# Supplementary material for: Does industry-sponsored education foster overdiagnosis and overtreatment of depression, osteoporosis and over­active bladder syndrome? An Australian cohort study
Source: PubMed Central journal article supplement — BMJ Open. 2018 Feb 13;8(2):e019027. doi: 10.1136/bmjopen-2017-019027 (PMC5829862; doi:10.1136/bmjopen-2017-019027), 2018-02-13
Supplement: bmjopen-2017-019027.draft_revisions.pdf [file bmjopen-2017-019027.draft_revisions.pdf]

# BMJ Open

BMJ Open is committed to open peer review. As part of this commitment we make the peer review history of every article we publish publicly available.

When an article is published we post the peer reviewers' comments and the authors' responses online. We also post the versions of the paper that were used during peer review. These are the versions that the peer review comments apply to.

The versions of the paper that follow are the versions that were submitted during the peer review process. They are not the versions of record or the final published versions. They should not be cited or distributed as the published version of this manuscript.

BMJ Open is an open access journal and the full, final, typeset and author-corrected version of record of the manuscript is available on our site with no access controls, subscription charges or pay-per-view fees (<http://bmjopen.bmj.com>).

If you have any questions on BMJ Open's open peer review process please email [editorial.bmjopen@bmj.com](mailto:editorial.bmjopen@bmj.com)

# BMJ Open

## How does industry-sponsored education market overdiagnosed conditions? A cohort study of depression, osteoporosis and overactive bladder events in Australia

|                                 |                                                                                                                                                                                                                                                                                                                                                                                                                                                                                                                                                        |
|---------------------------------|--------------------------------------------------------------------------------------------------------------------------------------------------------------------------------------------------------------------------------------------------------------------------------------------------------------------------------------------------------------------------------------------------------------------------------------------------------------------------------------------------------------------------------------------------------|
| Journal:                        | <i>BMJ Open</i>                                                                                                                                                                                                                                                                                                                                                                                                                                                                                                                                        |
| Manuscript ID                   | bmjopen-2017-019027                                                                                                                                                                                                                                                                                                                                                                                                                                                                                                                                    |
| Article Type:                   | Research                                                                                                                                                                                                                                                                                                                                                                                                                                                                                                                                               |
| Date Submitted by the Author:   | 06-Aug-2017                                                                                                                                                                                                                                                                                                                                                                                                                                                                                                                                            |
| Complete List of Authors:       | Mintzes, Barbara; University of Sydney Faculty of Health Sciences, Faculty of Pharmacy and Charles Perkins Centre<br>Swandari, Swestika; Ministry of Health, Makassar, Indonesia, Makassar Health Training Centre<br>Fabbri, Alice; University of Insubria, Centre for Research in Medical Pharmacology<br>Grundy, Quinn; The University of Sydney, Charles Perkins Centre and Faculty of Pharmacy<br>Moynihan, Ray; Bond University, Faculty of Health Sciences and Medicine<br>Bero, Lisa; University of Sydney Faculty of Health Sciences, Pharmacy |
| <b>Primary Subject Heading</b>: | Health policy                                                                                                                                                                                                                                                                                                                                                                                                                                                                                                                                          |
| Secondary Subject Heading:      | Medical education and training, Evidence based practice, Pharmacology and therapeutics                                                                                                                                                                                                                                                                                                                                                                                                                                                                 |
| Keywords:                       | Health policy < HEALTH SERVICES ADMINISTRATION & MANAGEMENT, Quality in health care < HEALTH SERVICES ADMINISTRATION & MANAGEMENT, MEDICAL EDUCATION & TRAINING, Depression & mood disorders < PSYCHIATRY, Urinary incontinences < UROLOGY, Musculoskeletal disorders < ORTHOPAEDIC & TRAUMA SURGERY                                                                                                                                                                                                                                                   |
|                                 |                                                                                                                                                                                                                                                                                                                                                                                                                                                                                                                                                        |

SCHOLARONE™  
Manuscripts

1  
2  
3 **How does industry-sponsored education market overdiagnosed conditions? A cohort study**  
4 **of depression, osteoporosis and overactive bladder events in Australia**  
5  
6  
7  
8  
9

10  
11 Barbara Mintzes, Swestika Swandari, Alice Fabbri, Quinn Grundy, Ray Moynihan, Lisa Bero  
12

13  
14 **Author affiliations**  
15

16 Barbara Mintzes, Senior Lecturer, Charles Perkins Centre and Faculty of Pharmacy,  
17 The University of Sydney, Camperdown NSW 2006, Australia  
18

19  
20 Swestika Swandari, Trainer, Makassar Health Training Centre, Ministry of Health, Makassar,  
21 Indonesia  
22

23  
24 Alice Fabbri, PhD student, Centre for Research in Medical Pharmacology, University of Insubria,  
25 Varese, 21100, Italy  
26  
27

28  
29 Quinn Grundy, Postdoctoral Research Fellow, Charles Perkins Centre and Faculty of Pharmacy,  
30 The University of Sydney, Camperdown NSW 2006, Australia  
31  
32

33  
34 Ray Moynihan, Senior Research Fellow, Faculty of Health Sciences and Medicine, Bond University,  
35 QLD 4229, Australia  
36  
37

38  
39 Lisa A Bero, Professor, Charles Perkins Centre and Faculty of Pharmacy, The University of Sydney,  
40 Camperdown NSW 2006, Australia  
41  
42

43  
44  
45  
46  
47 **Corresponding author:**

48 Dr. Barbara Mintzes,

49 Email: [Barbara.mintzes@sydney.edu.au](mailto:Barbara.mintzes@sydney.edu.au)

50  
51 Tel: +61 (0) 2 8627 0827  
52  
53

54  
55 **Copyright:** The Corresponding Author has the right to grant on behalf of all authors and does  
56 grant on behalf of all authors, an exclusive licence (or non exclusive for government employees)  
57  
58  
59  
60

1  
2  
3 on a worldwide basis to the BMJ Publishing Group Ltd to permit this article (if accepted) to be  
4 published in BMJ editions and any other BMJ PGL products and sublicences such use and exploit  
5 all subsidiary rights, as set out in our licence.  
6  
7  
8  
9

10 **Contributors:** BM initiated the study, designed the data coding approach and plans for analysis,  
11 assisted with the development of the coding scheme, carried out analyses, and drafted and  
12 revised the paper. She is the guarantor. SW and AF contributed to the study design and coding  
13 scheme, carried out data coding and analysis, and revised the draft paper; QG, RM and LB  
14 contributed to the study design and coding scheme and revised the draft paper.  
15  
16  
17  
18  
19

20 **Competing interests:** All authors have completed the ICMJE uniform disclosure form at  
21 [www.icmje.org/coi\\_disclosure.pdf](http://www.icmje.org/coi_disclosure.pdf) (available on request from the corresponding author). Dr.  
22 Mintzes reports that she was an expert witness on behalf of plaintiffs in a Canadian class action  
23 suit concerning cardiovascular risks of a testosterone gel. None of the other authors report any  
24 financial relationships with organisations that might have an interest in the submitted report in  
25 the previous three years. None of the authors have received any financing from pharmaceutical  
26 manufacturers. The authors declare no other relationships or activities that could appear to have  
27 influenced the submitted work.  
28  
29  
30  
31  
32  
33  
34  
35

36 **Transparency:** As guarantor, Dr Mintzes affirms that the manuscript is an honest, accurate, and  
37 transparent account of the study being reported; that no important aspects of the study have been  
38 omitted; and that any discrepancies from the study as planned have been explained.  
39  
40  
41  
42

43 **Funding:** The University of Sydney Faculty of Pharmacy provided summer scholarship funding  
44 for Swestika Swandari for work that contributed to this study. The authors received no additional  
45 support from any organisation for the submitted work.  
46  
47  
48  
49

50 **Ethical approval:** Not required.  
51  
52

53 **Article word count:** 2754; 3 tables, 2 figures, 1 on-line appendix.  
54  
55  
56  
57  
58  
59  
60

1  
2  
3 **Abstract: [300 words]**  
4

5  
6 **Objectives:** to investigate patterns of industry sponsored educational events that focus on  
7 specific health conditions for which there are concerns about overdiagnosis.  
8  
9

10 **Design and Setting:** This retrospective cohort study examines publicly reported industry-  
11 sponsored events in Australia from October 2011 to September 2015 for three conditions  
12 potentially subject to overdiagnosis: depression, osteoporosis, and overactive bladder. We used a  
13 database of transparency reports to identify events with a focus on depression, osteoporosis and  
14 overactive bladder and compared these with other sponsored events. We hypothesised that  
15 companies marketing treatments for each condition would sponsor related events and that target  
16 audiences would mainly work in primary care, reflecting a broad patient population.  
17  
18  
19  
20  
21  
22  
23

24 **Main outcome measures:** Event and attendee characteristics, sponsoring companies, related  
25 marketed treatments, cost-effectiveness ratings and dispensing rates.  
26  
27

28  
29 **Results:** Over the study period, we identified 3,132 events: 1,567 events focusing on depression,  
30 1,375 on osteoporosis and 190 on overactive bladder, with a total of 96,660 attendees. These  
31 condition-focused events included more dinners than other sponsored events, and were more  
32 often attended by primary care doctors: relative risk (RR) = 3.06 (95% CI 2.81 – 3.32) for  
33 depression, RR= 1.48 (95% CI 1.41-1.55) for osteoporosis, and RR= 2.59 (95% CI 2.09-3.21)  
34 for overactive bladder. Servier, which markets agomelatine and AstraZeneca (quetiapine)  
35 sponsored 51.2% and 23.0% of depression events respectively. Amgen and GSK, which co-  
36 market denosumab, sponsored 49.5% of osteoporosis events, and Astellas and CSL (mirabegron  
37 and solifenacin) sponsored 80.5% of overactive bladder events.  
38  
39  
40  
41  
42  
43  
44  
45

46 **Conclusions:** Industry sponsorship of education on depression, osteoporosis and overactive  
47 bladder focused on primary care and was concentrated among few companies that market  
48 medicines for each condition. These products are subject to efficacy, safety and cost-  
49 effectiveness concerns, raising questions about the focus of sponsored education.  
50  
51  
52  
53  
54  
55  
56  
57  
58  
59  
60

### Strengths and limitations of this study

- Australia's transparency reports of industry funding of health professionals were unique internationally until 2015, in that the focus was on sponsored events.
- This is the first data-driven national analysis of condition-specific industry educational event sponsorship for overdiagnosed conditions.
- Classification of events was blinded to sponsor, attendee characteristics, and event descriptions.
- For each condition, we examined trends over time in sales and dispensing of lead sponsors' relevant marketed drugs, but we could not assess causal links between increased prescribing and event attendance, as no information was publicly available on the identity of individual event participants.
- Limited detail was available on the content of sponsored events; therefore, despite a sensitive search, we may have missed some relevant events per condition

## Introduction

The role of pharmaceutical industry sponsorship of health professional education has been subject to considerable controversy. There is disagreement about whether sponsored education is primarily promotional or educational. It has been described on the one hand as, “marketing masquerading as education”, (1) and on the other, if accompanied by proper controls, as able to meet the goal of, “needs based, relevant, accessible education that is balanced and unbiased and improves health care outcomes.” (2)

This controversy extends not only to how treatment outcomes are discussed, but also to how conditions are defined. Messages in commercially-sponsored education may exaggerate prevalence and/or attempt to medicalise aspects of ordinary life. Identified “marketing messages” in continuing medical education (CME) for low female sexual desire included statements that it is “very common and underdiagnosed”, and that, “women may not be aware that they are sick or distressed.” (3) Similarly, United States (U.S.) CME sponsored by a testosterone manufacturer supported a broader definition of hypogonadism than in listed indications for testosterone. (4)

A sponsored CME campaign can reach many health professionals, with potential widespread effects on practice. Purdue Pharma’s launch of the opioid analgesic oxycodone in the U.S. included over 20,000 sponsored educational events, many of which targeted GPs, potentially contributing to more opioid use in primary care. (5)

These are product-specific examples of sponsored CME that received media attention and may not reflect broader trends. There has been little exploration of the link between sponsored CME and specific conditions prone to overdiagnosis. Overdiagnosis, the detection of conditions unlikely to lead to ill-health, disability or death in the absence of treatment, has been characterised as a “modern epidemic”. (6, 7) It can lead to harm from adverse effects of treatments from which a person is unlikely to benefit, to psychological harm if a healthy person suffers from anxiety or stigma due to disease labelling, and to harm to society through higher healthcare costs. There is evidence of commercial influence on overdiagnosis in a range of conditions, through direct and indirect marketing aiming to establish the need for a product. (7)

1  
2  
3 National patterns of industry sponsorship can shed light on controversies concerning the role of  
4 sponsored CME. From 2007 to late 2015, members of Medicines Australia, the national  
5 pharmaceutical industry trade association, were required by law to report on sponsored events for  
6 health professionals. (8) These data provide a unique opportunity to examine the link between  
7 condition-specific sponsored events and companies marketing medicines for a condition.  
8  
9

10  
11  
12  
13 We report here on event sponsorship with a focus on three conditions highlighted in the medical  
14 literature as potentially subject to overdiagnosis: depression, (9) osteoporosis (10), and  
15 overactive bladder. (11)  
16  
17

18  
19  
20 We hypothesise that companies marketing drugs for depression, osteoporosis, or overactive  
21 bladder are more likely to sponsor events with a focus on that condition than other companies.  
22 We also hypothesise that these events tend to target a primary care audience, reflecting milder  
23 disease states. To investigate clinical implications, we examine whether sponsors' products were  
24 judged to be cost-effective and are covered under Australia's Pharmaceutical Benefits Scheme's  
25 (PBS). We assess sponsorship patterns per condition in terms of audience, clinical versus non-  
26 clinical setting, provision of meals, and timing in relation to when a company had a product for  
27 sale.  
28  
29  
30  
31  
32  
33

## 34 35 **Methods**

### 36 37 *Data sources*

38  
39  
40 We downloaded 301 publicly available company reports covering the period October 2011 to  
41 September 2015 from the Medicines Australia website ([www.medicinesaustralia.com.au](http://www.medicinesaustralia.com.au)),  
42 converted them from PDF into Excel files, cleaned the data and resolved discrepancies. These  
43 reports include the sponsoring company, timing, event description, venue type, number and  
44 profession of attendees, hospitality costs and total event costs. Coding methods are described in  
45 detail elsewhere. We developed a retrospective cohort of sponsored events based on timing of  
46 sponsorship per company over time. (12) The data set used for this analysis is available at:  
47  
48  
49  
50  
51  
52  
53 <http://dx.doi.org/10.4227/11/592631edbd9d5>  
54  
55  
56  
57  
58  
59  
60



1  
2  
3 We obtained a list of brands sold in Australia for each condition from the Australian Medicines  
4 Handbook (13) and manufacturers' websites, and annual dispensing data for publicly reimbursed  
5 drugs through Australia's Pharmaceutical Benefit Scheme (PBS)  
6 <http://www.pbs.gov.au/info/browse/statistics#AS>. For non PBS-subsidised drugs, sales volume  
7 data were obtained through QuintilesIMS.  
8  
9  
10  
11

12  
13 We examined volume of use using annual numbers of dispensed prescriptions for PBS-  
14 subsidised drugs and numbers of units sold to retail and hospital pharmacies for non PBS-  
15 subsidised drugs.  
16  
17  
18  
19

### 20 ***Selection of targeted conditions***

21  
22 We chose depression, osteoporosis, and overactive bladder as illustrative case studies of  
23 conditions for which diagnostic thresholds and treatment have extended beyond levels at which  
24 patients are likely to benefit. We selected these conditions *a priori* before carrying out any  
25 analyses.  
26  
27  
28  
29

30  
31 Depression screening leads to many false positives, (14) (15) and many patients prescribed  
32 antidepressants in primary care fail to meet diagnostic criteria for major depression, (16) a  
33 phenomenon that has been described as "medicalising sadness". (9) In 2013, Australia had the  
34 second highest rate of antidepressant use among OECD countries. (17)  
35  
36  
37  
38

39 Questions have also been raised about diagnostic criteria for osteoporosis. Bone density  
40 screening is poorly predictive of clinical fractures, and a focus on bone density rather than  
41 fragility fractures has led to many more diagnoses. (10) Further treatment expansion has  
42 occurred through lowered thresholds for "pre-osteoporosis" and "osteopenia".  
43  
44  
45  
46

47 An "imprecise" symptom-based definition of overactive bladder, largely linked to commercial  
48 interests, has replaced urodynamically confirmed bladder instability. (11) Tolterodine, marketed  
49 by Pharmacia, was the first drug approved for overactive bladder symptoms. In 2002,  
50 Pharmacia's Vice-President described a threefold expansion of the treatable population through a  
51 definition of overactive bladder no longer requiring urinary incontinence. (18)  
52  
53  
54  
55  
56  
57  
58  
59  
60

### *Coding of Medicines Australia data on sponsored events*

An initial coding scheme for industry-sponsored events included sponsoring company, location, attendee profession, clinical focus, type of hospitality, and a set of relevant keywords to search unstructured text. (12) We designed an additional coding scheme to identify events focusing on the three included conditions. The research team iteratively developed keywords based on disease names/symptoms and drug classes and products sold in Australia (generic and brand names) for each condition. Keywords were used to search unstructured text in the “Description of function” column of reports. All relevant keywords associated with  $\geq 1$  event listed in the database were retained in the final coding scheme. (On-line Appendix, Table 1) During coding, we concealed other variables (using Excel’s ‘Column Hide’ function) to blind the coder [SS] to sponsor, attendee characteristics, and event descriptors.

### *Analysis*

For each included condition, we provide a detailed analysis for all companies sponsoring at least 5% of events. We examined whether these companies market drugs to treat the condition, and PBS reimbursement status for these drugs. We present frequency tables for event and attendee characteristics. Costs are reported in AUD\$. We performed chi square analyses to compare events per condition with other sponsored events using SPSS-Version 22.

### *Results*

Over the 4-year study period, we identified 3,132 events focusing on the three conditions, with 96,620 attendees. This was 1,567 events with a focus on depression, with 41,474 attendees; 1,375 on osteoporosis with 33,916 attendees; and 190 on overactive bladder with 21,270 attendees. As no individuals are named, we could not ascertain numbers of repeat attendees. Table 1 summarises event characteristics. Events focusing on these conditions represent 2.7% of sponsored events (n=116,845) over the 4-year period, and 2.8% of attendees (n=3,481,750).

For all three conditions, the median number of event attendees (19-20) was similar to sponsored events in general (12). However, attendees were more likely to be primary care physicians (GPs or family medicine) than at other events: relative risk (RR) = 3.06 (95% CI 2.81 – 3.32) for

1  
2  
3 depression, RR= 1.48 (95% CI 1.41-1.55) for osteoporosis, and RR= 2.59 (95% CI 2.09-3.21)  
4 for overactive bladder. Depression and osteoporosis events were also more likely to feature a  
5 dinner than other events: RR= 1.73 (95% CI 1.64-1.82) for depression and RR = 1.33 (95% CI  
6 1.27-1.38) for osteoporosis. This trend was not seen for overactive bladder. For all three  
7 conditions, events were less often held in a clinical setting (hospital or clinic) than other  
8 sponsored events: RR = 0.51 (95% CI 0.50-0.53) for depression; RR = 0.72 (95% CI 0.68-0.76)  
9 for osteoporosis; RR= 0.47 (95% CI 0.43-0.50) for overactive bladder.  
10  
11

12  
13  
14 The median cost per attendee was higher than for events in general (AUD\$14): AUD\$104 for  
15 depression, AUD\$52 for osteoporosis, and AUD\$85 for overactive bladder. (Table 1)  
16  
17

18  
19  
20 Sponsorship was highly concentrated by company. Figure 1 provides an overview of companies  
21 sponsoring  $\geq 5\%$  of events. All sell at least one drug for the relevant indication. Table 2 provides  
22 an overview of these drugs' PBS funding status. We present illustrative event descriptions  
23 featuring brand names in Table 3, with added details on sponsored events per company in on-line  
24 appendix Table 3.  
25  
26  
27  
28  
29  
30

### 31 *Depression-related events*

32  
33  
34

35 Two companies sponsored  $> 80\%$  of depression-related events: Servier (51.2% of events), which  
36 markets the antidepressant agomelatine (Valdoxan) and AstraZeneca (23.0% of events), which  
37 markets quetiapine (Seroquel XR), an antipsychotic approved for depression treatment in  
38 patients intolerant to other therapies or with inadequate response. Neither agomelatine nor the  
39 depression indication for quetiapine are PBS-subsidised. Pfizer, which markets five PBS-  
40 subsidised antidepressants (desvenlafaxine, venlafaxine, sertraline, reboxetine, doxepin), was the  
41 next most frequent sponsor (16.0% of events).  
42  
43  
44  
45  
46  
47

48 We examined agomelatine and quetiapine sales volumes over the study period. Agomelatine  
49 sales tripled, from 99,625 units in 2012 to 300,103 units in 2015 (28 days treatment/unit). Sales  
50 of Seroquel XR (AstraZeneca), the quetiapine formulation approved for depression, increased  
51 from 247,374 units in 2012 to 374,917 in 2015 (60 days treatment/unit). Sales of other  
52 AstraZeneca quetiapine formulations decreased over the same period, from 499,445 units sold in  
53 2012 to 202,783 in 2015. (19) (on-line Appendix, Figure 3.1)  
54  
55  
56  
57  
58  
59  
60

1  
2  
3 Seventy-nine AstraZeneca events focused on ‘the anxious depressed patient’. Figure 2 is an  
4 invitation for one of these events, featuring the same image that was used in a Seroquel XR  
5 (quetiapine) advertisement that appeared in the *Medical Journal of Australia*. This formulation  
6 of quetiapine is also indicated for generalised anxiety disorder.  
7  
8  
9

### 10 11 *Osteoporosis-related events*

12  
13  
14 Osteoporosis event sponsorship, similarly, was highly concentrated: Amgen and GSK, which co-  
15 market denosumab (Prolia), sponsored 31.3% and 18.1% of events respectively (in total, 49.4%).  
16 Novartis, which markets zoledronic acid (Aclasta) and oestradiol/norethisterone (Estalis  
17 continuous), a hormone therapy approved for osteoporosis prevention in high-risk women  
18 intolerant of other products, sponsored 19.9% of events; Servier, which markets strontium  
19 (Protos), sponsored 15.0%; and Sanofi, which marketed risedronic acid (Actonel) until  
20 December 2014, sponsored 8.7%. Denosumab, zoledronic acid, oestradiol/norethisterone, and  
21 risedronic acid are PBS-subsidised; strontium was delisted in August 2016 due to cardiac risks.  
22  
23  
24  
25  
26  
27  
28  
29

30 Sanofi transferred its marketing rights for risedronate to Actavis in December 2014. (20) Sanofi  
31 sponsored no osteoporosis events from October 2014 onwards. (Appendix Figure 1)  
32  
33

34  
35 Denosumab dispensations increased nearly 7-fold over the study period, from 45,220 in 2012 to  
36 309,350 in 2015. (21) Risedronate, zoledronic acid and strontium dispensations all decreased  
37 (on-line appendix, Figure 3.2) Of 193 events mentioning denosumab’s brand name, Prolia, 104  
38 were sponsored by Amgen and 88 by GSK.  
39  
40  
41  
42

### 43 *Overactive bladder-related events*

44  
45  
46 Two companies dominated sponsorship of overactive bladder events: Astellas (40.5% of events),  
47 which markets mirabegron (Betmiga) and solifenacin (Vesicare), the latter after October 2014,  
48 and CSL (40.0% of events), which marketed solifenacin from February 2011 to October 2014.  
49 Neither drug is PBS-subsidised. Astellas did not request PBS reimbursement for mirabegron.  
50 PBAC rejected solifenacin in 2007, judging benefits and cost-effectiveness to be uncertain.  
51  
52  
53  
54  
55  
56  
57  
58  
59  
60

1  
2  
3 All CSL-sponsored overactive bladder events occurred while the company held distribution  
4 rights for solifenacin, e.g. to October 2014; most Astellas-sponsored events were held from 2014  
5 onwards, when it obtained marketing rights. (on-line appendix Figure 2) Both solifenacin and  
6 mirabegron sales increased over the study period. (on-line appendix, Figure 3.3)  
7  
8  
9

## 10 11 **Discussion**

12  
13  
14 In this analysis of 3,132 Australian pharmaceutical industry-sponsored events with 96,660  
15 attendances, focusing on three clinical conditions prone to overdiagnosis, we found a strong  
16 concentration of sponsorship among few companies. Two companies sponsored over 70% of  
17 depression events; another two companies over 80% of overactive bladder events. In  
18 osteoporosis, the two companies that co-market denosumab sponsored nearly 50% of events.  
19  
20  
21  
22  
23

24  
25 Several products marketed by key event sponsors were considered unacceptable for PBS  
26 reimbursement, and are associated with cost, efficacy and safety concerns that have been flagged  
27 internationally. Servier, which sponsored over half of depression-related events, sells  
28 agomelatine, which is not PBS-subsidised. Agomelatine is not approved in the U.S. or Canada. A  
29 French independent drug bulletin, *Prescrire*, characterized the drug as “more dangerous than  
30 useful” and called for its withdrawal in 2015. (22) A Spanish bulletin, similarly, considered it,  
31 “worse than first-line antidepressants, up to 15-fold more expensive, and a worrying hepatic  
32 safety profile.”(23)  
33  
34  
35  
36  
37  
38  
39

40 A 2012 Cochrane systematic review found that AstraZeneca’s atypical antipsychotic, quetiapine  
41 (Seroquel XR), had limited efficacy evidence for depression. (24) An updated systematic review,  
42 published in 2015, concluded that quetiapine had not been shown to improve function and that  
43 methodological biases had exaggerated benefits and minimised harm. (25)  
44  
45  
46  
47

48 Like agomelatine, denosumab (Prolia) is on the French bulletin *Prescrire*’s list of 71 drugs to  
49 avoid in 2016 because of “a disproportionate risk of adverse events” including serious infections  
50 due to immunosuppression, with only modest efficacy. (26) In 2015, half of all new Australian  
51 osteoporosis prescriptions were for denosumab. (27)  
52  
53  
54  
55  
56  
57  
58  
59  
60

1  
2  
3 All anticholinergic overactive bladder drugs, including solifenacin, have modest benefits,  
4 preventing one incontinence episode on average every two days, with frequent dry mouth and  
5 constipation, and there is observational evidence of dementia risk with longer-term use. (28)  
6  
7 Mirabegron has similar efficacy to anticholinergics (28) and can lead to severe hypertension.  
8  
9 (29)  
10  
11

12  
13 This analysis is limited by the data available. Our analysis only includes 2.7% of events, a likely  
14 underestimate as not all event descriptions mention a condition. These three conditions are  
15 illustrative case studies and cannot be assumed to represent all condition-related sponsored  
16 events. However, a strength of this analysis is that it covers all sponsored events in Australia  
17 over four years, and coding was blinded to sponsor identity, types of attendees, gifts and costs.  
18  
19 Due to the unique Australian dataset, this is the first such data-driven national analysis to  
20 examine condition-specific event sponsorship.  
21  
22  
23  
24  
25  
26

27 Company reports on financing of sponsored events provided limited information on content,  
28 leaving many questions unanswered. More research is needed on the messages in sponsored  
29 education, including on thresholds for disease diagnosis and treatment. Additionally, as  
30 individuals were not named, we could not directly evaluate the link between event attendance  
31 and individual prescribing patterns.  
32  
33  
34  
35  
36

37 We could only examine potential contributions to overdiagnosis indirectly. We had hypothesized  
38 that events would focus on primary care, reflecting milder disease states. Nearly two-thirds of  
39 events, 62%, for the three conditions were attended by primary care doctors, versus 21% of other  
40 events. The focus on primary care was most pronounced for depression events: 74%.  
41  
42  
43  
44

45 The concentration of sponsorship by companies marketing products subject to safety, cost and  
46 efficacy concerns raises questions about influences on prescribing choice. This pattern is  
47 consistent with Brody and Light's hypothesis of an "inverse benefit law", in which intense  
48 marketing of drugs that may benefit a small proportion of patients is harmful to public health  
49 because a broader patient population is targeted than is likely to benefit. (30)  
50  
51  
52  
53  
54

55 Many of these condition-focused events included dinner and were held in non-clinical settings  
56 such as restaurants. Costs per person were higher than for events in general. Even small gifts,  
57  
58  
59  
60

1  
2  
3 such as food and drink, can affect behaviour. (31) An analysis of U.S. transparency reports found  
4 that physicians who receive  $\geq 1$  sponsored meal with a mean value of  $< \text{US } \$20$  were more likely  
5 to prescribe the promoted product, with larger effects observed the more meals received. (32)  
6  
7  
8

9  
10 Timing of sponsorship was linked to when a company sold a drug to treat the included condition,  
11 consistent with a sales orientation. Companies discontinued event sponsorship of overactive  
12 bladder and osteoporosis events when they no longer had marketing rights for a product for these  
13 conditions. This promotional orientation is consistent with internal documents released during  
14 the U.S. legal case on gabapentin, which described the use of CME to market off-label use. (33)  
15  
16  
17  
18

19  
20 In this 4-year overview of industry-sponsored events focusing on depression, osteoporosis and  
21 overactive bladder, we found concentrated sponsorship among few companies per condition.  
22 These companies mainly market products that are not considered cost-effective choices for the  
23 specified conditions. This raises concerns about impacts on prescribing quality and on national  
24 prescribing trends. There was a strong focus on primary care physicians, frequent provision of  
25 dinner, and non-clinical setting. Promotion in primary care is consistent with a focus on a  
26 broader rather than narrower patient population. This observed pattern of event sponsorship  
27 raises concerns about the role of industry-sponsored education in conditions identified as prone  
28 to overdiagnosis, and highlights the need for continuing professional education to be free of  
29 commercial sponsorship.  
30  
31  
32  
33  
34  
35  
36  
37  
38

### 39 **Figure legends:**

40  
41  
42 **Figure 1: Percent of events sponsored by each company, in total and per condition\***  
43  
44

45 **Figure 2: Invitation for an AstraZeneca sponsored event**  
46  
47  
48

49 **Acknowledgements:** The authors would like to thank QuintilesIMS for their assistance in  
50 providing data on pharmaceutical sales volumes in Australia.  
51  
52  
53

54 **Data sharing:** The data set used for this study is publicly available at:

55 <http://dx.doi.org/10.4227/11/592631edbd9d5>  
56  
57  
58  
59  
60

1  
2  
3  
4  
5 **Access to the data:** All authors had full access to all of the data (including statistical reports and  
6 tables) in the study and can take responsibility for the integrity of the data and the accuracy of  
7 the data analysis.  
8  
9

10  
11  
12 **Previous presentations:** Preliminary study results were presented at the *Preventing*  
13 *Overdiagnosis* conference in Barcelona, Spain, September 2016.  
14  
15  
16  
17  
18  
19  
20  
21  
22  
23  
24  
25  
26  
27  
28  
29  
30  
31  
32  
33  
34  
35  
36  
37  
38  
39  
40  
41  
42  
43  
44  
45  
46  
47  
48  
49  
50  
51  
52  
53  
54  
55  
56  
57  
58  
59  
60



## References

1. Moynihan R. Doctors' education: the invisible influence of drug company sponsorship. *BMJ*. 2008;336(7641):416-7.
2. Marlow B. Is continuing medical education a drug-promotion tool?: NO. *Canadian Family Physician*. 2007;53(10):1650-2, 4-6.
3. Meixel A, Yanchar E, Fugh-Berman A. Hypoactive sexual desire disorder: inventing a disease to sell low libido. *J Med Ethics*. 2015;41(10):859-62.
4. Fauber J, Jones C, Fiore K. Slippery Slope: Testosterone Muscles Its Way to Profits. *Medpage Today*. October 18, 2015. Available at: <http://www.medpagetoday.com/special-reports/slipperyslope/54156> Accessed January 17, 2017.
5. Spithoff S. Industry involvement in continuing medical education: time to say no. *Canadian Family Physician*. 2014;60(8):694-6, 700-3.
6. Hoffman JR, Cooper, R.J. Overdiagnosis of disease: a modern epidemic. *Arch Intern Med*. 2012;172(15):1123-4.
7. Moynihan R, Heath I, Henry D. Selling sickness: the pharmaceutical industry and disease mongering. *BMJ*. 2002;324(7342):886-91.
8. Monk D. Improving transparency in the pharmaceutical industry. *Australian Prescriber*. 2016;39(4):110-111.
9. Dowrick C, Frances A. Medicalising unhappiness: new classification of depression risks more patients being put on drug treatment from which they will not benefit. *BMJ*. 2013;347.
10. Jarvinen TL, Michaelsson K, Jokihaara J, et al. Overdiagnosis of bone fragility in the quest to prevent hip fracture. *BMJ*. 2015;350:h2088.
11. Tikkinen KA, Auvinen A. Does the imprecise definition of overactive bladder serve commercial rather than patient interests? *Eur Urol*. 2012;61(4):746-8.

12. Fabbri A, Grundy, Q, Mintzes B, et al. Pharmaceutical industry-funded events for health professionals: An analysis of data released under Australian transparency rules. *BMJ Open* 2017;7:e016701. doi:10.1136/bmjopen-2017-016701
13. Australian Medicines Handbook. Adelaide, Australia: AMH; 2016.
14. Jerant A, Kravitz RL, Fernandez YGE, et al. Potential antidepressant overtreatment associated with office use of brief depression symptom measures. *J Am Board Fam Med*. 2014;27(5):611-20.
15. Mitchell AJ VA, Rao S. Clinical diagnosis of depression in primary care: a meta-analysis. *Lancet*. 2009;374:609–19.
16. Wong J MA, Egualé T, Buckeridge DL, Abrahamowicz M, Tamblyn R. Treatment Indications for Antidepressants Prescribed in Primary Care in Quebec, Canada, 2006-2015. *JAMA* 2016; 315(20):2230-1.
17. Organisation for Economic Cooperation and Development (OECD). Health at a Glance 2015: How does Australia compare? Available at: <https://www.oecd.org/australia/Health-at-a-Glance-2015-Key-Findings-AUSTRALIA.pdf> Accessed January 16, 2017.
18. Elliott C. White Coat, Black Hat. Adventures on the Dark Side of Medicine. Boston, MA, USA: Beacon Press; 2010.
19. QuintilesIMS. Quetiapine Fumarate unit sales in Australia, 2012 to 2015. *Data provided to authors on request by QuintilesIMS, November 2016.*
20. Actavis takes back Actonel December 12, 2014. Available at: <https://pharmadispatch.com/news/actavis-takes-back-actonel> Accessed January 9, 2017.
21. Pharmaceutical Benefits Scheme. Australian Department of Health. ASM\_Table\_1. Australian Statistics on Medicine. 2012 to 2015. Available at: <https://www.pbs.gov.au/info/browse/statistics - Expenditure2016> Accessed January 25, 2017.

- 1  
2  
3  
4  
5  
6  
7  
8  
9  
10  
11  
12  
13  
14  
15  
16  
17  
18  
19  
20  
21  
22  
23  
24  
25  
26  
27  
28  
29  
30  
31  
32  
33  
34  
35  
36  
37  
38  
39  
40  
41  
42  
43  
44  
45  
46  
47  
48  
49  
50  
51  
52  
53  
54  
55  
56  
57  
58  
59  
60
22. Prescrire Editorial Staff. Pour mieux soigner, des médicaments à écarter : bilan 2015. La Revue Prescrire. 2015;35(376):144-51.
  23. Anonymous. Agomelatine (Valdoxan). Worse than first-line antidepressants, up to 15-fold more expensive, and a worrying hepatic safety profile. Drug Assessment Report Drug and Therapeutics Bulletin of Navarre. DAR no. 3. 2010. Available at: [http://www.navarra.es/home\\_en/Temas/Portal+de+la+Salud/Profesionales/Documentacion+y+publicaciones/Publicaciones+tematicas/Medicamento/FET/2010/DAR+No+3+Agomelatine.htm](http://www.navarra.es/home_en/Temas/Portal+de+la+Salud/Profesionales/Documentacion+y+publicaciones/Publicaciones+tematicas/Medicamento/FET/2010/DAR+No+3+Agomelatine.htm) Accessed January 25, 2017.
  24. Komossa K, Depping, AM, Gaudchau A et al. Second-generation antipsychotics for major depressive disorder and dysthymia. . Cochrane Database of Systematic Reviews. 2010;12.
  25. Therapeutics Initiative. Antipsychotics should not be used for non-psychotic depression. Therapeutics Letter 95. September 30, 2015. Available at: <http://www.ti.ubc.ca/2015/09/30/antipsychotics-should-not-be-used-for-non-psychotic-depression/> Accessed January 16, 2017.
  26. Prescrire Editorial Staff. Towards better patient care: drugs to avoid in 2016. Prescrire International. 2016;25(170):105-11.
  27. McColl G. Chair, Drug Utilisation Sub Committee. Drug Utilisation Committee Outcome Statement 29-30 September 2016. Canberra, Australia. Pharmaceutical Benefits Advisory Committee, Pharmaceutical Benefits Service. 2016. Available at: <http://www.pbs.gov.au/industry/listing/elements/dusc-meetings/dos/dusc-dos-sep-2016.pdf> Accessed January 16, 2017.
  28. Therapeutics Initiative. Are claims for newer overactive bladder drugs warranted? Therapeutics Letter 93, April 22, 2015. Available at: <http://www.ti.ubc.ca/2015/04/22/are-claims-for-newer-drugs-for-overactive-bladder-warranted/> Accessed January 26, 2017.
  29. Medicines and Health Products Regulatory Agency, UK. Mirabegron (Betmiga ▼): risk of severe hypertension and associated cerebrovascular and cardiac events. Drug Safety Update. 14 October, 2015. Available at: <https://www.gov.uk/drug-safety-update/mirabegron-betmiga->

1  
2  
3 [risk-of-severe-hypertension-and-associated-cerebrovascular-and-cardiac-events](#) Accessed  
4  
5 January 20, 2017.  
6  
7

- 8 30. Brody H, Light DW. The Inverse Benefit Law: How Drug Marketing Undermines Patient  
9 Safety and Public Health. *American Journal of Public Health*. 2011;101(3):399-404.  
10  
11 31. Dana J, Loewenstein G. A Social Science Perspective on Gifts to Physicians From Industry.  
12 *JAMA*. 2003;290(2):252-5.  
13  
14 32. DeJong C, Aguilar T, Tseng C, Lin GA, Boscardin W, Dudley R. Pharmaceutical industry–  
15 sponsored meals and physician prescribing patterns for medicare beneficiaries. *JAMA*  
16 *Internal Medicine*. 2016;176(8):1114-10.  
17  
18 33. Steinman MA, Bero LA, Chren M, Landefeld C. Narrative review: The promotion of  
19 gabapentin: an analysis of internal industry documents. *Ann Intern Med*. 2006;145(4):284-  
20 93.  
21  
22  
23  
24  
25  
26  
27  
28  
29  
30  
31  
32  
33  
34  
35  
36  
37  
38  
39  
40  
41  
42  
43  
44  
45  
46  
47  
48  
49  
50  
51  
52  
53  
54  
55  
56  
57  
58  
59  
60

34.

Table 1: Characteristics of sponsored events for the three conditions

|                                                           | Total events<br>n=116,845  | Depression<br>n=1,567     | Osteoporosis<br>n=1,375      | Overactive<br>bladder<br>n=190 |
|-----------------------------------------------------------|----------------------------|---------------------------|------------------------------|--------------------------------|
| <b>Attendees</b>                                          |                            |                           |                              |                                |
| Total number of attendees (% of total)                    | 3,481,750                  | 41,472 (1.2%)             | 33,916 (1.0%)                | 21,270 (0.6%)                  |
| Median/ event (IQR)                                       | 18 (12-25)                 | 19 (12-28)                | 19 (12-27)                   | 20 (13-34)                     |
| <b>Clinicians present (% of events)</b>                   |                            |                           |                              |                                |
| Medical specialists                                       | 80,060 (68.5%)             | 839 (53.5%)               | 921 (67.0%)                  | 50 (26.3%)                     |
| Primary care doctors                                      | 24,662 (21.1%)             | 1,159 (74.0%)             | 638 (46.4%)                  | 132 (69.5%)                    |
| Trainees                                                  | 44,774 (38.3%)             | 222 (14.2%)               | 531 (38.6%)                  | 18 (9.5%)                      |
| Nurses                                                    | 46,214 (39.6%)             | 357 (22.8%)               | 359 (26.1%)                  | 46 (24.2%)                     |
| <b>Types of medical specialists present (% of events)</b> |                            |                           |                              |                                |
| <i>Most frequent</i>                                      | Oncology<br>19,723 (16.9%) | Psychiatry<br>804 (51.3%) | Endocrinology 516<br>(37.5%) | Urology<br>30 (15.9%)          |
| <i>Second</i>                                             | Surgery<br>10,670 (9.1%)   | Geriatrics<br>55 (3.5%)   | Rheumatology 190<br>(13.8%)  | Ob/Gyn<br>13 (6.8%)            |
| <b>Expenses (AUD\$)</b>                                   |                            |                           |                              |                                |
| Total cost of events                                      | \$286,117,928              | \$6,259,581(2.2%)         | \$6,073,333(2.1%)            | \$568,332 (0.2%)               |
| Median cost per event (IQR)                               | \$263<br>(\$153-1,195)     | \$1,941<br>(\$659-3,264)  | \$686<br>(\$217-2,500)       | \$2,012<br>(\$765-3,370)       |
| Median cost per head (IQR)                                | \$14 (\$10-68)             | \$104 (\$48-141)          | \$52 (\$13-119)              | \$85 (\$31-90)                 |
| Food & drink cost (% of total cost)                       | \$84,862,791<br>(30%)      | \$2,441,950 (39%)         | \$2,314,319<br>(38%)         | \$233,548<br>(41%)             |
| Median per event food & drug cost (IQR)                   | \$197<br>(\$107-405)       | \$911<br>(\$135- 1,712)   | \$337 (\$150 -<br>1,478)     | \$1,115<br>(\$91-1868)         |
| Median per head food & drink cost (IQR)                   | \$12 (\$8-20)              | \$57 (\$11-77)            | \$17 (\$11-75)               | \$55 (\$11-80)                 |
| <b>Event characteristics</b>                              |                            |                           |                              |                                |
| Clinical setting                                          | 74,998 (64.2%)             | 487 (31.1%)               | 692 (50.3%)                  | 44 (23.2%)                     |
| Any food provided                                         | 105,667(90.4%)             | 1441 (92.0%)              | 1298 (94.4%)                 | 158 (83.2%)                    |
| Dinner                                                    | 19,873 (17.0%)             | 811 (51.7%)               | 512 (37.2%)                  | 41 (21.6%)                     |
| Lunch                                                     | 25,935 (22.2%)             | 241 (15.4%)               | 485 (35.3%)                  | 28 (14.7%)                     |
| Tea                                                       | 14,067 (12.0%)             | 15 (1.0%)                 | 69 (5.0%)                    | 2 (1.1%)                       |
| Breakfast                                                 | 12,806 (11.0%)             | 24 (1.5%)                 | 77 (5.6%)                    | 7 (3.7%)                       |
| All-day event meals                                       | 3,113 (2.7%)               | 62 (4.0%)                 | 58 (4.2%)                    | 1 (0.5%)                       |
| Unspecified                                               | 29,873 (25.6%)             | 288 (18.4%)               | 97 (7.1%)                    | 79 (41.6%)                     |

Abbreviations: IQR = interquartile range

**Table 2: Pharmaceutical Benefits Scheme (PBS) subsidy of drugs marketed for depression, osteoporosis, and overactive bladder marketed by sponsoring companies**

| Company             | Drug for condition (brand)                                                                     | PBS subsidy?(Y/N)                                                | PBAC decisions and rationale for restrictions                                                                                                                                                                                                                                                               | Notes                                                                                                   |
|---------------------|------------------------------------------------------------------------------------------------|------------------------------------------------------------------|-------------------------------------------------------------------------------------------------------------------------------------------------------------------------------------------------------------------------------------------------------------------------------------------------------------|---------------------------------------------------------------------------------------------------------|
| <b>Depression</b>   |                                                                                                |                                                                  |                                                                                                                                                                                                                                                                                                             |                                                                                                         |
| Servier             | Agomelatine (Valdoxan)                                                                         | No                                                               | Nov 2010: uncertainty; inappropriate comparator<br>July 2011, March 2012: superior clinical effectiveness and safety over SSRIs not demonstrated                                                                                                                                                            |                                                                                                         |
| AstraZeneca         | Quetiapine (Seroquel XR) <sup>a</sup>                                                          | No for MDD, treatment-resistant depression or anxiety disorders. | Nov 2011: inadequate clinical evidence to support superiority.<br>July 2013: non-inferior comparative safety and effectiveness not established                                                                                                                                                              | Quetiapine is PBS-funded for schizophrenia; acute mania & bipolar disorder                              |
| Pfizer              | Desvenlafaxine (Pristiq)                                                                       | Yes                                                              | Nov 2008: <i>cost minimisation</i> <sup>b</sup> vs. venlafaxine; no evidence of therapeutic advantage.                                                                                                                                                                                                      |                                                                                                         |
|                     | Venlafaxine (Efexor-XR, Altven), Sertraline (Zoloft), Reboxetine (Edronax), Doxepin (Sinequan) | Yes                                                              | <i>General schedule</i> <sup>c</sup> listings, major depressive disorder.                                                                                                                                                                                                                                   |                                                                                                         |
| <b>Osteoporosis</b> |                                                                                                |                                                                  |                                                                                                                                                                                                                                                                                                             |                                                                                                         |
| Amgen and GSK       | Denosumab (Prolia)                                                                             | Yes                                                              | July 2010: <i>cost-minimisation</i> <sup>b</sup> vs. zoledronic acid<br>Nov 2011: <i>Streamlined Authority</i> <sup>d</sup> , post-menopausal osteoporosis, age 70+, BMD T-score ≤ -2.5; cost-minimisation vs. alendronate<br>July 2013: superiority vs. zoledronic acid rejected; non-inferiority accepted | 2009: co-commercialised by Amgen and GSK; Dec 2015: Amgen reacquires all marketing rights in Australia. |
| Novartis            | Zoledronic acid (Aclasta)                                                                      | Yes                                                              | July 2008: <i>Authority Required</i> <sup>e</sup> cost-minimisation vs. alendronate; Nov 2008: listing extended: women aged 70+; BMD T-score ≤ -3.0<br>Nov 2009: extended to men<br>July 2011: 3-year limit removed; listing changed to <i>Streamlined Authority</i>                                        |                                                                                                         |
|                     | Oestradiol/norethisterone (Estalis continuous)                                                 | Yes                                                              | <i>General Schedule</i> <sup>c</sup>                                                                                                                                                                                                                                                                        |                                                                                                         |

| Company                   | Drug for condition (brand)                                                  | PBS subsidy?(Y/N)          | PBAC decisions and rationale for restrictions                                                                                                                                                                                                | Notes                                                                               |
|---------------------------|-----------------------------------------------------------------------------|----------------------------|----------------------------------------------------------------------------------------------------------------------------------------------------------------------------------------------------------------------------------------------|-------------------------------------------------------------------------------------|
| Servier                   | Strontium (Protos)                                                          | No (previously subsidised) | July 2015: restricted to severe established osteoporosis, patients unable to use other drugs, without cardiovascular contraindications<br>Aug 2016: delisted due to cardiac risks                                                            |                                                                                     |
| Sanofi                    | Risedronic acid (Actonel, Actonel Ec, Actonel Ec Combi, Actonel Ec Combi D) | Yes                        | Feb 2001: postmenopausal osteoporosis; minimal fracture trauma; <i>cost-minimisation</i> vs. alendronate<br>Dec 2001 - extended to corticosteroid-induced osteoporosis<br>March 2013: extended to patients aged 70 + BMD T-score $\leq$ -2.5 | Dec 2014: Sanofi transfers marketing rights to Actavis                              |
| <b>Overactive bladder</b> |                                                                             |                            |                                                                                                                                                                                                                                              |                                                                                     |
| Astellas                  | Mirabegron (Betmiga)                                                        | No                         | N/A. No request made for PBS listing                                                                                                                                                                                                         |                                                                                     |
| CSL and Astellas          | Solifenacin (Vesicare)                                                      | No                         | July 2007: uncertain clinical benefit and cost-effectiveness                                                                                                                                                                                 | Feb 2011 – Oct 2014: marketed by CSL<br>Oct 2014: Astellas regains marketing rights |

- Immediate release quetiapine products are not indicated for major depressive disorder (MDD) or general anxiety disorder, only Seroquel XR.
- Cost-minimisation*: product is considered non-inferior in safety and efficacy to listed comparator; no higher pricing allowed.
- General Schedule*: no prior authority required.
- Streamlined Authority*: no prior approval required, but a streamlined authority code is required on the prescription; if quantities and/or repeats exceed specified levels, treated as *Authority Required*.
- Authority Required*: telephone or written approval required from Department of Health prior to prescribing.

*Abbreviations*: BMD = bone mineral density; GSK= GlaxoSmithKline; MDD = major depressive disorder; PBAC = Pharmaceutical Benefits Advisory Committee; PBS = Pharmaceutical Benefits Scheme

**Table 3: Illustrative examples of verbatim descriptions of sponsored events**

| Sponsor     | Date  | Event content                                                                                                                                                                                                                             | Venue                                                  | Professionals Present                                                  | Hospitality                                                                    | Total Cost  |
|-------------|-------|-------------------------------------------------------------------------------------------------------------------------------------------------------------------------------------------------------------------------------------------|--------------------------------------------------------|------------------------------------------------------------------------|--------------------------------------------------------------------------------|-------------|
| Servier     | 05/12 | 120 minute presentation including a discussion on Valdoxan specific patient cases                                                                                                                                                         | The Sebel Resort, Windsor, NSW                         | 26 Advanced Trainees, Hospital Pharmacists, Psychiatrists              | Dinner, including alcoholic and non-alcoholic beverages                        | \$4138.84   |
| Astrazeneca | 08/14 | Educational dinner meeting for General Practitioners with a specialist presentation on The Anxious Depressed Patient.<br>1 hour educational content                                                                                       | Kimberly Gardens St Kilda East VIC                     | 35 GPs, Psychiatrists                                                  | Dinner with alcoholic and non alcoholic beverages                              | \$3,750.00  |
| GSK         | 06/15 | HCP Osteoporosis presentation. Providing HCPs with the confidence to switch appropriate patients from bis-phosphonates to Prolia. GSK was not responsible for organising the educational content. Duration of Educational Content: 2 hour | GG Restaurant, 105 Yarra St, Geelong VIC 3220          | 38 GPs, Endocrinologists                                               | Three Course Dinner, Juice / Water, Non Alcoholic Beverage, Alcoholic Beverage | \$4,136.5   |
| Astellas    | 04/14 | Educational Dinner Meeting. Prof Philip Van Kerrebroeck giving educational launch presentation on BETMIGA, the new oral treatment in the management of Over Active Bladder. One hour educational content.                                 | The Terrace Room (Private Dining), L'Aqua, Sydney, NSW | 10 leading specialists with an interest in OAB - especially Urologists | Food & Beverages                                                               | \$11,742.95 |



Figure 1: Percent of events sponsored by each company, in total and per condition\*

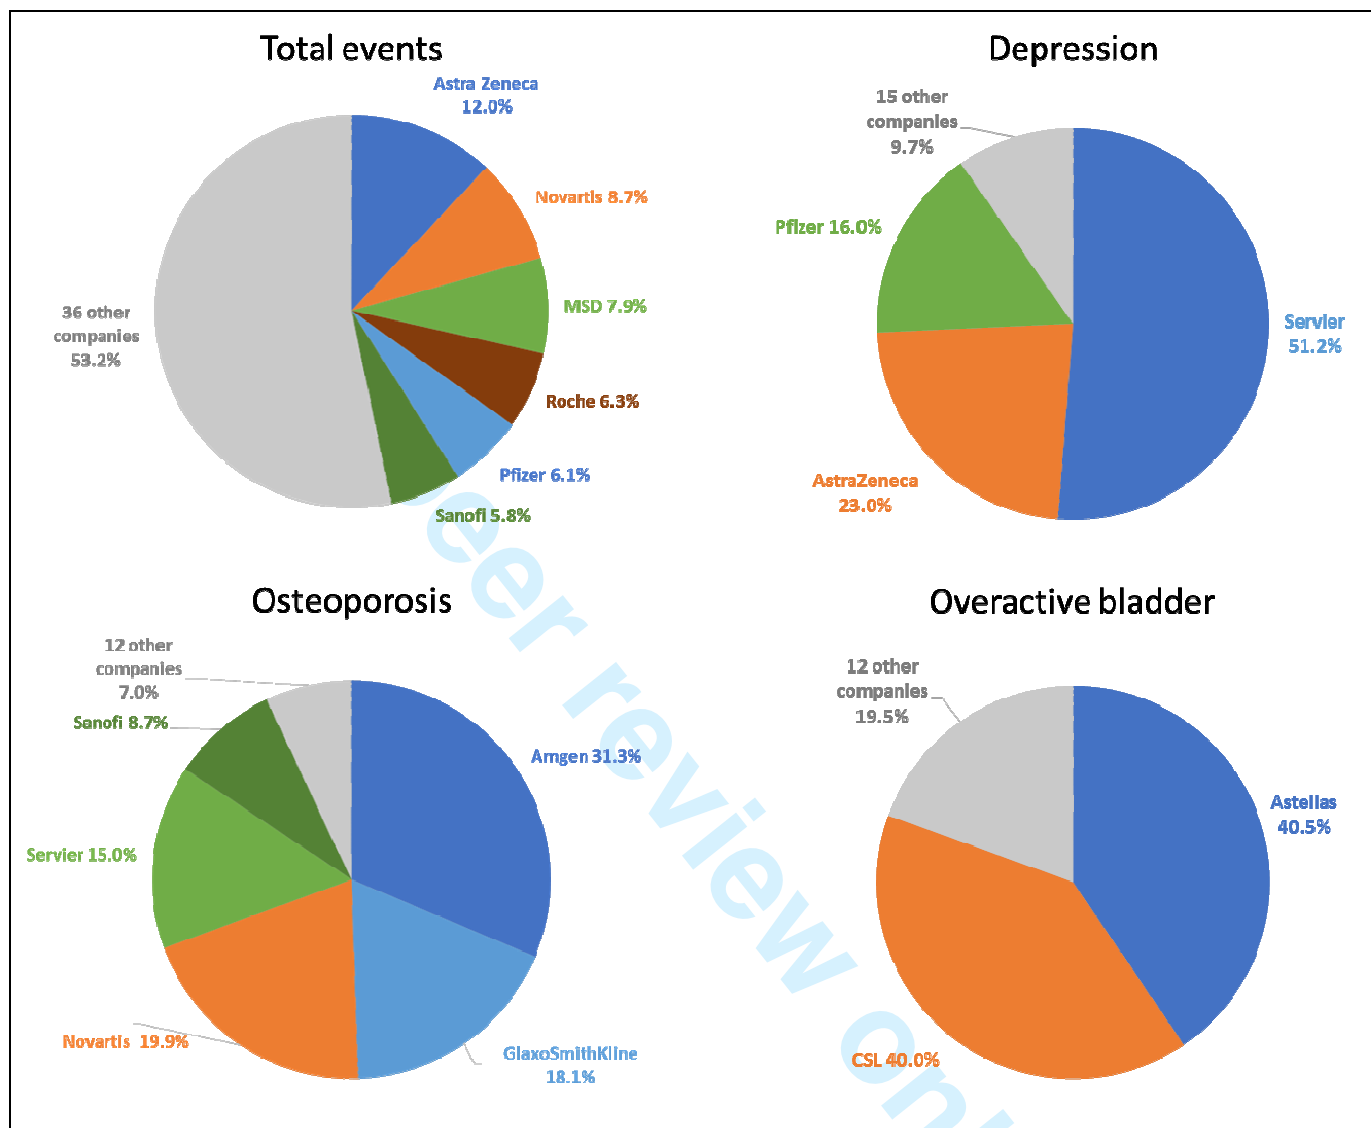

\* All companies sponsoring  $\geq 5\%$  of events are listed.

Figure 2: Invitation for an AstraZeneca sponsored event

**The Anxious,  
Depressed Patient**

Dr Ian Katz,  
Consultant Psychiatrist,  
Monash Hospital

**Wednesday 6<sup>th</sup> August 2014**  
6.45pm – 9.30pm

**Kimberly Gardens**  
441 Inkerman Street,  
St Kilda East

For more information, please contact one  
of your AstraZeneca representatives:  
Emily Armstrong on 0410 589 102  
Brian Kent on 0434 327 898

Your personal information ("information") will be collected and used by AstraZeneca Pty Ltd ("AstraZeneca") and Australian CoCo Pty Ltd its events ("events") to register you for this event, for follow-up purposes and for any other purpose described in AstraZeneca's Privacy Policy at events. Privacy Policy (see below for links). AstraZeneca and events may collect your information from third parties such as travel agents to organize travel arrangements for an event and from each other. AstraZeneca and events may disclose your information to one another, their related entities or to their service providers (including IT support/service providers). Some of these related entities and service providers may be located overseas including in the US, European Union and Asia Pacific. If you do not provide your information, AstraZeneca and events will not be able to register you for this event. Please refer to our Privacy Policies at [www.astrazeneca.com.au/privacy-policy](http://www.astrazeneca.com.au/privacy-policy) and [www.coco.com.au/privacy-policy](http://www.coco.com.au/privacy-policy) for more information about how your information is handled and how you may need to access or correct your information, or submit a privacy complaint. AstraZeneca's address is Alma Road, North Ryde, NSW, 2113 and events's address is Level 5, 35 Bury Street, North Sydney, NSW, 2060.

AstraZeneca Pty Ltd, Alma Road, North Ryde 2113  
ABN 54 000 662 311

**The Anxious,  
Depressed Patient**

**Wednesday, 6<sup>th</sup> August 2014**  
6.45pm – 9.30pm

**Kimberly Gardens**  
441 Inkerman Street,  
St Kilda East

**AstraZeneca**  
Neuroscience

Available at : <http://ajmf.org.au/wp-content/uploads/2014/07/AJMF-VIC-Aug-2014-meeting-Kimberly-Gardens2.pdf>. Accessed January 27, 2016. An advertisement with the same image ran in the May 20, 2013 issue of the *Medical Journal of Australia*.

## On-line Appendix:

## Mintzes et al. How does industry-sponsored education market overdiagnosed conditions? A cohort study of depression, osteoporosis and overactive bladder events in Australia

**Appendix Table 1:**  
**Coding of event characteristic and audience variables**

| Variable name                | Keyword search                                                                                                                                                                                                                                                                                                                                                                                                                                                                                                                                                                                                                                                                                                                                                                                                                                                                                                                                                                                                                                                                                                                                                                                                                                                                                                                |
|------------------------------|-------------------------------------------------------------------------------------------------------------------------------------------------------------------------------------------------------------------------------------------------------------------------------------------------------------------------------------------------------------------------------------------------------------------------------------------------------------------------------------------------------------------------------------------------------------------------------------------------------------------------------------------------------------------------------------------------------------------------------------------------------------------------------------------------------------------------------------------------------------------------------------------------------------------------------------------------------------------------------------------------------------------------------------------------------------------------------------------------------------------------------------------------------------------------------------------------------------------------------------------------------------------------------------------------------------------------------|
| COMPANY                      | A. Menarini Australia Pty Ltd; Abbott Australasia Pty Ltd OR AbbVie Pty Ltd; Actelion Pharmaceuticals Australia Pty Ltd; Alexion Pharmaceuticals Australasia PTY LTD; Allergan Australia Pty Ltd; Amgen Australia; Astellas Pharma Australia Pty Ltd; Astrazeneca Pty Ltd; Baxter Healthcare Pty Ltd; Bayer Australia Ltd; Besins Healthcare Australia; BioCeuticals; Biogen Idec Australia Pty Limited; Boehringer Ingelheim Pty Limited; Bristol-Myers Squibb Australia Pty Limited; Celgene Pty Ltd; CSL (includes also bioCSL Australia Pty Ltd and CSL Behring); Eisai Australia Pty Ltd; Eli Lilly Australia Pty Ltd; Fresenius Kabi Australia; Gilead Sciences Pty.; GlaxoSmithKline Australia Pty Ltd *+ (GSK); iNova Pharmaceuticals (Aus) Pty Ltd; IPSEN Pty Ltd; Janssen; LEO Pharma Pty Ltd; Lundbeck Australia; Merck Serono Australia Pty Ltd; MSD Australia Pty Ltd; Mundipharma Pty Ltd; Mylan EPD; Norgine Pty Limited; Novartis Pharmaceuticals Australia Pty Limited (includes also Alcon Laboratories); Novo Nordisk Pharmaceuticals; Pfizer Australia; Roche Products Pty Limited; Sanofi/Sanofi Aventis Australia Pty Ltd; Servier Laboratories (Australia) Pty Ltd; Shire Australia; Takeda Pharmaceuticals Australia Pty Ltd (includes also Nycomed Pty Ltd Report); UCB Pharma; Vifor Pharma Pty Ltd |
| LOCATION                     |                                                                                                                                                                                                                                                                                                                                                                                                                                                                                                                                                                                                                                                                                                                                                                                                                                                                                                                                                                                                                                                                                                                                                                                                                                                                                                                               |
| New South Wales              | NSW, New South Wales, Sydney, other cities or suburbs, and postal codes of NSW*                                                                                                                                                                                                                                                                                                                                                                                                                                                                                                                                                                                                                                                                                                                                                                                                                                                                                                                                                                                                                                                                                                                                                                                                                                               |
| Victoria                     | VIC, Victoria, Melbourne, other cities or suburbs and postal codes of VIC*                                                                                                                                                                                                                                                                                                                                                                                                                                                                                                                                                                                                                                                                                                                                                                                                                                                                                                                                                                                                                                                                                                                                                                                                                                                    |
| Australian Capital Territory | ACT, Australian Capital Territory, Canberra, other cities or suburbs, and postal codes of ACT*                                                                                                                                                                                                                                                                                                                                                                                                                                                                                                                                                                                                                                                                                                                                                                                                                                                                                                                                                                                                                                                                                                                                                                                                                                |
| Western Australia            | WA, Western Australia, Perth, other cities or suburbs, and postal codes of WA*                                                                                                                                                                                                                                                                                                                                                                                                                                                                                                                                                                                                                                                                                                                                                                                                                                                                                                                                                                                                                                                                                                                                                                                                                                                |

| Variable name                                                                                                                                                                                                                                                                                                                                                        | Keyword search                                                                                                                                                                                                                                                                                                                                                                                |
|----------------------------------------------------------------------------------------------------------------------------------------------------------------------------------------------------------------------------------------------------------------------------------------------------------------------------------------------------------------------|-----------------------------------------------------------------------------------------------------------------------------------------------------------------------------------------------------------------------------------------------------------------------------------------------------------------------------------------------------------------------------------------------|
| South Australia                                                                                                                                                                                                                                                                                                                                                      | SA, South Australia, Adelaide, other cities or suburbs, and postal codes of SA*                                                                                                                                                                                                                                                                                                               |
| Northern Territory                                                                                                                                                                                                                                                                                                                                                   | NT, North Territory, other cities or suburbs, and postal codes of NT*                                                                                                                                                                                                                                                                                                                         |
| Tasmania                                                                                                                                                                                                                                                                                                                                                             | TAS, Tasmania, Hobart, other cities or suburbs, and postal codes of Tasmania*                                                                                                                                                                                                                                                                                                                 |
| Overseas                                                                                                                                                                                                                                                                                                                                                             | Overseas: outside of Australia**                                                                                                                                                                                                                                                                                                                                                              |
| *Where the state or capital was not listed, events were hand coded based on postal codes, cities or suburbs                                                                                                                                                                                                                                                          |                                                                                                                                                                                                                                                                                                                                                                                               |
| **Events not taking place in an Australian state were hand-coded                                                                                                                                                                                                                                                                                                     |                                                                                                                                                                                                                                                                                                                                                                                               |
| <b>MEALS</b>                                                                                                                                                                                                                                                                                                                                                         |                                                                                                                                                                                                                                                                                                                                                                                               |
| • Lunch                                                                                                                                                                                                                                                                                                                                                              | Lunch                                                                                                                                                                                                                                                                                                                                                                                         |
| • Dinner                                                                                                                                                                                                                                                                                                                                                             | Dinner                                                                                                                                                                                                                                                                                                                                                                                        |
| • Breakfast                                                                                                                                                                                                                                                                                                                                                          | Breakfast                                                                                                                                                                                                                                                                                                                                                                                     |
| • Tea                                                                                                                                                                                                                                                                                                                                                                | Afternoon tea, morning tea, light refreshments, light meals, sandwiches & drinks, coffee cart, snack and beverage, sushi                                                                                                                                                                                                                                                                      |
| • All day events w/ meals                                                                                                                                                                                                                                                                                                                                            | Day delegate package*; conference package**                                                                                                                                                                                                                                                                                                                                                   |
| • Food unspecified                                                                                                                                                                                                                                                                                                                                                   | food & beverages, meals, drinks, in hospital catering, beverages, wine                                                                                                                                                                                                                                                                                                                        |
| • No meals provided                                                                                                                                                                                                                                                                                                                                                  | Sponsorship/accommodation only, no hospitality provided, travel/accommodation only (domestic events)                                                                                                                                                                                                                                                                                          |
| *Note: "day delegate package" consisted of entries where multiple meals were listed ((Lunch, tea), (Breakfast, tea), (Dinner, tea), (Breakfast, lunch, tea))                                                                                                                                                                                                         |                                                                                                                                                                                                                                                                                                                                                                                               |
| **Note: "conference package" consisted of events lasting multiple days and typically included a day delegate package, often accommodation (food and beverage not reported separately), registration (food and beverage not reported separately), or travel (including flights, registration, airfares, accommodation and food and beverages not reported separately) |                                                                                                                                                                                                                                                                                                                                                                                               |
| <b>EVENTS HELD IN CLINICAL SETTING</b>                                                                                                                                                                                                                                                                                                                               | Hospital; clinic; practice; medicare local; health centre; surgery; medical centre; medical; health care centre; specialist centre; cancer centre; cancer care centre; heart centre; medical and dental centre; endocrine centre; radiotherapy centre; radiation centre; optical centre; eye centre; renal unit; ward; department; dept; community health; family planning; education centre. |
| <b>PROFESSIONAL STATUS</b>                                                                                                                                                                                                                                                                                                                                           |                                                                                                                                                                                                                                                                                                                                                                                               |
| • Primary care doctors                                                                                                                                                                                                                                                                                                                                               | GP; general practitioner; family medicine.                                                                                                                                                                                                                                                                                                                                                    |

| Variable name         | Keyword search                                                                                                                                                                                                                                                                                                                                                                                                                                                                                                                                                                                                                                                                                                                                                                                                                                                                                                                                                                                                                                                                                                                                                                                                                 |
|-----------------------|--------------------------------------------------------------------------------------------------------------------------------------------------------------------------------------------------------------------------------------------------------------------------------------------------------------------------------------------------------------------------------------------------------------------------------------------------------------------------------------------------------------------------------------------------------------------------------------------------------------------------------------------------------------------------------------------------------------------------------------------------------------------------------------------------------------------------------------------------------------------------------------------------------------------------------------------------------------------------------------------------------------------------------------------------------------------------------------------------------------------------------------------------------------------------------------------------------------------------------|
| • Nurses              | Nurse                                                                                                                                                                                                                                                                                                                                                                                                                                                                                                                                                                                                                                                                                                                                                                                                                                                                                                                                                                                                                                                                                                                                                                                                                          |
| • Pharmacists         | Pharmacist                                                                                                                                                                                                                                                                                                                                                                                                                                                                                                                                                                                                                                                                                                                                                                                                                                                                                                                                                                                                                                                                                                                                                                                                                     |
| • Trainees            | Registrar; resident; intern; student; advanced trainee; RMO; resident medical officer; JHO; SHO; senior house officer; PHO; principal house officer; fellow                                                                                                                                                                                                                                                                                                                                                                                                                                                                                                                                                                                                                                                                                                                                                                                                                                                                                                                                                                                                                                                                    |
| • Specialty care      | Specialist; consultant; senior medical officer; SMO; visiting medical officer; VMO; general medicine; general physician; *ology physician; *ology doctor; allergist; allergy physician; anesthesiologist; anesthetist; anaesthesiologist; anaesthetist; andrologist; cardiologist; dermatologist, diabetologist; emergency physician; emergency medicine physician; endocrinologist; epileptologist; gastroenterologist; geriatrician; getriatric physician; gynaecologist; obstetrician; OB/GYN; haematologist; hematologist; hepatologist; immunologist; infectious disease physician; infectious disease doctor; internal medicine physician; microbiologist; neonatologist; neurologist; nuclear medicine physician; nephrologist; renal physician; renal doctor; urologist; oncologist; pharmacologist; pulmonologist; psychogeriatrician; ophthalmologist; rheumatologist; radiologist; respiratory physician; respiratory medicine physician; respiratory medicine doctor; palliative care physician; pathologist; sexual health physician; sexual health doctor; psychiatrist; psychiatry doctor; paediatrician; surgeon; surgery doctor; intensive care doctor; intensivist; intensive care physician; cardiothoracic |
| <b>CLINICAL FOCUS</b> |                                                                                                                                                                                                                                                                                                                                                                                                                                                                                                                                                                                                                                                                                                                                                                                                                                                                                                                                                                                                                                                                                                                                                                                                                                |
| • Allergy/Immunology  | Allergist; allergy; immunologist; immunology                                                                                                                                                                                                                                                                                                                                                                                                                                                                                                                                                                                                                                                                                                                                                                                                                                                                                                                                                                                                                                                                                                                                                                                   |
| • Anaesthesiology     | Anesthesiologist; anesthetist; anaesthesiologist; anaesthetist; anaesthesiology                                                                                                                                                                                                                                                                                                                                                                                                                                                                                                                                                                                                                                                                                                                                                                                                                                                                                                                                                                                                                                                                                                                                                |
| • Andrology           | Andrologist                                                                                                                                                                                                                                                                                                                                                                                                                                                                                                                                                                                                                                                                                                                                                                                                                                                                                                                                                                                                                                                                                                                                                                                                                    |
| • Cardiology          | Cardiologist; cardiology                                                                                                                                                                                                                                                                                                                                                                                                                                                                                                                                                                                                                                                                                                                                                                                                                                                                                                                                                                                                                                                                                                                                                                                                       |
| • Dermatology         | Dermatologist; dermatology                                                                                                                                                                                                                                                                                                                                                                                                                                                                                                                                                                                                                                                                                                                                                                                                                                                                                                                                                                                                                                                                                                                                                                                                     |
| • Emergency           | Emergency                                                                                                                                                                                                                                                                                                                                                                                                                                                                                                                                                                                                                                                                                                                                                                                                                                                                                                                                                                                                                                                                                                                                                                                                                      |
| • Endocrinology       | endocrinologist; endocrinology; diabetologist; diabetology; diabetes                                                                                                                                                                                                                                                                                                                                                                                                                                                                                                                                                                                                                                                                                                                                                                                                                                                                                                                                                                                                                                                                                                                                                           |
| • Gastroenterology    | Gastroenterologist; gastroenterology; Hepatologist; hepatology                                                                                                                                                                                                                                                                                                                                                                                                                                                                                                                                                                                                                                                                                                                                                                                                                                                                                                                                                                                                                                                                                                                                                                 |
| • Geriatrics          | Geriatrician; geriatric; psychogeriatrician; elderly                                                                                                                                                                                                                                                                                                                                                                                                                                                                                                                                                                                                                                                                                                                                                                                                                                                                                                                                                                                                                                                                                                                                                                           |
| • Haematology         | Haematologist; haematology; hematology; hematologist                                                                                                                                                                                                                                                                                                                                                                                                                                                                                                                                                                                                                                                                                                                                                                                                                                                                                                                                                                                                                                                                                                                                                                           |

| Variable name                                                                                                | Keyword search                                                                                                                    |
|--------------------------------------------------------------------------------------------------------------|-----------------------------------------------------------------------------------------------------------------------------------|
| • Infectious Diseases                                                                                        | Infectious disease; microbiologist; microbiology                                                                                  |
| • Internal Medicine                                                                                          | Internal medicine                                                                                                                 |
| • Intensive care                                                                                             | Intensive care; intensivist; critical care                                                                                        |
| • Neonatology                                                                                                | Neonatologist; neonatology; NICU; neonatal                                                                                        |
| • Nuclear medicine                                                                                           | Nuclear medicine                                                                                                                  |
| • Nephrology                                                                                                 | Nephrologist, nephrology; renal; kidney                                                                                           |
| • Neurology                                                                                                  | Neurologist; neurology; epileptologist                                                                                            |
| • Obstetrics/Gynaecology                                                                                     | Gynaecologist; gynaecology; obstetrician; OB/GYN; obstetrics                                                                      |
| • Oncology                                                                                                   | Oncologist; oncology; cancer                                                                                                      |
| • Ophthalmology                                                                                              | Ophthalmologist; ophthalmology                                                                                                    |
| • Otolaryngology                                                                                             | Otolaryngology                                                                                                                    |
| • Palliative care                                                                                            | Palliative care                                                                                                                   |
| • Pathology                                                                                                  | Pathologist; pathology                                                                                                            |
| • Pharmacology                                                                                               | Pharmacologist; pharmacology                                                                                                      |
| • Paediatrics                                                                                                | Paediatrician; paediatric*; pediatric*                                                                                            |
| • Psychiatry                                                                                                 | Psychiatrist; psychiatry; mental health                                                                                           |
| • Radiology                                                                                                  | Radiologist; radiology                                                                                                            |
| • Rheumatology                                                                                               | Rheumatologist; rheumatology                                                                                                      |
| • Respiratory medicine                                                                                       | Lung specialist; respiratory; pulmonologist                                                                                       |
| • Sexual health                                                                                              | Sexual health                                                                                                                     |
| • Surgery                                                                                                    | Surgeon; surgery; surgical; operating theatre                                                                                     |
| • Urology                                                                                                    | Urologist; urology                                                                                                                |
| *Note: clinical focus is a proxy variable based on clinical specialty of attendees and/or event description. |                                                                                                                                   |
| EVENT TYPE                                                                                                   |                                                                                                                                   |
| • Meeting (not otherwise specified)                                                                          | Search for generic word "meeting"                                                                                                 |
| • Journal club                                                                                               | Journal club; journalclub                                                                                                         |
| • Inservice                                                                                                  | Inservice                                                                                                                         |
| • Workshop                                                                                                   | Workshop                                                                                                                          |
| • Grand rounds                                                                                               | Grand round; grandround                                                                                                           |
| • Scientific meeting                                                                                         | scientific meeting; congress; conference AND NOT videoconference/teleconference                                                   |
| • Clinical meeting                                                                                           | internal meeting; departmental meeting; clinical meeting; case review, case conference; case study meeting; case study conference |
| • Multidisciplinary meeting                                                                                  | Multidisciplinary meeting                                                                                                         |

Appendix Table 2:

## Coding of three included conditions

| Variable name      | Keyword search                                                                                                                                                                                                                                                                                                                                                                                                                                                                                                                                                                                    |
|--------------------|---------------------------------------------------------------------------------------------------------------------------------------------------------------------------------------------------------------------------------------------------------------------------------------------------------------------------------------------------------------------------------------------------------------------------------------------------------------------------------------------------------------------------------------------------------------------------------------------------|
| DEPRESSION         | Depress; Anx; Citalopram; Sertraline; Agomelatine; Vortioxetine; Amitriptyline; Clomipramine; Desvenlafaxine; Dothiepin; Doxepin; Duloxetine; Escitalopram; Fluoxetine; Fluvoxamine; Imipramine; Miaserin; Mirtazapine; Moclobemide; Paroxetine; Reboxetine; Tranylcypromine; Trimipramine; Venlafaxine; Brintellix; Valdoxan; Cymbalta; Anafranil; Pristiq; Sinequan; Andepra; Prozac; Tolvon; Avanza; Mirtazon; Remero; Edronax; Zoloft; Xydep; Altven; Efexor                                                                                                                                  |
| OSTEOPOROSIS       | osteop; bone health; bone disease; metabolic bone disease; mineral bone disease; bone mineral; mineral bone; bone and calcium; fracture; Bisphosphonate; Denosumab; Zolendronic acid; Cinacalcet; Teriparatide; Alendronic acid; Alendronate; Cholecalciferol; Calcitriol; Calcium chloride; Disodium Pamidronate; Ibandronate; Raloxifene; Risedronate ; Salcatonin; Sodium Clodronate; Strontium ranelate; Tiludronate; Prolia; Forteo; Sensipar; Adronat; Fosamax; Dronalen; Rocaltrol; Risedronate; Aredia; Bondronat; Evifyne; Evista; Miacalcic; Protos; Skelid; Aclasta; Osteovan; Zometa. |
| OVERACTIVE BLADDER | Incontinence; Overactive AND bladder; Over active AND bladder; Betmiga; Darifenacin; Oxybutynin; Propantheline; Solifenacin; Tolterodine; Mirabegron; Ditropan; Vesicare; Detrusitol                                                                                                                                                                                                                                                                                                                                                                                                              |

Appendix Table 3:

## Top 5 sponsoring companies in total and per condition

| Company      | Number of events (% of category) | Number of attendees (% of category) | Total cost of food and beverage (\$AUD) | Total cost of functions (\$AUD) | Mean total cost per event (SD) (AUD\$) | Median total cost per event (IQR) (AUD\$) |
|--------------|----------------------------------|-------------------------------------|-----------------------------------------|---------------------------------|----------------------------------------|-------------------------------------------|
| General      | 116,845                          | 3,481,750                           | 84,862,791                              | 286,117,928                     | 2,449.70 (SD=15,020)                   | 263 (153-1,195)                           |
| AstraZeneca  | 13,968 (12.0%)                   | 435,686 (12.5%)                     | 12,725,027.09 (15.0%)                   | 31,766,776 (11.1%)              | 2,274 (SD=10,878)                      | 318 (165-2,261)                           |
| Novartis     | 10,120 (8.7%)                    | 244,069 (7.0%)                      | 6,600,502.76 (7.8%)                     | 27,467,246 (9.6%)               | 2,714 (SD=16,109)                      | 270 (167-1,154)                           |
| MSD          | 9,142 (7.8%)                     | 214,621 (6.2%)                      | 5,388,246.54 (6.4%)                     | 18,352,116 (6.4%)               | 2,007 (SD=9,274)                       | 341 (180-1,182)                           |
| Roche        | 7,383 (6.3%)                     | 174,878 (5.0%)                      | 2,891,426.00 (3.4%)                     | 16,625,126 (5.8%)               | 2,252 (SD=22,101)                      | 186 (129-284)                             |
| Pfizer       | 7,125 (6.1%)                     | 188,439 (5.4%)                      | 3,740,677.35 (4.4%)                     | 18,464,785 (6.5%)               | 2,591 (SD=21,482)                      | 236 (141-573)                             |
| Depression   | 1,567                            | 41,472                              | 2,441,950                               | 6,259,581                       | 3,995 (SD=15,895)                      | 1,941 (659 – 3,264)                       |
| Servier      | 803 (51.2%)                      | 19,671 (47.4%)                      | 1,497,510 (61.3%)                       | 3,757,665 (60.0%)               | 4,680 (SD=1,7837)                      | 2,164 (921 - 3,145)                       |
| AstraZeneca  | 361 (23.0%)                      | 9,577 (23.1%)                       | 551,985 (22.6%)                         | 1,269,764 (20.3%)               | 3,517 (SD =5,306)                      | 1,082 (126-2,045)                         |
| Pfizer       | 251 (16.0%)                      | 5,160 (12.4%)                       | 182,306 (7.5%)                          | 326,255 (5.2%)                  | 1,300 (SD=1,846)                       | 420 (195-1,978)                           |
| Eli Lilly    | 57 (3.6%)                        | 1,175 (2.8%)                        | 28,902 (1.2%)                           | 47,485 (0.8%)                   | 833 (SD=1,591)                         | 165 (75-950)                              |
| Janssen      | 33 (2.1%)                        | 974 (2.35%)                         | 5,760 (0.24%)                           | 56,953 (0.91%)                  | 1,726 (SD=5,788)                       | 187 (106-273)                             |
| Osteoporosis | 1,375                            | 33,916                              | 2,314,319                               | 6,073,333                       | 4,417 (SD=21,611)                      | 686 (217-2,500)                           |
| Amgen        | 431 (31.4%)                      | 10,120 (29.84%)                     | 943,254 (40.8%)                         | 2,114,304 (34.8%)               | 4,906 (SD=29,502)                      | 259 (175-630)                             |
| Novartis     | 274 (19.9%)                      | 5,735 (16.91%)                      | 308,064 (13.3%)                         | 971,212 (16.0%)                 | 3,545 (SD=16,701)                      | 369 (159-2,011)                           |
| GSK          | 249 (18.1%)                      | 5,273 (15.55%)                      | 474,364 (20.5%)                         | 928,803 (15.3%)                 | 3,730 (SD=11,982)                      | 2,354 (1,500-3,532)                       |
| Servier      | 206 (15.0%)                      | 4,344 (12.81%)                      | 283,954.11 (12.3%)                      | 523,699.04 (8.6%)               | 2,542 (SD=6,636)                       | 1,647 (546-2,939)                         |



| Company              | Number of events (% of category) | Number of attendees (% of category) | Total cost of food and beverage (\$AUD) | Total cost of functions (\$AUD) | Mean total cost per event (SD) (AUD\$) | Median total cost per event (IQR) (AUD\$) |
|----------------------|----------------------------------|-------------------------------------|-----------------------------------------|---------------------------------|----------------------------------------|-------------------------------------------|
| Sanofi               | 119 (8.7%)                       | 3,798 (11.20%)                      | 100,970.91 (4.4%)                       | 190,200.21 (3.1%)               | 1,598 (SD=3,205)                       | 440 (120-1,755)                           |
| Overactive bladder   | 190                              | 21,270                              | 467,096                                 | 1,136,665                       | 5,951 (SD=41,070)                      | 2,024 (773-3,379)                         |
| Astellas             | 77 (40.5%)                       | 2,294 (10.8%)                       | 113,572 (24.3%)                         | 209,663.47 (18.5%)              | 2,723 (SD=2,616)                       | 2,277 (1,568-2,956)                       |
| CSL                  | 76 (40.0%)                       | 1,950 (9.2%)                        | 94,902 (20.3%)                          | 181,431 (16.0%)                 | 2,387 (SD=2,399)                       | 1,664.50 (169-3,579)                      |
| AstraZeneca          | 9 (4.7%)                         | 194 (0.9%)                          | 3,802 (0.8%)                            | 11,911 (1.0%)                   | 1,323 (SD=883)                         | 795.07 (795-1,778)                        |
| Allergan             | 6 (3.2%)                         | 681 (3.2%)                          | 14,068 (3.0%)                           | 54,569 (4.8%)                   | 9,095 (SD=6,445)                       | 10,654 (1,389-15,148)                     |
| Bristol-Myers Squibb | 6 (3.2%)                         | 2,710 (12.7%)                       | 900 (0.2%)                              | 66,400 (5.8%)                   | 11,067 (SD=7,645)                      | 16,000 (1,350-16,000)                     |

Appendix Figure 1:

Osteoporosis-related events sponsored by Sanofi

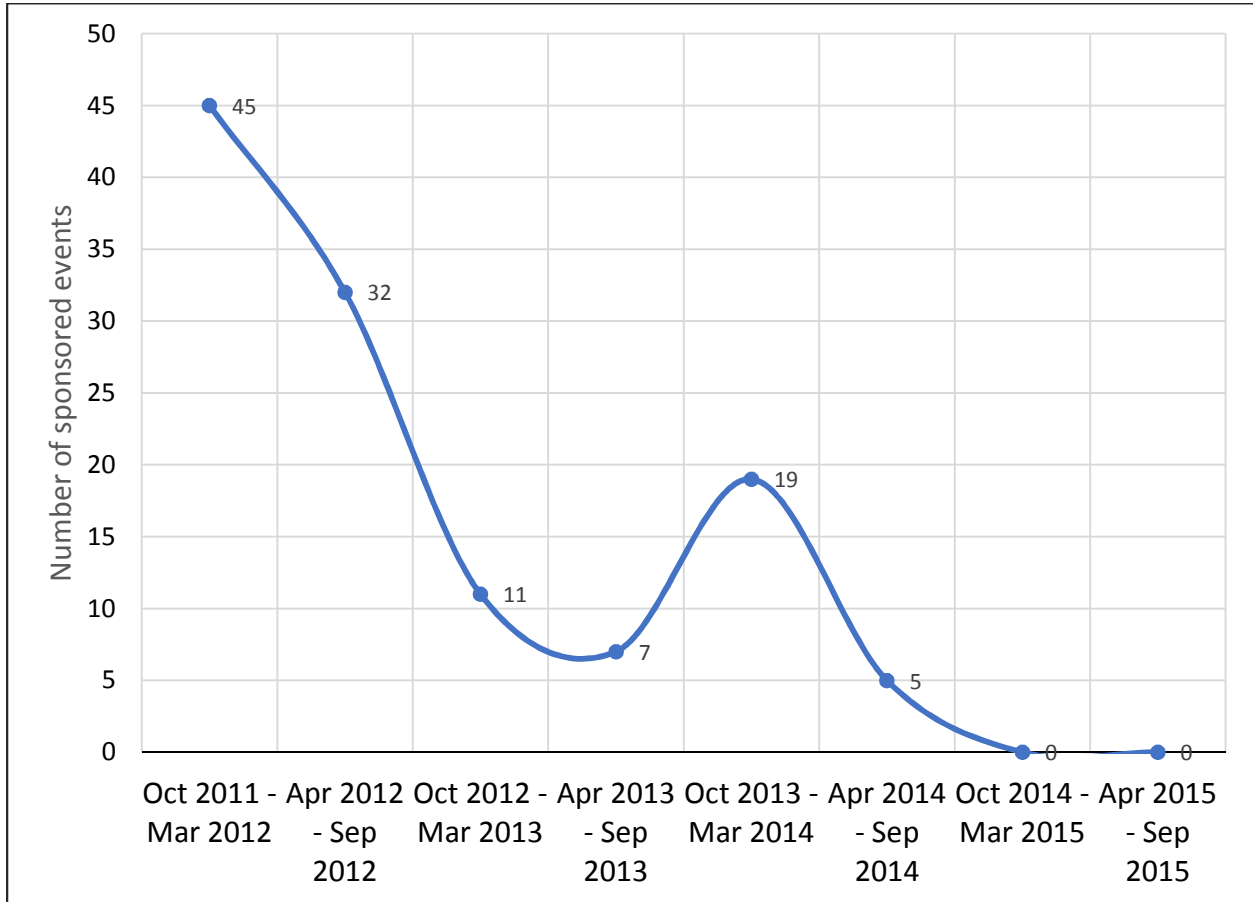

only

## Appendix Figure 2:

## Event sponsorship over the study period by lead overactive bladder sponsors

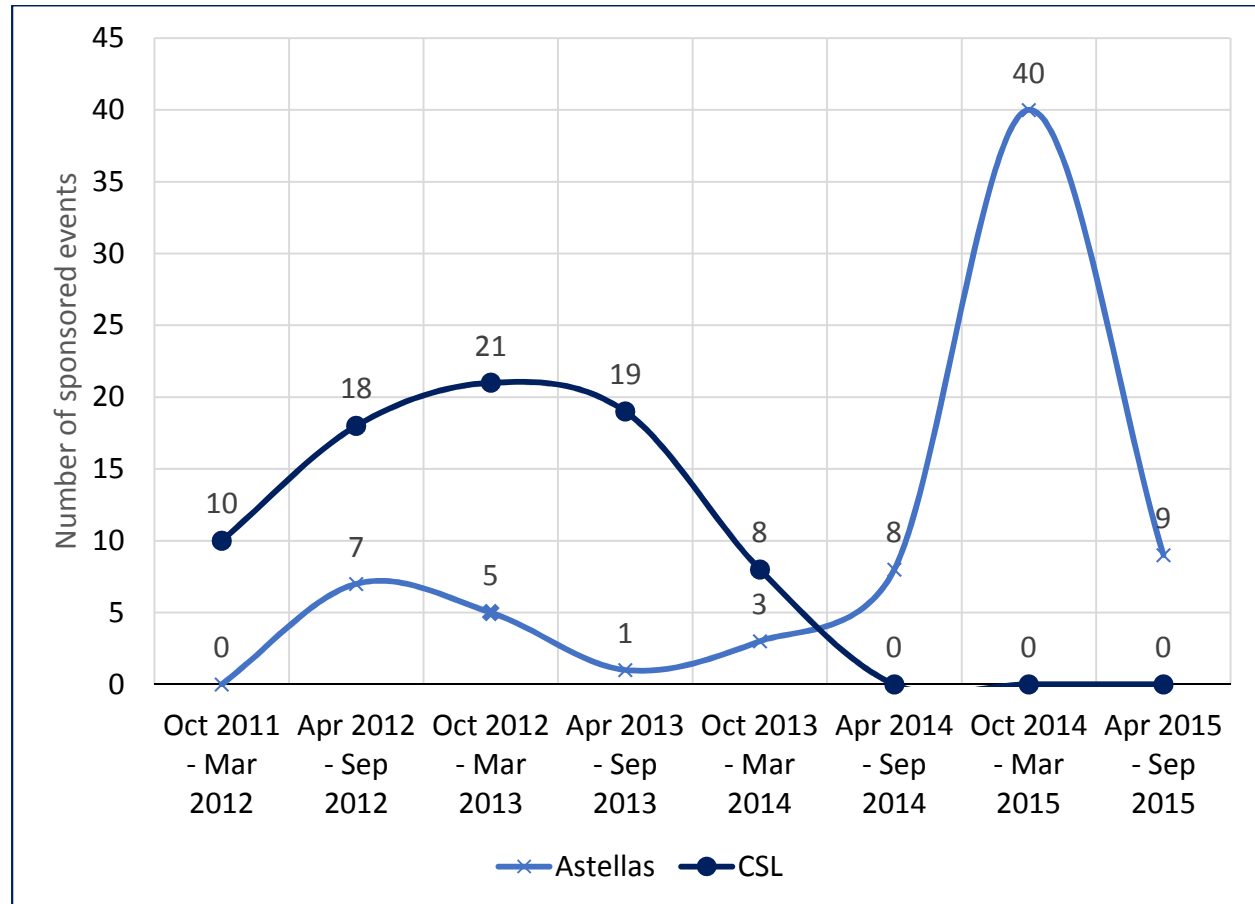

*Note:* CSL marketed solifenacin in Australia from February 2011 to October 2014, when marketing rights shifted to Astellas. Astellas also markets mirabegron, approved in Australia in February 2014.

Appendix Figure 3: Product sales over the study period

Figure 3.1: Annual sales of agomelatine, quetiapine for depression (Seroquel XR) and other formulations of quetiapine (Sequase, Seroquel)

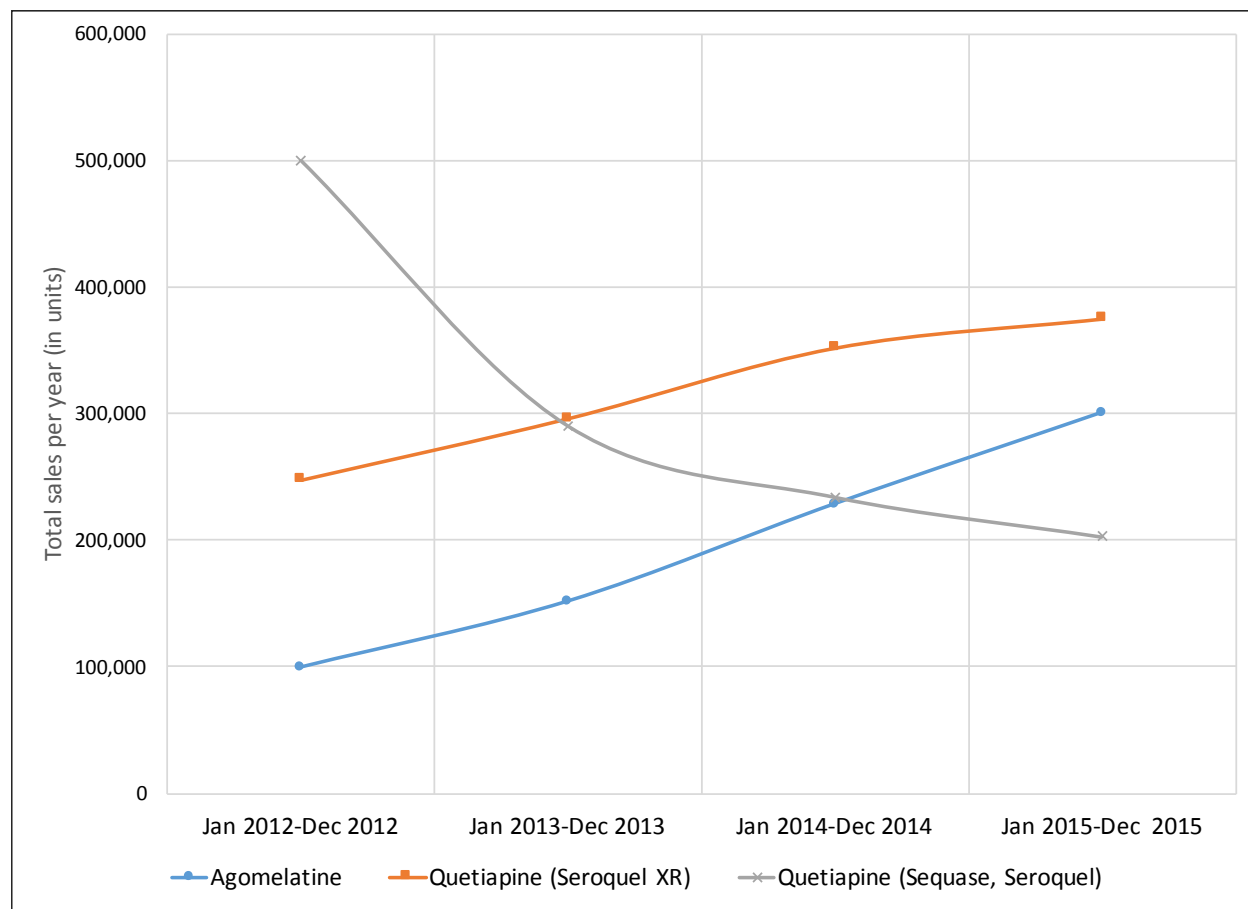

Agomelatine: 1 unit = 28 days@ 25mg/day; quetiapine (Seroquel XR, Sequase, Seroquel): 1 unit = 60 days (various doses) Source: IMS Quintiles

Appendix Figure 3.2

Number of scripts dispensed for osteoporosis drugs, Pharmaceutical Benefits Scheme (PBS)

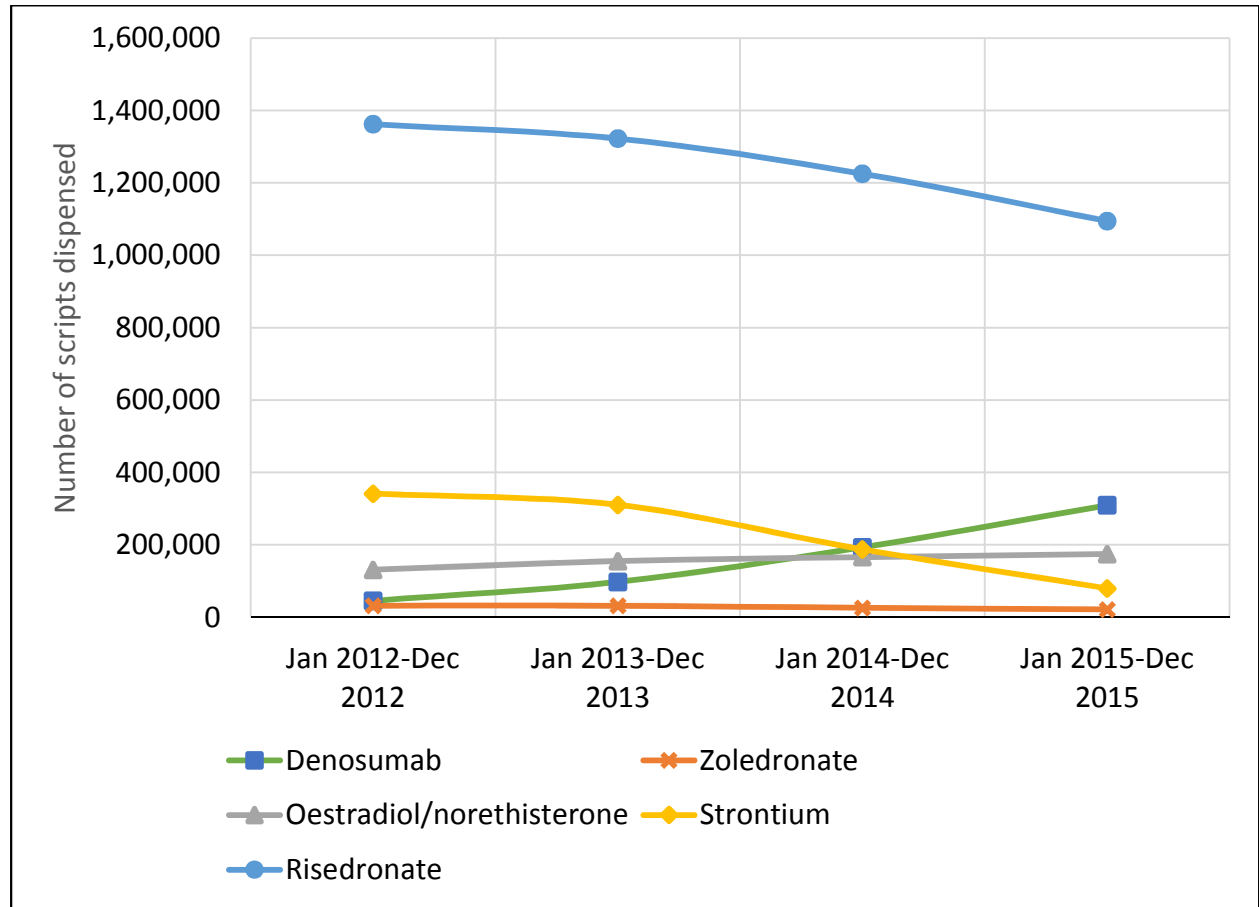

Source: Australian Statistics on Medicines 2012 to 2015. Available at: <https://www.pbs.gov.au/info/browse/statistics#ASM>

Appendix Figure 3.3: Sales of non-PBS funded overactive bladder drugs

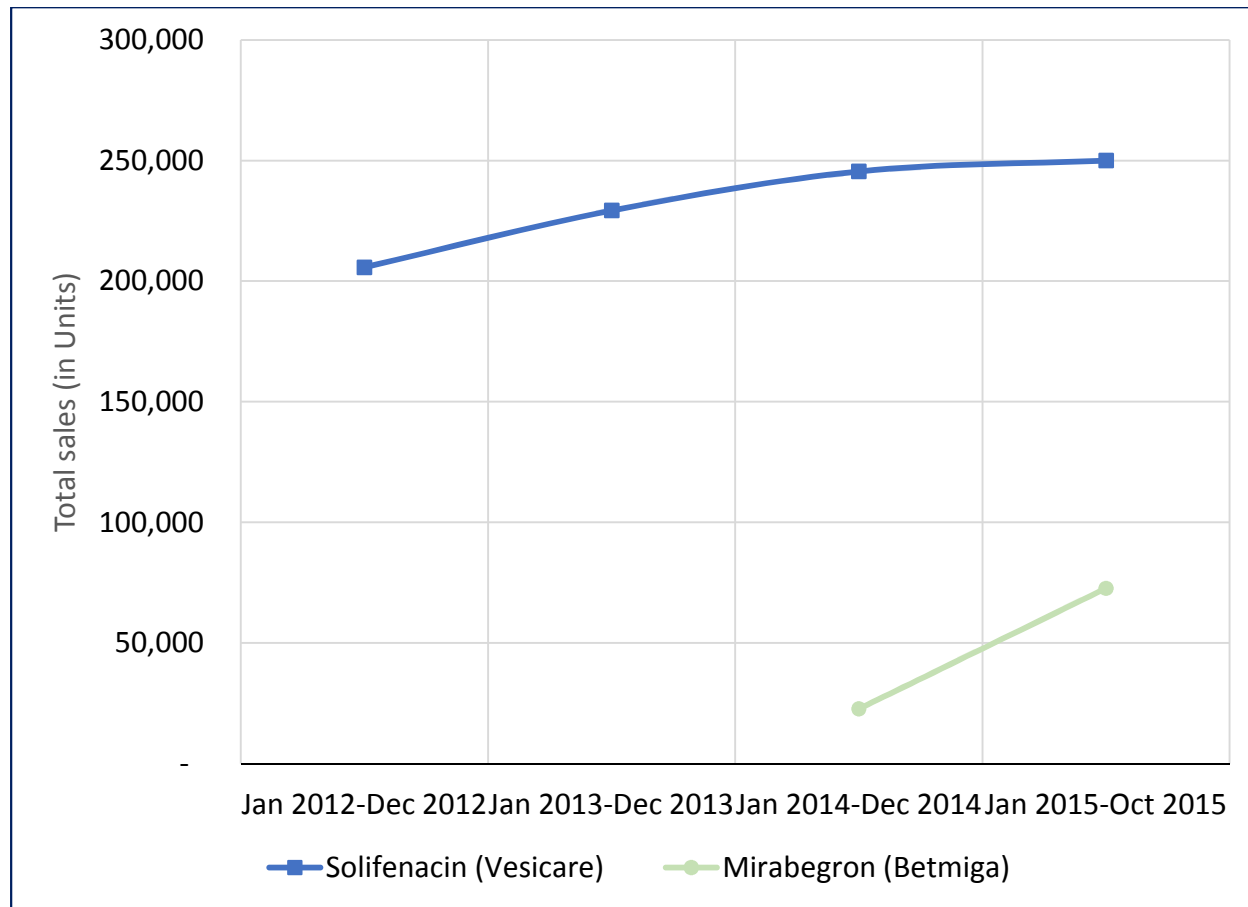

Mirabegron: 1 unit =30 days@ 25mg/day; solifenacin: 30 days@ 5mg or 10mg/day. Source: IMS Quintiles

STROBE Statement—Checklist of items that should be included in reports of *cohort studies*

|                              | Item No | Recommendation                                                                                                                                                                                                    | Page number                                                                |
|------------------------------|---------|-------------------------------------------------------------------------------------------------------------------------------------------------------------------------------------------------------------------|----------------------------------------------------------------------------|
| <b>Title and abstract</b>    | 1       | (a) Indicate the study's design with a commonly used term in the title or the abstract                                                                                                                            | Title page                                                                 |
|                              |         | (b) Provide in the abstract an informative and balanced summary of what was done and what was found                                                                                                               | Abstract                                                                   |
| <b>Introduction</b>          |         |                                                                                                                                                                                                                   |                                                                            |
| Background/rationale         | 2       | Explain the scientific background and rationale for the investigation being reported                                                                                                                              | Page 4-5                                                                   |
| Objectives                   | 3       | State specific objectives, including any prespecified hypotheses                                                                                                                                                  | Page 5                                                                     |
| <b>Methods</b>               |         |                                                                                                                                                                                                                   |                                                                            |
| Study design                 | 4       | Present key elements of study design early in the paper                                                                                                                                                           | Page 5                                                                     |
| Setting                      | 5       | Describe the setting, locations, and relevant dates, including periods of recruitment, exposure, follow-up, and data collection                                                                                   | Page 5                                                                     |
| Participants                 | 6       | (a) Give the eligibility criteria, and the sources and methods of selection of participants. Describe methods of follow-up<br>(b) For matched studies, give matching criteria and number of exposed and unexposed | Page 6-7; on-line appendix tables 1&2                                      |
| Variables                    | 7       | Clearly define all outcomes, exposures, predictors, potential confounders, and effect modifiers. Give diagnostic criteria, if applicable                                                                          | Page 5-6 (drug data);<br>On-line appendix tables 1 & 2 (event codes)       |
| Data sources/<br>measurement | 8*      | For each variable of interest, give sources of data and details of methods of assessment (measurement). Describe comparability of assessment methods if there is more than one group                              | Page 5-6 (drug data);<br>On-line appendix tables 1 & 2 (event codes)       |
| Bias                         | 9       | Describe any efforts to address potential sources of bias                                                                                                                                                         | Page 7: coder was blinded to sponsor, attendees and event characteristics. |
| Study size                   | 10      | Explain how the study size was arrived at                                                                                                                                                                         | N/A<br>Population-based                                                    |
| Quantitative variables       | 11      | Explain how quantitative variables were handled in the analyses. If applicable, describe which groupings were chosen and why                                                                                      | Pages 5-7.<br>Quantitative variables were based on coding above.           |
| Statistical methods          | 12      | (a) Describe all statistical methods, including those used to control for confounding                                                                                                                             | Page 7                                                                     |
|                              |         | (b) Describe any methods used to examine subgroups and interactions                                                                                                                                               | N/A                                                                        |
|                              |         | (c) Explain how missing data were addressed                                                                                                                                                                       | N/A                                                                        |
|                              |         | (d) If applicable, explain how loss to follow-up was addressed                                                                                                                                                    | N/A                                                                        |
|                              |         | (e) Describe any sensitivity analyses                                                                                                                                                                             |                                                                            |
| <b>Results</b>               |         |                                                                                                                                                                                                                   |                                                                            |
| Participants                 | 13*     | (a) Report numbers of individuals at each stage of study—eg                                                                                                                                                       | N/A                                                                        |

|                          |     |                                                                                                                                                                                                              |                                |
|--------------------------|-----|--------------------------------------------------------------------------------------------------------------------------------------------------------------------------------------------------------------|--------------------------------|
|                          |     | numbers potentially eligible, examined for eligibility, confirmed eligible, included in the study, completing follow-up, and analysed                                                                        |                                |
|                          |     | (b) Give reasons for non-participation at each stage                                                                                                                                                         |                                |
|                          |     | (c) Consider use of a flow diagram                                                                                                                                                                           |                                |
| Descriptive data         | 14* | (a) Give characteristics of study participants (eg demographic, clinical, social) and information on exposures and potential confounders                                                                     | N/A                            |
|                          |     | (b) Indicate number of participants with missing data for each variable of interest                                                                                                                          |                                |
|                          |     | (c) Summarise follow-up time (eg, average and total amount)                                                                                                                                                  |                                |
| Outcome data             | 15* | Report numbers of outcome events or summary measures over time                                                                                                                                               | Pages 7-9 and on-line appendix |
| Main results             | 16  | (a) Give unadjusted estimates and, if applicable, confounder-adjusted estimates and their precision (eg, 95% confidence interval). Make clear which confounders were adjusted for and why they were included | Pages 7-9 and on-line appendix |
|                          |     | (b) Report category boundaries when continuous variables were categorized                                                                                                                                    | N/A                            |
|                          |     | (c) If relevant, consider translating estimates of relative risk into absolute risk for a meaningful time period                                                                                             | Page 7                         |
| Other analyses           | 17  | Report other analyses done—eg analyses of subgroups and interactions, and sensitivity analyses                                                                                                               | N/A                            |
| <b>Discussion</b>        |     |                                                                                                                                                                                                              |                                |
| Key results              | 18  | Summarise key results with reference to study objectives                                                                                                                                                     | Page 10                        |
| Limitations              | 19  | Discuss limitations of the study, taking into account sources of potential bias or imprecision. Discuss both direction and magnitude of any potential bias                                                   | Page 10-11                     |
| Interpretation           | 20  | Give a cautious overall interpretation of results considering objectives, limitations, multiplicity of analyses, results from similar studies, and other relevant evidence                                   | Page 11                        |
| Generalisability         | 21  | Discuss the generalisability (external validity) of the study results                                                                                                                                        | Page 11                        |
| <b>Other information</b> |     |                                                                                                                                                                                                              |                                |
| Funding                  | 22  | Give the source of funding and the role of the funders for the present study and, if applicable, for the original study on which the present article is based                                                | Page 13                        |

\*Give information separately for exposed and unexposed groups.

**Note:** An Explanation and Elaboration article discusses each checklist item and gives methodological background and published examples of transparent reporting. The STROBE checklist is best used in conjunction with this article (freely available on the Web sites of PLoS Medicine at <http://www.plosmedicine.org/>, Annals of Internal Medicine at <http://www.annals.org/>, and Epidemiology at <http://www.epidem.com/>). Information on the STROBE Initiative is available at <http://www.strobe-statement.org>.



# BMJ Open

## Does industry-sponsored education foster overdiagnosis and overtreatment of depression, osteoporosis and overactive bladder syndrome? An Australian cohort study

|                                 |                                                                                                                                                                                                                                                                                                                                                                                                                                                                                                                                                        |
|---------------------------------|--------------------------------------------------------------------------------------------------------------------------------------------------------------------------------------------------------------------------------------------------------------------------------------------------------------------------------------------------------------------------------------------------------------------------------------------------------------------------------------------------------------------------------------------------------|
| Journal:                        | <i>BMJ Open</i>                                                                                                                                                                                                                                                                                                                                                                                                                                                                                                                                        |
| Manuscript ID                   | bmjopen-2017-019027.R1                                                                                                                                                                                                                                                                                                                                                                                                                                                                                                                                 |
| Article Type:                   | Research                                                                                                                                                                                                                                                                                                                                                                                                                                                                                                                                               |
| Date Submitted by the Author:   | 25-Oct-2017                                                                                                                                                                                                                                                                                                                                                                                                                                                                                                                                            |
| Complete List of Authors:       | Mintzes, Barbara; University of Sydney Faculty of Health Sciences, Faculty of Pharmacy and Charles Perkins Centre<br>Swandari, Swestika; Ministry of Health, Makassar, Indonesia, Makassar Health Training Centre<br>Fabbri, Alice; University of Insubria, Centre for Research in Medical Pharmacology<br>Grundy, Quinn; The University of Sydney, Charles Perkins Centre and Faculty of Pharmacy<br>Moynihan, Ray; Bond University, Faculty of Health Sciences and Medicine<br>Bero, Lisa; University of Sydney Faculty of Health Sciences, Pharmacy |
| <b>Primary Subject Heading</b>: | Health policy                                                                                                                                                                                                                                                                                                                                                                                                                                                                                                                                          |
| Secondary Subject Heading:      | Medical education and training, Evidence based practice, Pharmacology and therapeutics                                                                                                                                                                                                                                                                                                                                                                                                                                                                 |
| Keywords:                       | Health policy < HEALTH SERVICES ADMINISTRATION & MANAGEMENT, Quality in health care < HEALTH SERVICES ADMINISTRATION & MANAGEMENT, MEDICAL EDUCATION & TRAINING, Depression & mood disorders < PSYCHIATRY, Urinary incontinences < UROLOGY, Musculoskeletal disorders < ORTHOPAEDIC & TRAUMA SURGERY                                                                                                                                                                                                                                                   |
|                                 |                                                                                                                                                                                                                                                                                                                                                                                                                                                                                                                                                        |

SCHOLARONE™  
Manuscripts

1  
2  
3 **Does industry-sponsored education foster overdiagnosis and overtreatment of depression,**  
4 **osteoporosis and overactive bladder syndrome? An Australian cohort study**  
5  
6  
7  
8  
9

10 Barbara Mintzes, Swestika Swandari, Alice Fabbri, Quinn Grundy, Ray Moynihan, Lisa Bero

11  
12  
13 **Author affiliations**  
14

15 Barbara Mintzes, Senior Lecturer, Charles Perkins Centre and Faculty of Pharmacy,  
16 The University of Sydney, Camperdown NSW 2006, Australia  
17  
18

19 Swestika Swandari, Trainer, Makassar Health Training Centre, Ministry of Health, Makassar,  
20 Indonesia  
21  
22

23 Alice Fabbri, PhD student, Centre for Research in Medical Pharmacology, University of Insubria,  
24 Varese, 21100, Italy  
25  
26  
27

28 Quinn Grundy, Postdoctoral Research Fellow, Charles Perkins Centre and Faculty of Pharmacy,  
29 The University of Sydney, Camperdown NSW 2006, Australia  
30  
31  
32

33 Ray Moynihan, Senior Research Fellow, Faculty of Health Sciences and Medicine, Bond University,  
34 QLD 4229, Australia  
35  
36  
37

38 Lisa A Bero, Professor, Charles Perkins Centre and Faculty of Pharmacy, The University of Sydney,  
39 Camperdown NSW 2006, Australia  
40  
41  
42

43  
44 **Corresponding author:**  
45

46 Dr. Barbara Mintzes,

47 Email: [Barbara.mintzes@sydney.edu.au](mailto:Barbara.mintzes@sydney.edu.au)

48  
49 Tel: +61 (0) 2 8627 0827  
50  
51

52 **Copyright:** The Corresponding Author has the right to grant on behalf of all authors and does  
53 grant on behalf of all authors, an exclusive licence (or non exclusive for government employees)  
54 on a worldwide basis to the BMJ Publishing Group Ltd to permit this article (if accepted) to be  
55  
56  
57  
58  
59  
60

1  
2  
3 published in BMJ editions and any other BMJ PGL products and subpublications such use and exploit  
4 all subsidiary rights, as set out in our licence.  
5  
6

7  
8 **Contributors:** BM initiated the study, designed the data coding approach and plans for analysis,  
9 assisted with the development of the coding scheme, carried out analyses, and drafted and  
10 revised the paper. She is the guarantor. SS and AF contributed to the study design and coding  
11 scheme, carried out data coding and analysis, and revised the draft paper; QG, RM and LB  
12 contributed to the study design and coding scheme and revised the draft paper.  
13  
14  
15

16  
17  
18 **Competing interests:** All authors have completed the ICMJE uniform disclosure form at  
19 [www.icmje.org/coi\\_disclosure.pdf](http://www.icmje.org/coi_disclosure.pdf) (available on request from the corresponding author). Dr.  
20 Mintzes reports that she was an expert witness on behalf of plaintiffs in a Canadian class action  
21 suit concerning cardiovascular risks of a testosterone gel. None of the other authors report any  
22 financial relationships with organisations that might have an interest in the submitted report in  
23 the previous three years. None of the authors have received any financing from pharmaceutical  
24 manufacturers. The authors declare no other relationships or activities that could appear to have  
25 influenced the submitted work.  
26  
27  
28  
29  
30  
31

32  
33  
34 **Transparency:** As guarantor, Dr Mintzes affirms that the manuscript is an honest, accurate, and  
35 transparent account of the study being reported; that no important aspects of the study have been  
36 omitted; and that any discrepancies from the study as planned have been explained.  
37  
38  
39

40  
41 **Funding:** The University of Sydney Faculty of Pharmacy provided summer scholarship funding  
42 for Swestika Swandari for work that contributed to this study. The authors received no additional  
43 support from any organisation for the submitted work.  
44  
45  
46

47 **Data sharing:** The dataset used for this analysis is publicly available at the following link:

48 <http://dx.doi.org/10.4227/11/592631edbd9d5>  
49  
50

51  
52 **Ethical approval:** Not required.  
53

54 **Article word count:** 3414; 3 tables, 2 figures, 1 on-line appendix  
55  
56  
57  
58  
59

1  
2  
3 **Abstract: [300 words]**  
4

5 **Objectives:** to investigate patterns of industry sponsored educational events that focus on  
6 specific health conditions for which there are concerns about overdiagnosis and overtreatment.  
7  
8

9  
10 **Design and Setting:** This retrospective cohort study examines publicly reported industry-  
11 sponsored events in Australia from October 2011 to September 2015 for three conditions  
12 potentially subject to overdiagnosis and overtreatment: depression, osteoporosis, and overactive  
13 bladder. We used a database of transparency reports to identify events with a focus on  
14 depression, osteoporosis and overactive bladder and compared these with other sponsored  
15 events. We hypothesised that companies marketing treatments for each condition would sponsor  
16 related events and that target audiences would mainly work in primary care, reflecting a broad  
17 patient population.  
18  
19

20 **Main outcome measures:** Event and attendee characteristics, sponsoring companies, related  
21 marketed treatments, cost-effectiveness ratings and dispensing rates.  
22  
23

24  
25 **Results:** Over the study period, we identified 1,567 events focusing on depression, 1,375 on  
26 osteoporosis and 190 on overactive bladder (total n= 3,132, with 96,660 attendees). These events  
27 were attended by primary care doctors more often than sponsored events without a focus on  
28 these three conditions: relative risk (RR) = 3.06 (95% CI 2.81 – 3.32) for depression, RR= 1.48  
29 (95% CI 1.41-1.55) for osteoporosis, and RR= 2.59 (95% CI 2.09-3.21) for overactive bladder.  
30 Servier, which markets agomelatine and AstraZeneca (quetiapine) sponsored 51.2% and 23.0%  
31 of depression events respectively. Amgen and GSK, which co-market denosumab, sponsored  
32 49.5% of osteoporosis events, and Astellas and CSL (mirabegron and solifenacin) sponsored  
33 80.5% of overactive bladder events.  
34  
35

36  
37 **Conclusions:** This 4-year overview of industry-sponsored events on three overdiagnosed and  
38 overtreated conditions found that primary care clinicians were often targeted, dinner was often  
39 provided, and that a few companies sponsored most events. In most cases, sponsors' products are  
40 not cost-effective choices for the specified condition. This pattern highlights the need for  
41 professional education to be free of commercial sponsorship.  
42  
43  
44  
45  
46  
47  
48  
49  
50  
51  
52  
53  
54  
55  
56  
57  
58  
59  
60

### Strengths and limitations of this study

- Australia's transparency reports of industry funding of health professionals were unique internationally until 2015, in that the focus was on sponsored events.
- This is the first data-driven national analysis of condition-specific industry educational event sponsorship for overdiagnosed and overtreated conditions.
- Classification of events was blinded to sponsor, attendee characteristics, and event descriptions.
- For each condition, we examined trends over time in sales and dispensing of lead sponsors' relevant marketed drugs, but we could not assess causal links between increased prescribing and event attendance, as no information was publicly available on the identity of individual event participants.
- Limited detail was available on the content of sponsored events; therefore, despite a sensitive search, we may have missed some relevant events per condition

1  
2  
3 1 [3414 words]  
4  
5

6 2 **Introduction**  
7

8  
9 3 The role of pharmaceutical industry sponsorship of health professional education has been  
10 4 subject to considerable controversy. There is disagreement about whether sponsored education is  
11 5 primarily promotional or educational. It has been described on the one hand as, “marketing  
12 6 masquerading as education”, (1) and on the other, if accompanied by proper controls, as able to  
13 7 meet the goal of, “needs based, relevant, accessible education that is balanced and unbiased and  
14 8 improves health care outcomes.” (2)  
15  
16  
17  
18  
19

20 9 This controversy extends not only to how treatment outcomes are discussed, but also to how  
21 10 conditions are defined. Messages in commercially-sponsored education may exaggerate  
22 11 prevalence and/or attempt to medicalise aspects of ordinary life. Identified “marketing messages”  
23 12 in continuing medical education (CME) for low female sexual desire included statements that it  
24 13 is “very common and underdiagnosed”, and that, “women may not be aware that they are sick or  
25 14 distressed.” (3) Similarly, United States (U.S.) CME sponsored by a testosterone manufacturer  
26 15 supported a broader definition of hypogonadism than in listed indications for testosterone. (4)  
27  
28  
29  
30  
31  
32  
33

34 16 A sponsored CME campaign can reach many health professionals, with potential widespread  
35 17 effects on practice. Purdue Pharma’s launch of the opioid analgesic oxycodone in the U.S.  
36 18 included over 20,000 sponsored educational events, many of which targeted GPs, potentially  
37 19 contributing to more opioid use in primary care. (5)  
38  
39  
40  
41

42 20 These are product-specific examples of sponsored CME that received media attention and may  
43 21 not reflect broader trends. There has been little exploration of the link between sponsored CME  
44 22 and specific conditions prone to overdiagnosis. Overdiagnosis, the detection of conditions  
45 23 unlikely to lead to ill-health, disability or death in the absence of treatment, has been  
46 24 characterised as a “modern epidemic”. (6, 7) It can lead to harm from adverse effects of  
47 25 treatments from which a person is unlikely to benefit, to psychological harm if a healthy person  
48 26 suffers from anxiety or stigma due to disease labelling, and to harm to society through higher  
49 27 healthcare costs. There is evidence of commercial influence on overdiagnosis in a range of  
50 28 conditions, through direct and indirect marketing aiming to establish the need for a product. (7)  
51  
52  
53  
54  
55  
56  
57  
58  
59  
60

1  
2  
3 1 One consequence of overdiagnosis is overtreatment, as overdiagnosis expands the pool of  
4 2 potentially treatable patients beyond thresholds at which treatment has been shown to be  
5 3 beneficial. The wide ranging influence of industries that benefit from expanded markets has been  
6 4 highlighted as a key driver. (8)  
7  
8  
9

10 5  
11 6 National patterns of industry sponsorship can shed light on controversies concerning the role of  
12 7 sponsored CME. From 2007 to late 2015, members of Medicines Australia, the national  
13 8 pharmaceutical industry trade association, were required by law to report on sponsored events for  
14 9 health professionals. (9) These are described by Medicines Australia as “educational events” and  
15 10 include both accredited CME and a large range of events without accreditation. (10)  
16  
17  
18  
19

20 11  
21 12 Australia was one of the first countries to require the pharmaceutical industry to publicly report  
22 13 financing of hospitality for health professionals. In 2007, the Australian Competition Tribunal  
23 14 required Medicines Australia – who at the time opposed the move – to introduce mandatory  
24 15 disclosure of industry-sponsored events for health professionals following recommendations by  
25 16 the Australian Competition and Consumer Commission (ACCC). Unlike other countries relying  
26 17 on industry self-regulation of drug promotion via national industry associations, Australia has a  
27 18 what could be described as a quasi-regulatory system, requiring approval of self-regulatory  
28 19 standards by a public regulatory body, the ACCC. (11)  
29  
30  
31  
32  
33  
34  
35  
36

37 20 These data provide a unique opportunity to examine the link between condition-specific  
38 21 sponsored events and companies marketing medicines for a condition. Over this 4-year period,  
39 22 116,845 events are described, varying in scope from a half-hour journal club in a hospital  
40 23 meeting room to several-day conferences, sometimes held overseas. (12)  
41  
42  
43  
44

45 24 We report here on event sponsorship with a focus on three conditions highlighted in the medical  
46 25 literature as potentially subject to overdiagnosis and overtreatment: depression, (13) osteoporosis  
47 26 (14), and overactive bladder. (15) We hypothesise that companies marketing drugs for these  
48 27 conditions are more likely to sponsor events with a focus on that condition than other companies.  
49 28 We also hypothesise that these events tend to target a primary care practitioners who are likely to  
50 29 treat milder disease states than specialists. To test these hypotheses, we compare characteristics  
51  
52  
53  
54  
55  
56  
57  
58  
59  
60

1  
2  
3 1 of the events focusing on these three conditions with other events sponsored by companies  
4  
5 2 during the 4-year study period.  
6

7  
8 3 To investigate clinical implications, we examine whether sponsors' products were judged to be  
9  
10 4 cost-effective and are covered under Australia's Pharmaceutical Benefits Scheme's (PBS). The  
11  
12 5 PBS was introduced in 1948 to subsidise the costs of outpatient medicines for the entire  
13  
14 6 Australian population. The aim is to provide affordable access to needed medicines. An expert  
15  
16 7 committee, the Pharmaceutical Benefits Advisory Committee (PBAC) recommends listing of  
17  
18 8 medicines based on cost-effectiveness considerations that include both therapeutic gains and  
19  
20 9 price. Medicines not listed on the PBS tend to have very limited sales.

21  
22 10 We assess sponsorship patterns per condition in terms of audience, clinical versus non-clinical  
23  
24 11 setting, and provision of meals. We examined how often events included company-sponsored  
25  
26 12 dinners as events with dinners provided are often held at restaurants and represent a higher-value  
27  
28 13 gift. For products for which there was a shift in which company held distribution rights over the  
29  
30 14 study period, we also examined timing of event sponsorship in relation to distribution rights.

## 31 **Methods**

### 32 33 ***Data sources***

34  
35  
36 17 We downloaded 301 publicly available company reports covering the period October 2011 to  
37  
38 18 September 2015 from the Medicines Australia website ([www.medicinesaustralia.com.au](http://www.medicinesaustralia.com.au)),  
39  
40 19 converted them from PDF into Excel files, cleaned the data and resolved discrepancies. For  
41  
42 20 example, we removed text from columns that should have contained numeric values only (e.g.  
43  
44 21 total cost) and, for a small minority of events, corrected totals equal to less than reported  
45  
46 22 component costs.

47  
48 23 These reports include the sponsoring company, timing, event description, venue type, number  
49  
50 24 and profession of attendees, hospitality costs and total event costs. Coding methods are described  
51  
52 25 in detail elsewhere. We developed a retrospective cohort of sponsored events based on timing of  
53  
54 26 sponsorship per company over time. A descriptive overview of the data on sponsored events has  
55  
56 27 been published, (12) and the data set used for this analysis is available at:



1 <http://dx.doi.org/10.4227/11/592631edbd9d5>

2 We obtained a list of brands sold in Australia for each condition from the Australian Medicines  
3 Handbook (16) and manufacturers' websites, and annual dispensing data for publicly reimbursed  
4 drugs through Australia's Pharmaceutical Benefit Scheme (PBS)  
5 <http://www.pbs.gov.au/info/browse/statistics#AS>. For non PBS-subsidised drugs, sales volume  
6 data were obtained through QuintilesIMS.

7 We examined volume of use using annual numbers of dispensed prescriptions for PBS-  
8 subsidised drugs and numbers of units sold to retail and hospital pharmacies for non PBS-  
9 subsidised drugs.

### 10 ***Selection of targeted conditions***

11 We chose depression, osteoporosis, and overactive bladder as illustrative case studies of  
12 conditions for which diagnostic thresholds and treatment have extended beyond levels at which  
13 patients are likely to benefit. We selected these conditions *a priori* before carrying out any  
14 analyses.

15 Depression screening leads to many false positives, (17) (18) and many patients prescribed  
16 antidepressants in primary care fail to meet diagnostic criteria for major depression, (19) a  
17 phenomenon that has been described as "medicalising sadness". (13) In 2013, Australia had one  
18 of the highest rates of antidepressant use among OECD countries. (20)

19 Questions have also been raised about diagnostic criteria for osteoporosis and the role of bone  
20 densitometry in greatly expanding the treatable population, primarily when used in screening of  
21 asymptomatic post-menopausal women, but also as a diagnostic tool for women with low trauma  
22 fractures. Bone density screening is poorly predictive of clinical fractures, and a focus on bone  
23 density rather than fragility fractures has led to many more diagnoses. (14) Further treatment  
24 expansion has occurred through lowered thresholds for "pre-osteoporosis" and "osteopenia",  
25 which further extend disease labelling to populations that fail to meet established criteria for a  
26 diagnosis of osteoporosis.

1  
2  
3 1 An “imprecise” symptom-based definition of overactive bladder, largely linked to commercial  
4 interests, has replaced urodynamically confirmed bladder instability. (15) Tolterodine, marketed  
5 by Pharmacia, was the first drug approved for overactive bladder symptoms. In 2002,  
6 Pharmacia’s Vice-President described a threefold expansion of the treatable population through a  
7 definition of overactive bladder no longer requiring urinary incontinence. (21)  
8  
9

10 6 Drug treatments for these three conditions have been heavily advertised to the public in the  
11 United States (US), with advertising that relies heavily on emotional appeals, targets women, and  
12 tends to blur the boundaries between normal life and medical conditions requiring treatment. (22)  
13  
14  
15  
16  
17  
18

### 19 ***Coding of Medicines Australia data on sponsored events***

20  
21  
22 10 An initial coding scheme for industry-sponsored events included sponsoring company, location,  
23 attendee profession, clinical focus, type of hospitality (such as whether meals or travel and  
24 accommodation were provided), and a set of relevant keywords to search unstructured text. (12)  
25  
26 12 We designed an additional coding scheme to identify events focusing on the three included  
27 conditions. The research team iteratively developed keywords based on disease names/symptoms  
28 and drug classes and products sold in Australia (generic and brand names) for each condition.  
29  
30 14 Keywords were used to search unstructured text in the “Description of function” column of  
31 reports. All relevant keywords associated with  $\geq 1$  event listed in the database were retained in  
32 the final coding scheme. (On-line Appendix, Tables 1 and 2) During coding, we concealed other  
33 variables (using Excel’s ‘Column Hide’ function) to blind the coder [SS] to sponsor, attendee  
34 characteristics, and event descriptors.  
35  
36  
37  
38  
39  
40  
41

### 42 ***Analysis***

43  
44  
45 22 For each included condition, we provide a detailed analysis for all companies sponsoring at least  
46 5% of events. We examined whether these companies market drugs to treat the condition, and  
47 PBS reimbursement status for these drugs. We present frequency tables for event and attendee  
48 characteristics. Costs are reported in AUD\$. We performed chi square analyses to compare  
49 events per condition with other sponsored events using SPSS-Version 22.  
50  
51  
52  
53  
54  
55  
56  
57  
58  
59  
60

## 1 **Results**

2 Over the 4-year study period, we identified 3,132 events focusing on the three conditions, with  
3 96,620 attendees. This included 1,567 events with a focus on depression, with 41,474 attendees;  
4 1,375 on osteoporosis with 33,916 attendees; and 190 on overactive bladder with 21,270  
5 attendees. As no individuals are named, we could not ascertain numbers of repeat attendees.  
6 Table 1 summarises event characteristics. Events focusing on these conditions represent 2.7% of  
7 sponsored events (n=116,845) over the 4-year period, and 2.8% of attendees (n=3,481,750). (12)

8 For all three conditions, the median number of event attendees (19-20) was similar to sponsored  
9 events in general. (12) For all three conditions, events were held less often in a clinical setting  
10 (hospital or clinic) than other sponsored events: RR = 0.51 (95% CI 0.50-0.53) for depression;  
11 RR = 0.72 (95% CI 0.68-0.76) for osteoporosis; RR= 0.47 (95% CI 0.43-0.50) for overactive  
12 bladder. Nurses were only at 24.4% of condition-focused events compared with 39.6% of total  
13 events, (12) likely reflecting the less frequent hospital setting. However, attendees were more  
14 likely to be primary care physicians (GPs or family medicine) than at other events: relative risk  
15 (RR) = 3.06 (95% CI 2.81 – 3.32) for depression, RR= 1.48 (95% CI 1.41-1.55) for osteoporosis,  
16 and RR= 2.59 (95% CI 2.09-3.21) for overactive bladder. Depression and osteoporosis events  
17 were also more likely to feature a dinner than other events: RR= 1.73 (95% CI 1.64-1.82) for  
18 depression and RR = 1.33 (95% CI 1.27-1.38) for osteoporosis. This trend was not seen for  
19 overactive bladder.

20 The median cost per attendee was higher than for events in general (AUD\$14): AUD\$104 for  
21 depression, AUD\$52 for osteoporosis, and AUD\$85 for overactive bladder. (Table 1)

22 A few companies sponsored most of these condition-focused events. Figure 1 provides an  
23 overview of companies sponsoring  $\geq 5\%$  of events. All sell at least one drug for the relevant  
24 indication. Table 2 provides an overview of these drugs' PBS funding status. We present  
25 illustrative event descriptions featuring brand names in Table 3, with added details on sponsored  
26 events per company in on-line appendix Table 3.

### 27 *Depression-related events*

1  
2  
3 1 Two companies sponsored > 80% of depression-related events: Servier (51.2% of events), which  
4 2 markets the antidepressant agomelatine and AstraZeneca (23.0% of events), which markets the  
5 3 antipsychotic quetiapine. The extended-release formulation of quetiapine (brand name Seroquel  
6 4 XR) is approved for depression treatment in patients intolerant to other therapies or with  
7 5 inadequate response. Neither agomelatine nor the depression indication for quetiapine are PBS-  
8 6 subsidised. Pfizer, which markets five PBS-subsidised antidepressants (desvenlafaxine,  
9 7 venlafaxine, sertraline, reboxetine, doxepin), was the next most frequent sponsor (16.0% of  
10 8 events).

11 9 We examined agomelatine and quetiapine sales volumes over the study period. Agomelatine  
12 10 sales tripled, from 99,625 units in 2012 to 300,103 units in 2015 (28 days treatment/unit). Sales  
13 11 of the extended-release formulation of quetiapine increased from 247,374 units in 2012 to  
14 12 374,917 in 2015 (60 days treatment/unit). Sales of other AstraZeneca quetiapine formulations  
15 13 decreased over the same period, from 499,445 units sold in 2012 to 202,783 in 2015. (23) (on-  
16 14 line Appendix, Figure 3.1)

17 15 Seventy-nine AstraZeneca events focused on ‘the anxious depressed patient’. Figure 2 is an  
18 16 invitation for one of these events, featuring the same image that was used in an advertisement for  
19 17 extended-release quetiapine that appeared in the *Medical Journal of Australia*. This formulation  
20 18 of quetiapine is also indicated for generalised anxiety disorder.

### 21 19 *Osteoporosis-related events*

22 20 Osteoporosis event sponsorship, similarly, was highly concentrated: Amgen and GSK, which co-  
23 21 market denosumab sponsored 31.3% and 18.1% of events respectively (in total, 49.4%).  
24 22 Novartis, which markets zoledronic acid, and oestradiol/norethisterone, a hormone therapy  
25 23 approved for osteoporosis prevention in high-risk women intolerant of other products, sponsored  
26 24 19.9% of events; Servier, which markets strontium sponsored 15.0%; and Sanofi, which  
27 25 marketed risedronic acid until December 2014, sponsored 8.7%. Denosumab, zoledronic acid,  
28 26 oestradiol/norethisterone, and risedronic acid are PBS-subsidised; strontium was delisted in  
29 27 August 2016 due to cardiac risks.

1  
2  
3 1 Sanofi transferred its marketing rights for risedronate to Actavis in December 2014. (24) Sanofi  
4 sponsored no osteoporosis events from October 2014 onwards. (on-line appendix Figure 3.2)  
5  
6

7  
8 3 Denosumab dispensations increased nearly 7-fold over the study period, from 45,220 in 2012 to  
9 309,350 in 2015. (25) Risedronate, zoledronic acid and strontium dispensations all decreased  
10 (on-line appendix, Figure 3.3) Of 193 events mentioning denosumab's brand name, Prolia, 104  
11 were sponsored by Amgen and 88 by GSK.  
12  
13  
14  
15

### 16 7 *Overactive bladder-related events*

17  
18 8 Two companies dominated sponsorship of overactive bladder events: Astellas (40.5% of events),  
19 which markets mirabegron and solifenacin, the latter after October 2014, and CSL (40.0% of  
20 events), which marketed solifenacin from February 2011 to October 2014. Neither drug is PBS-  
21 subsidised. Astellas did not request PBS reimbursement for mirabegron. PBAC rejected  
22 solifenacin in 2007, judging benefits and cost-effectiveness to be uncertain.  
23  
24  
25  
26  
27

28 13 All CSL-sponsored overactive bladder events occurred while the company held distribution  
29 rights for solifenacin, e.g. to October 2014; most Astellas-sponsored events were held from 2014  
30 onwards, when it obtained marketing rights. (on-line appendix Figure 3.4) Both solifenacin and  
31 mirabegron sales increased over the study period. (on-line appendix, Figure 3.5)  
32  
33  
34  
35

## 36 17 **Discussion**

37  
38  
39 18 In this analysis of 3,132 Australian pharmaceutical industry-sponsored events with 96,660  
40 attendances, focusing on three clinical conditions prone to overdiagnosis, we found a strong  
41 concentration of sponsorship among few companies. Two companies sponsored over 70% of  
42 depression events; another two companies over 80% of overactive bladder events. In  
43 osteoporosis, the two companies that co-market denosumab sponsored nearly 50% of events.  
44  
45  
46  
47  
48

49 23 Several products marketed by key event sponsors were considered unacceptable for PBS  
50 reimbursement, and are associated with cost, efficacy and safety concerns that have been flagged  
51 internationally. Servier, which sponsored over half of depression-related events, sells  
52 agomelatine, which is not PBS-subsidised. Agomelatine is not approved in the U.S. or Canada. A  
53  
54  
55  
56  
57  
58  
59  
26

1  
2  
3 1 French independent drug bulletin, *Prescrire*, characterized the drug as “more dangerous than  
4 useful” and called for its withdrawal in 2015. (26) A Spanish bulletin, similarly, considered it,  
5 2  
6 “worse than first-line antidepressants, up to 15-fold more expensive, and a worrying hepatic  
7 3  
8 safety profile.”(27)  
9 4

10  
11 5 A 2012 Cochrane systematic review found that AstraZeneca’s atypical antipsychotic quetiapine  
12 6 had limited efficacy evidence for depression. (28) An updated systematic review, published in  
13 7  
14 2015, concluded that quetiapine had not been shown to improve function and that  
15 7  
16 methodological biases had exaggerated benefits and minimised harm. (29)  
17 8

18  
19 9 Like agomelatine, denosumab is on the French bulletin *Prescrire*’s list of 71 drugs to avoid in  
20 10  
21 2016 because of “a disproportionate risk of adverse events” including serious infections due to  
22 11  
23 immunosuppression, with only modest efficacy. (30) In 2015, half of all new Australian  
24 12  
25 osteoporosis prescriptions were for denosumab. (31)  
26

27 13 All anticholinergic overactive bladder drugs, including solifenacin, have modest benefits,  
28 14  
29 preventing one incontinence episode on average every two days, with frequent dry mouth and  
30 15  
31 constipation, and there is observational evidence of dementia risk with longer-term use. (32)  
32 16  
33 Mirabegron has similar efficacy to anticholinergics (32) and can lead to severe hypertension.  
34 17  
35 (33)  
36

37 18 This analysis is limited by the data available. Our analysis only includes 2.7% of events, a likely  
38 19  
39 underestimate as not all event descriptions mention a condition. These three conditions are  
40 20  
41 illustrative case studies and cannot be assumed to represent all condition-related sponsored  
42 21  
43 events. A variety of influences are expected to affect sales trends, including a large range of  
44 22  
45 promotional activities. Sponsored events represent only one aspect of broader promotional  
46 23  
47 campaigns to promote sales. (34) However, a strength of this analysis is that it covers all  
48 24  
49 sponsored events in Australia over four years, and coding was blinded to sponsor identity, types  
50 25  
51 of attendees, gifts and costs. Due to the unique Australian dataset, this is the first such data-  
52 26  
53 driven national analysis to examine condition-specific event sponsorship.

54 27 Company reports on financing of sponsored events provided limited information on content,  
55 28  
56 leaving many questions unanswered. More research is needed on the messages in sponsored  
57  
58  
59  
60

1 education, including on thresholds for disease diagnosis and treatment. Additionally, as  
2 individuals were not named, we could not directly evaluate the link between event attendance  
3 and individual prescribing patterns.

4 We could only examine potential contributions to overdiagnosis and overtreatment indirectly.  
5 We had hypothesized that events would focus on primary care, reflecting milder disease states.  
6 This is a hypothesized association only; we could not directly assess whether the messages in  
7 these events promote overdiagnosis or overtreatment. However, nearly two-thirds of events,  
8 62%, for the three conditions were attended by primary care doctors, versus 21% of other events.  
9 The focus on primary care was most pronounced for depression events: 74%.

10 The concentration of sponsorship by companies marketing products subject to safety, cost and  
11 efficacy concerns raises questions about influences on prescribing choice. This pattern is  
12 consistent with Brody and Light's hypothesis of an "inverse benefit law", in which intense  
13 marketing of drugs that may benefit a small proportion of patients is harmful to public health  
14 because a broader patient population is targeted than is likely to benefit. (35)

15 Many of these condition-focused events included dinner and were held in non-clinical settings  
16 such as restaurants. Costs per person were higher than for events in general. Even small gifts,  
17 such as food and drink, can affect behaviour. (36) An analysis of U.S. transparency reports found  
18 that physicians who receive  $\geq 1$  sponsored meal with a mean value of  $< US \$20$  were more likely  
19 to prescribe the promoted product, with larger effects observed the more meals received. (37) We  
20 examined whether overseas travel may have been responsible for higher median costs. In total  
21 ( $n=117,845$ ), 1.9% of events were held overseas, and as expected, these events had the highest  
22 per person costs. However, only 0.1% of depression-related events, 0.4% of osteoporosis-related  
23 events and no overactive bladder events were held overseas. Therefore, this is an unlikely  
24 explanation. Travel costs within Australia are not reported separately from other hospitality  
25 costs, so we could not examine their contribution to overall costs.

26 Timing of sponsorship was linked to when a company sold a drug to treat the included condition,  
27 consistent with a sales orientation. Companies discontinued event sponsorship of overactive  
28 bladder and osteoporosis events when they no longer had marketing rights for a product for these

1  
2  
3 1 conditions. This promotional orientation is consistent with internal documents released during  
4  
5 2 the U.S. legal case on gabapentin, which described the use of CME to market off-label use. (38)  
6  
7

8 3 In this 4-year overview of industry-sponsored events focusing on depression, osteoporosis and  
9  
10 4 overactive bladder, we found concentrated sponsorship among few companies per condition.  
11  
12 5 These companies mainly market products that are not considered cost-effective choices for the  
13  
14 6 specified conditions. This raises concerns about impacts on prescribing quality and on national  
15  
16 7 prescribing trends. There was a strong focus on primary care physicians, frequent provision of  
17  
18 8 dinner, and non-clinical setting. Although a focus on primary care does not necessarily imply  
19  
20 10 rather than narrower patient population. This observed pattern of event sponsorship raises  
21  
22 11 concerns about the role of industry-sponsored education in conditions identified as prone to  
23  
24 12 overdiagnosis, and highlights the need for ensure that professionals have ready access to  
25  
26 13 continuing professional education that is free of commercial sponsorship.  
27

#### 28 **Figure legends:**

29  
30  
31 15 **Figure 1: Percent of events sponsored by each company, in total and per condition\***  
32

33  
34 16 **Figure 2: Invitation for an AstraZeneca sponsored event**  
35  
36 18

37  
38 19 **Acknowledgements:** The authors would like to thank QuintilesIMS for their assistance in  
39  
40 20 providing data on pharmaceutical sales volumes in Australia.  
41  
42 21

43 22  
44  
45 23 **Access to the data:** All authors had full access to all of the data (including statistical reports and  
46  
47 24 tables) in the study and can take responsibility for the integrity of the data and the accuracy of  
48  
49 25 the data analysis.  
50  
51 26

52 27 **Previous presentations:** Preliminary study results were presented at the *Preventing*  
53  
54 28 *Overdiagnosis* conference in Barcelona, Spain, September 2016.  
55  
56 29  
57 30



## References

1. Moynihan R. Doctors' education: the invisible influence of drug company sponsorship. *BMJ*. 2008;336(7641):416-7.
2. Marlow B. Is continuing medical education a drug-promotion tool?: NO. *Canadian Family Physician*. 2007;53(10):1650-2, 4-6.
3. Meixel A, Yanchar E, Fugh-Berman A. Hypoactive sexual desire disorder: inventing a disease to sell low libido. *J Med Ethics*. 2015;41(10):859-62.
4. Fauber J, Jones C, Fiore K. Slippery Slope: Testosterone Muscles Its Way to Profits. *Medpage Today*. October 18, 2015. Available at: <http://www.medpagetoday.com/special-reports/slipperyslope/54156> Accessed January 17, 2017.
5. Spithoff S. Industry involvement in continuing medical education: time to say no. *Canadian Family Physician*. 2014;60(8):694-6, 700-3.
6. Hoffman JR, Cooper, R.J. Overdiagnosis of disease: a modern epidemic. *Arch Intern Med*. 2012;172(15):1123-4.
7. Moynihan R, Heath I, Henry D. Selling sickness: the pharmaceutical industry and disease mongering. *BMJ*. 2002;324(7342):886-91.
8. Moynihan R, Doust J, Henry D. Preventing overdiagnosis: how to stop harming the healthy. *BMJ* 2012; 344:e3502 doi: 10.1136/bmj.e3502
9. Monk D. Improving transparency in the pharmaceutical industry. *Australian Prescriber*. 2016;39(4):110-111.
10. Robertson J, Moynihan R, Walkom E, Bero L, Henry D (2009) Mandatory Disclosure of Pharmaceutical Industry-Funded Events for Health Professionals. *PLoS Med* 6(11): e1000128. doi:10.1371/journal.pmed.1000128

- 1  
2  
3 1 11. Medicines Australia, Code of Conduct Edition 18, 2015.  
4  
5 2 [https://medicinesaustralia.com.au/wp-content/uploads/sites/52/2010/01/20150617-PUB-](https://medicinesaustralia.com.au/wp-content/uploads/sites/52/2010/01/20150617-PUB-Code-Edition-18-FINAL.pdf)  
6  
7 3 [Code-Edition-18-FINAL.pdf](https://medicinesaustralia.com.au/wp-content/uploads/sites/52/2010/01/20150617-PUB-Code-Edition-18-FINAL.pdf)  
8
- 9  
10 4 12. Fabbri A, Grundy, Q, Mintzes B, et al. Pharmaceutical industry-funded events for health  
11 professionals: An analysis of data released under Australian transparency rules. *BMJ Open*  
12 2017;7:e016701. doi:10.1136/bmjopen-2017-016701  
13
- 14  
15 7 13. Dowrick C, Frances A. Medicalising unhappiness: new classification of depression risks  
16 more patients being put on drug treatment from which they will not benefit. *BMJ*. 2013;347.  
17  
18 8
- 19  
20 9 14. Jarvinen TL, Michaelsson K, Jokihaara J, et al. Overdiagnosis of bone fragility in the quest to  
21 prevent hip fracture. *BMJ*. 2015;350:h2088.  
22 10
- 23  
24 11 15. Tikkinen KA, Auvinen A. Does the imprecise definition of overactive bladder serve  
25 commercial rather than patient interests? *Eur Urol*. 2012;61(4):746-8.  
26 12
- 27  
28  
29 13 16. Australian Medicines Handbook. Adelaide, Australia: AMH; 2016.  
30
- 31  
32 14 17. Jerant A, Kravitz RL, Fernandez YGE, et al. Potential antidepressant overtreatment  
33 associated with office use of brief depression symptom measures. *J Am Board Fam Med*.  
34 2014;27(5):611-20.  
35 16
- 36  
37  
38 17 18. Mitchell AJ VA, Rao S. Clinical diagnosis of depression in primary care: a meta-analysis.  
39 *Lancet*. 2009;374:609–19.  
40 18
- 41  
42 19 19. Wong J MA, Egualé T, Buckeridge DL, Abrahamowicz M, Tamblyn R. Treatment  
43 Indications for Antidepressants Prescribed in Primary Care in Quebec, Canada, 2006-2015.  
44 *JAMA* 2016; 315(20):2230-1.  
45 21
- 46  
47  
48 22 20. Organisation for Economic Cooperation and Development (OECD). Health at a Glance 2015:  
49 How does Australia compare? Available at: [https://www.oecd.org/australia/Health-at-a-](https://www.oecd.org/australia/Health-at-a-Glance-2015-Key-Findings-AUSTRALIA.pdf)  
50 23 [Glance-2015-Key-Findings-AUSTRALIA.pdf](https://www.oecd.org/australia/Health-at-a-Glance-2015-Key-Findings-AUSTRALIA.pdf) Accessed January 16, 2017.  
51 24  
52  
53  
54  
55  
56  
57  
58  
59  
60

- 1  
2  
3 1 21. Elliott C. White Coat, Black Hat. Adventures on the Dark Side of Medicine. Boston, MA,  
4 USA: Beacon Press; 2010.  
5 2  
6  
7 3 22. Mintzes B. 'Ask your doctor'. Women and direct to consumer advertising. Chapter 2: 15-46.  
8 In: Ford AR and Sabil D (eds). The Push to Prescribe. Women & Canadian Drug Policy.  
9 Toronto: Women's Press. 2010.  
10 4  
11 5  
12  
13 6 23. QuintilesIMS. Quetiapine Fumarate unit sales in Australia, 2012 to 2015. *Data provided to*  
14 *authors on request by QuintilesIMS, November 2016.*  
15 7  
16  
17 8 24. Actavis takes back Actonel December 12, 2014. Available at:  
18 <https://pharmadispatch.com/news/actavis-takes-back-actonel> Accessed January 9, 2017.  
19 9  
20  
21  
22 10 25. Pharmaceutical Benefits Scheme. Australian Department of Health. ASM\_Table\_1.  
23 Australian Statistics on Medicine. 2012 to 2015. Available at:  
24 [https://www.pbs.gov.au/info/browse/statistics - Expenditure2016](https://www.pbs.gov.au/info/browse/statistics-Expenditure2016) Accessed January 25,  
25 11  
26 12  
27 12  
28 13  
29 13 2017.  
30  
31 14 26. Prescrire Editorial Staff. Pour mieux soigner, des médicaments à écarter : bilan 2015. La  
32 Revue Prescrire. 2015;35(376):144-51.  
33 15  
34  
35 16 27. Anonymous. Agomelatine (Valdoxan). Worse than first-line antidepressants, up to 15-fold  
36 more expensive, and a worrying hepatic safety profile. Drug Assessment Report Drug and  
37 Therapeutics Bulletin of Navarre. DAR no. 3. 2010. Available at:  
38 [http://www.navarra.es/home\\_en/Temas/Portal+de+la+Salud/Profesionales/Documentacion+y](http://www.navarra.es/home_en/Temas/Portal+de+la+Salud/Profesionales/Documentacion+y+publicaciones/Publicaciones+tematicas/Medicamento/FET/2010/DAR+No+3+Agomelatine+publicaciones/Publicaciones+tematicas/Medicamento/FET/2010/DAR+No+3+Agomelatine)  
39 18  
40 19  
41 [+publicaciones/Publicaciones+tematicas/Medicamento/FET/2010/DAR+No+3+Agomelatine](http://www.navarra.es/home_en/Temas/Portal+de+la+Salud/Profesionales/Documentacion+y+publicaciones/Publicaciones+tematicas/Medicamento/FET/2010/DAR+No+3+Agomelatine)  
42 20  
43 [.htm](http://www.navarra.es/home_en/Temas/Portal+de+la+Salud/Profesionales/Documentacion+y+publicaciones/Publicaciones+tematicas/Medicamento/FET/2010/DAR+No+3+Agomelatine) Accessed January 25, 2017.  
44 21  
45  
46 22 28. Komossa K, Depping, AM, Gaudchau A et al. Second-generation antipsychotics for major  
47 depressive disorder and dysthymia. . Cochrane Database of Systematic Reviews. 2010;12.  
48 23  
49  
50 24 29. Therapeutics Initiative. Antipsychotics should not be used for non-psychotic depression.  
51 Therapeutics Letter 95. September 30, 2015. Available at:  
52 [http://www.ti.ubc.ca/2015/09/30/antipsychotics-should-not-be-used-for-non-psychotic-](http://www.ti.ubc.ca/2015/09/30/antipsychotics-should-not-be-used-for-non-psychotic-depression/)  
53 25  
54 26  
55 [depression/](http://www.ti.ubc.ca/2015/09/30/antipsychotics-should-not-be-used-for-non-psychotic-depression/) Accessed January 16, 2017.  
56 27  
57  
58  
59  
60

- 1  
2  
3 1 30. Prescrire Editorial Staff. Towards better patient care: drugs to avoid in 2016. Prescrire  
4 2 International. 2016;25(170):105-11.  
5  
6  
7  
8 3 31. McColl G. Chair, Drug Utilisation Sub Committee. Drug Utilisation Committee Outcome  
9 4 Statement 29-30 September 2016. Canberra, Australia. Pharmaceutical Benefits Advisory  
10 5 Committee, Pharmaceutical Benefits Service. 2016. Available at:  
11 6 <http://www.pbs.gov.au/industry/listing/elements/dusc-meetings/dos/dusc-dos-sep-2016.pdf>  
12 7 Accessed January 16, 2017.  
13  
14  
15  
16  
17 8 32. Therapeutics Initiative. Are claims for newer overactive bladder drugs warranted?  
18 9 Therapeutics Letter 93, April 22, 2015. Available at: <http://www.ti.ubc.ca/2015/04/22/are-claims-for-newer-drugs-for-overactive-bladder-warranted/>  
19 10 Accessed January 26, 2017.  
20  
21  
22  
23 11 33. Medicines and Health Products Regulatory Agency, UK. Mirabegron (Betmiga ▼): risk of  
24 12 severe hypertension and associated cerebrovascular and cardiac events. Drug Safety Update.  
25 13 14 October, 2015. Available at: <https://www.gov.uk/drug-safety-update/mirabegron-betmiga-risk-of-severe-hypertension-and-associated-cerebrovascular-and-cardiac-events>  
26 14 Accessed  
27 15 January 20, 2017.  
28  
29  
30  
31  
32  
33 16 34. Gagnon MA, Lexchin J (2008) The cost of pushing pills: A new estimate of pharmaceutical  
34 17 promotion expenditures in the united states. PLoS Med 5(1): e1.  
35 18 doi:10.1371/journal.pmed.0050001  
36  
37  
38  
39 19 35. Brody H, Light DW. The Inverse Benefit Law: How Drug Marketing Undermines Patient  
40 20 Safety and Public Health. American Journal of Public Health. 2011;101(3):399-404.  
41  
42  
43  
44 21 36. Dana J, Loewenstein G. A Social Science Perspective on Gifts to Physicians From Industry.  
45 22 JAMA. 2003;290(2):252-5.  
46  
47  
48 23 37. DeJong C, Aguilar T, Tseng C, Lin GA, Boscardin W, Dudley R. Pharmaceutical industry–  
49 24 sponsored meals and physician prescribing patterns for medicare beneficiaries. JAMA  
50 25 Internal Medicine. 2016;176(8):1114-10.  
51  
52  
53  
54  
55  
56  
57  
58  
59  
60

- 1  
2  
3 1 38. Steinman MA, Bero LA, Chren M, Landefeld C. Narrative review: The promotion of  
4  
5 2 gabapentin: an analysis of internal industry documents. *Ann Intern Med.* 2006;145(4):284-  
6  
7 3 93.  
8  
9  
10 4  
11  
12  
13  
14  
15  
16  
17  
18  
19  
20  
21  
22  
23  
24  
25  
26  
27  
28  
29  
30  
31  
32  
33  
34  
35  
36  
37  
38  
39  
40  
41  
42  
43  
44  
45  
46  
47  
48  
49  
50  
51  
52  
53  
54  
55  
56  
57  
58  
59  
60

For peer review only

1 **Table 1: Characteristics of sponsored events for the three conditions**

|                                                           | <b>Total events<br/>n=116,845</b> | <b>Depression<br/>n=1,567</b> | <b>Osteoporosis<br/>n=1,375</b> | <b>Overactive<br/>bladder<br/>n=190</b> |
|-----------------------------------------------------------|-----------------------------------|-------------------------------|---------------------------------|-----------------------------------------|
| <b>Attendees</b>                                          |                                   |                               |                                 |                                         |
| Total number of attendees (% of total)                    | 3,481,750                         | 41,472 (1.2%)                 | 33,916 (1.0%)                   | 21,270 (0.6%)                           |
| Median/ event (IQR)                                       | 18 (12-25)                        | 19 (12-28)                    | 19 (12-27)                      | 20 (13-34)                              |
| <b>Clinicians present (% of events)</b>                   |                                   |                               |                                 |                                         |
| Medical specialists                                       | 80,060 (68.5%)                    | 839 (53.5%)                   | 921 (67.0%)                     | 50 (26.3%)                              |
| Primary care doctors                                      | 24,662 (21.1%)                    | 1,159 (74.0%)                 | 638 (46.4%)                     | 132 (69.5%)                             |
| Trainees                                                  | 44,774 (38.3%)                    | 222 (14.2%)                   | 531 (38.6%)                     | 18 (9.5%)                               |
| Nurses                                                    | 46,214 (39.6%)                    | 357 (22.8%)                   | 359 (26.1%)                     | 46 (24.2%)                              |
| <b>Types of medical specialists present (% of events)</b> |                                   |                               |                                 |                                         |
| <i>Most frequent</i>                                      | Oncology<br>19,723 (16.9%)        | Psychiatry<br>804 (51.3%)     | Endocrinology 516<br>(37.5%)    | Urology<br>30 (15.9%)                   |
| <i>Second</i>                                             | Surgery<br>10,670 (9.1%)          | Geriatrics<br>55 (3.5%)       | Rheumatology 190<br>(13.8%)     | Ob/Gyn<br>13 (6.8%)                     |
| <b>Expenses (AUD\$)</b>                                   |                                   |                               |                                 |                                         |
| Total cost of events                                      | \$286,117,928                     | \$6,259,581(2.2%)             | \$6,073,333(2.1%)               | \$568,332 (0.2%)                        |
| Median cost per event (IQR)                               | \$263<br>(\$153-1,195)            | \$1,941<br>(\$659–3,264)      | \$686<br>(\$217-2,500)          | \$2,012<br>(\$765-3,370)                |
| Median cost per head (IQR)                                | \$14 (\$10-68)                    | \$104 (\$48-141)              | \$52 (\$13-119)                 | \$85 (\$31-90)                          |
| Food & drink cost (% of total cost)                       | \$84,862,791<br>(30%)             | \$2,441,950 (39%)             | \$2,314,319<br>(38%)            | \$233,548<br>(41%)                      |
| Median per event food & drug cost (IQR)                   | \$197<br>(\$107-405)              | \$911<br>(\$135– 1,712)       | \$337 (\$150 -<br>1,478)        | \$1,115<br>(\$91-1868)                  |
| Median per head food & drink cost (IQR)                   | \$12 (\$8-20)                     | \$57 (\$11-77)                | \$17 (\$11-75)                  | \$55 (\$11-80)                          |
| <b>Event characteristics</b>                              |                                   |                               |                                 |                                         |
| Clinical setting                                          | 74,998 (64.2%)                    | 487 (31.1%)                   | 692 (50.3%)                     | 44 (23.2%)                              |
| Any food provided                                         | 105,667(90.4%)                    | 1441 (92.0%)                  | 1298 (94.4%)                    | 158 (83.2%)                             |
| Dinner                                                    | 19,873 (17.0%)                    | 811 (51.7%)                   | 512 (37.2%)                     | 41 (21.6%)                              |
| Lunch                                                     | 25,935 (22.2%)                    | 241 (15.4%)                   | 485 (35.3%)                     | 28 (14.7%)                              |
| Tea                                                       | 14,067 (12.0%)                    | 15 (1.0%)                     | 69 (5.0%)                       | 2 (1.1%)                                |
| Breakfast                                                 | 12,806 (11.0%)                    | 24 (1.5%)                     | 77 (5.6%)                       | 7 (3.7%)                                |
| All-day event meals                                       | 3,113 (2.7%)                      | 62 (4.0%)                     | 58 (4.2%)                       | 1 (0.5%)                                |
| Unspecified                                               | 29,873 (25.6%)                    | 288 (18.4%)                   | 97 (7.1%)                       | 79 (41.6%)                              |

2 *Abbreviations:* IQR = interquartile range

3

4

5

6

7

8

1 **Table 2: Pharmaceutical Benefits Scheme (PBS) subsidy of drugs marketed for depression,**  
 2 **osteoporosis, and overactive bladder marketed by sponsoring companies**

| Company             | Drug for condition (brand)                                                                     | PBS subsidy?(Y/N)                                                | PBAC decisions and rationale for restrictions                                                                                                                                                                                                                                                               | Notes                                                                                                   |
|---------------------|------------------------------------------------------------------------------------------------|------------------------------------------------------------------|-------------------------------------------------------------------------------------------------------------------------------------------------------------------------------------------------------------------------------------------------------------------------------------------------------------|---------------------------------------------------------------------------------------------------------|
| <b>Depression</b>   |                                                                                                |                                                                  |                                                                                                                                                                                                                                                                                                             |                                                                                                         |
| Servier             | Agomelatine (Valdoxan)                                                                         | No                                                               | Nov 2010: uncertainty; inappropriate comparator<br>July 2011, March 2012: superior clinical effectiveness and safety over SSRIs not demonstrated                                                                                                                                                            |                                                                                                         |
| AstraZeneca         | Quetiapine (Seroquel XR) <sup>a</sup>                                                          | No for MDD, treatment-resistant depression or anxiety disorders. | Nov 2011: inadequate clinical evidence to support superiority.<br>July 2013: non-inferior comparative safety and effectiveness not established                                                                                                                                                              | Quetiapine is PBS-funded for schizophrenia; acute mania & bipolar disorder                              |
| Pfizer              | Desvenlafaxine (Pristiq)                                                                       | Yes                                                              | Nov 2008: <i>cost minimisation</i> <sup>b</sup> vs. venlafaxine; no evidence of therapeutic advantage.                                                                                                                                                                                                      |                                                                                                         |
|                     | Venlafaxine (Efexor-XR, Altven), Sertraline (Zoloft), Reboxetine (Edronax), Doxepin (Sinequan) | Yes                                                              | <i>General schedule</i> <sup>c</sup> listings, major depressive disorder.                                                                                                                                                                                                                                   |                                                                                                         |
| <b>Osteoporosis</b> |                                                                                                |                                                                  |                                                                                                                                                                                                                                                                                                             |                                                                                                         |
| Amgen and GSK       | Denosumab (Prolia)                                                                             | Yes                                                              | July 2010: <i>cost-minimisation</i> <sup>b</sup> vs. zoledronic acid<br>Nov 2011: <i>Streamlined Authority</i> <sup>d</sup> , post-menopausal osteoporosis, age 70+, BMD T-score ≤ -2.5; cost-minimisation vs. alendronate<br>July 2013: superiority vs. zoledronic acid rejected; non-inferiority accepted | 2009: co-commercialised by Amgen and GSK; Dec 2015: Amgen reacquires all marketing rights in Australia. |
| Novartis            | Zoledronic acid (Aclasta)                                                                      | Yes                                                              | July 2008: <i>Authority Required</i> <sup>e</sup> cost-minimisation vs. alendronate; Nov 2008: listing extended: women aged 70+; BMD T-score ≤ -3.0<br>Nov 2009: extended to men<br>July 2011: 3-year limit removed; listing changed to <i>Streamlined Authority</i>                                        |                                                                                                         |
|                     | Oestradiol/norethisterone (Estalis continuous)                                                 | Yes                                                              | <i>General Schedule</i> <sup>c</sup>                                                                                                                                                                                                                                                                        |                                                                                                         |
| Servier             | Strontium (Protos)                                                                             | No (previously subsidised)                                       | July 2015: restricted to severe established osteoporosis,                                                                                                                                                                                                                                                   |                                                                                                         |

| Company                   | Drug for condition (brand)                                                  | PBS subsidy?(Y/N) | PBAC decisions and rationale for restrictions                                                                                                                                                                                                | Notes                                                                               |
|---------------------------|-----------------------------------------------------------------------------|-------------------|----------------------------------------------------------------------------------------------------------------------------------------------------------------------------------------------------------------------------------------------|-------------------------------------------------------------------------------------|
|                           |                                                                             |                   | patients unable to use other drugs, without cardiovascular contraindications<br>Aug 2016: delisted due to cardiac risks                                                                                                                      |                                                                                     |
| Sanofi                    | Risedronic acid (Actonel, Actonel Ec, Actonel Ec Combi, Actonel Ec Combi D) | Yes               | Feb 2001: postmenopausal osteoporosis; minimal fracture trauma; <i>cost-minimisation</i> vs. alendronate<br>Dec 2001 - extended to corticosteroid-induced osteoporosis<br>March 2013: extended to patients aged 70 + BMD T-score $\leq -2.5$ | Dec 2014: Sanofi transfers marketing rights to Actavis                              |
| <b>Overactive bladder</b> |                                                                             |                   |                                                                                                                                                                                                                                              |                                                                                     |
| Astellas                  | Mirabegron (Betmiga)                                                        | No                | N/A. No request made for PBS listing                                                                                                                                                                                                         |                                                                                     |
| CSL and Astellas          | Solifenacin (Vesicare)                                                      | No                | July 2007: uncertain clinical benefit and cost-effectiveness                                                                                                                                                                                 | Feb 2011 – Oct 2014: marketed by CSL<br>Oct 2014: Astellas regains marketing rights |

- a. Immediate release quetiapine products are not indicated for major depressive disorder (MDD) or general anxiety disorder, only Seroquel XR.
- b. *Cost-minimisation*: product is considered non-inferior in safety and efficacy to listed comparator; no higher pricing allowed.
- c. *General Schedule*: no prior authority required.
- d. *Streamlined Authority*: no prior approval required, but a streamlined authority code is required on the prescription; if quantities and/or repeats exceed specified levels, treated as *Authority Required*.
- e. *Authority Required*: telephone or written approval required from Department of Health prior to prescribing.

**Abbreviations:** BMD = bone mineral density; GSK= GlaxoSmithKline; MDD = major depressive disorder; PBAC = Pharmaceutical Benefits Advisory Committee; PBS = Pharmaceutical Benefits Scheme



1  
2  
3  
4  
5  
6  
7  
8  
9  
10  
11  
12  
13  
14  
15  
16  
17  
18  
19  
20  
21  
22  
23  
24  
25  
26  
27  
28  
29  
30  
31  
32  
33  
34  
35  
36  
37  
38  
39  
40  
41  
42  
43  
44  
45  
46  
47  
48  
49  
50  
51  
52  
53  
54  
55  
56  
57  
58  
59  
60

1  
2

**Table 3: Illustrative examples of verbatim descriptions of sponsored events**

| Sponsor     | Date  | Event content                                                                                                                                                                                                                             | Venue                                                  | Professionals Present                                                  | Hospitality                                                                    | Total Cost  |
|-------------|-------|-------------------------------------------------------------------------------------------------------------------------------------------------------------------------------------------------------------------------------------------|--------------------------------------------------------|------------------------------------------------------------------------|--------------------------------------------------------------------------------|-------------|
| Servier     | 05/12 | 120 minute presentation including a discussion on Valdoxan specific patient cases                                                                                                                                                         | The Sebel Resort, Windsor, NSW                         | 26 Advanced Trainees, Hospital Pharmacists, Psychiatrists              | Dinner, including alcoholic and non-alcoholic beverages                        | \$4138.84   |
| Astrazeneca | 08/14 | Educational dinner meeting for General Practitioners with a specialist presentation on The Anxious Depressed Patient. 1 hour educational content                                                                                          | Kimberly Gardens St Kilda East VIC                     | 35 GPs, Psychiatrists                                                  | Dinner with alcoholic and non alcoholic beverages                              | \$3,750.00  |
| GSK         | 06/15 | HCP Osteoporosis presentation. Providing HCPs with the confidence to switch appropriate patients from bis-phosphonates to Prolia. GSK was not responsible for organising the educational content. Duration of Educational Content: 2 hour | GG Restaurant, 105 Yarra St, Geelong VIC 3220          | 38 GPs, Endocrinologists                                               | Three Course Dinner, Juice / Water, Non Alcoholic Beverage, Alcoholic Beverage | \$4,136.5   |
| Astellas    | 04/14 | Educational Dinner Meeting. Prof Philip Van Kerrebroeck giving educational launch presentation on BETMIGA, the new oral treatment in the management of Over Active Bladder. One hour educational content.                                 | The Terrace Room (Private Dining), L'Aqua, Sydney, NSW | 10 leading specialists with an interest in OAB - especially Urologists | Food & Beverages                                                               | \$11,742.95 |

1  
2  
3  
4  
5  
6  
7  
8  
9  
10  
11  
12  
13  
14  
15  
16  
17  
18  
19  
20  
21  
22  
23  
24  
25  
26  
27  
28  
29  
30  
31  
32  
33  
34  
35  
36  
37  
38  
39  
40  
41  
42  
43  
44  
45  
46  
47  
48  
49  
50  
51  
52  
53  
54  
55  
56  
57  
58  
59  
60

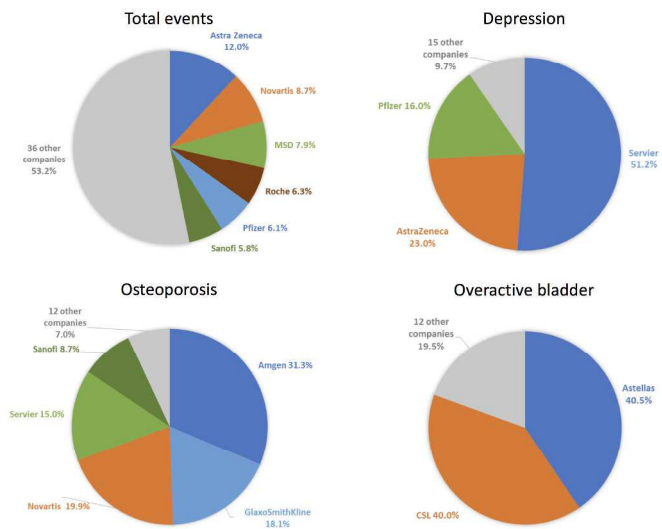

Figure 1: Percent of events sponsored by each company, in total and per condition (companies sponsoring  $\geq 5\%$  of events listed individually)

279x215mm (300 x 300 DPI)

view only

1  
2  
3  
4  
5  
6  
7  
8  
9  
10  
11  
12  
13  
14  
15  
16  
17  
18  
19  
20  
21  
22  
23  
24  
25  
26  
27  
28  
29  
30  
31  
32  
33  
34  
35  
36  
37  
38  
39  
40  
41  
42  
43  
44  
45  
46  
47  
48  
49  
50  
51  
52  
53  
54  
55  
56  
57  
58  
59  
60

**The Anxious,  
Depressed Patient**

Dr Ian Katz,  
Consultant Psychiatrist,  
Monash Hospital

**Wednesday 6<sup>th</sup> August 2014**  
6.45pm – 9.30pm

**Kimberly Gardens**  
441 Inkerman Street,  
St Kilda East

For more information, please contact one  
of your AstraZeneca representatives:  
Emily Armstrong on 0410 589 102  
Brian Kent on 0434 327 898

Your personal information ("Information") will be collected and used by AstraZeneca Pty Ltd ("AstraZeneca") and Australian CoCo Pty Ltd (to co-vent "Co-vent") to register you for this event, for follow-up purposes and for any other purpose described in AstraZeneca's Privacy Policy or Co-vent's Privacy Policy (see below for link). AstraZeneca and Co-vent may collect your information from third parties such as travel agents to organise travel arrangements for an event and from each other. AstraZeneca and Co-vent may disclose your information to one another, their related entities or to their service providers (including IT support/service providers). Some of these related entities and service providers may be located overseas including in the US, European Union and Asia Pacific. If you do not reside in or relocate to Australia, AstraZeneca and Co-vent will not be able to register you for this event. Please refer to our Privacy Policies at [http://www.astrazeneca.com.au/privacy\\_policy](http://www.astrazeneca.com.au/privacy_policy) and <http://www.covent.com/privacy-statement> for more information about how your information is handled and how you may opt to access or correct your information, or subject your privacy complaint. AstraZeneca's address is Alma Road, North Ryde, NSW, 2113 and Co-vent's address is Level 5, 33 Berry Street, North Sydney, NSW, 2060.

AstraZeneca Pty Ltd, Alma Road, North Ryde 2113  
ABN 54 009 882 311

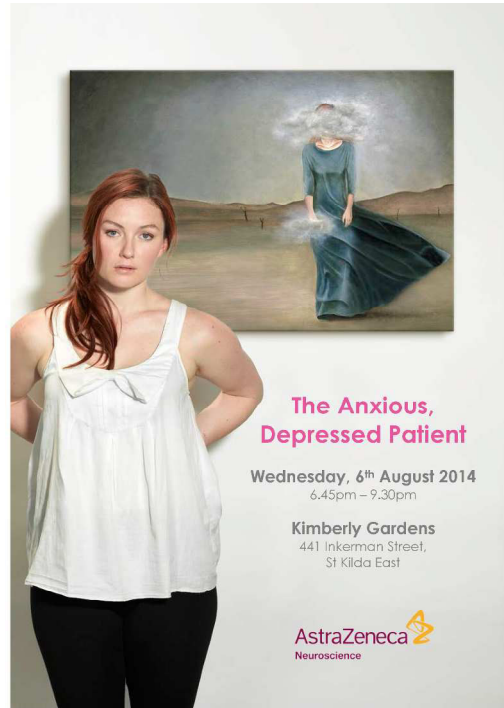

Figure 2: Invitation for an AstraZeneca sponsored event

Available at : <http://ajmf.org.au/wp-content/uploads/2014/07/AJMF-VIC-Aug-2014-meeting-Kimberly-Gardens2.pdf>. Accessed October 25, 2017. An advertisement with the same image ran in the May 20, 2013 issue of the Medical Journal of Australia.

297x210mm (300 x 300 DPI)

only

1  
2  
3 **On-line Appendix:**  
4

5  
6 **Mintzes et al. Does industry-sponsored education foster overdiagnosis and overtreatment of**  
7 **depression, osteoporosis and overactive bladder syndrome? An Australian cohort study**  
8  
9

10 **Appendix Table 1:**  
11 **Coding of event characteristic and audience variables**  
12

| Variable name                | Keyword search                                                                                                                                                                                                                                                                                                                                                                                                                                                                                                                                                                                                                                                                                                                                                                                                                                                                                                                                                                                                                                                                                                                                                                                                                                                                                                                |
|------------------------------|-------------------------------------------------------------------------------------------------------------------------------------------------------------------------------------------------------------------------------------------------------------------------------------------------------------------------------------------------------------------------------------------------------------------------------------------------------------------------------------------------------------------------------------------------------------------------------------------------------------------------------------------------------------------------------------------------------------------------------------------------------------------------------------------------------------------------------------------------------------------------------------------------------------------------------------------------------------------------------------------------------------------------------------------------------------------------------------------------------------------------------------------------------------------------------------------------------------------------------------------------------------------------------------------------------------------------------|
| COMPANY                      | A. Menarini Australia Pty Ltd; Abbott Australasia Pty Ltd OR AbbVie Pty Ltd; Actelion Pharmaceuticals Australia Pty Ltd; Alexion Pharmaceuticals Australasia PTY LTD; Allergan Australia Pty Ltd; Amgen Australia; Astellas Pharma Australia Pty Ltd; Astrazeneca Pty Ltd; Baxter Healthcare Pty Ltd; Bayer Australia Ltd; Besins Healthcare Australia; BioCeuticals; Biogen Idec Australia Pty Limited; Boehringer Ingelheim Pty Limited; Bristol-Myers Squibb Australia Pty Limited; Celgene Pty Ltd; CSL (includes also bioCSL Australia Pty Ltd and CSL Behring); Eisai Australia Pty Ltd; Eli Lilly Australia Pty Ltd; Fresenius Kabi Australia; Gilead Sciences Pty.; GlaxoSmithKline Australia Pty Ltd *+ (GSK); iNova Pharmaceuticals (Aus) Pty Ltd; IPSEN Pty Ltd; Janssen; LEO Pharma Pty Ltd; Lundbeck Australia; Merck Serono Australia Pty Ltd; MSD Australia Pty Ltd; Mundipharma Pty Ltd; Mylan EPD; Norgine Pty Limited; Novartis Pharmaceuticals Australia Pty Limited (includes also Alcon Laboratories); Novo Nordisk Pharmaceuticals; Pfizer Australia; Roche Products Pty Limited; Sanofi/Sanofi Aventis Australia Pty Ltd; Servier Laboratories (Australia) Pty Ltd; Shire Australia; Takeda Pharmaceuticals Australia Pty Ltd (includes also Nycomed Pty Ltd Report); UCB Pharma; Vifor Pharma Pty Ltd |
| LOCATION                     |                                                                                                                                                                                                                                                                                                                                                                                                                                                                                                                                                                                                                                                                                                                                                                                                                                                                                                                                                                                                                                                                                                                                                                                                                                                                                                                               |
| New South Wales              | NSW, New South Wales, Sydney, other cities or suburbs, and postal codes of NSW*                                                                                                                                                                                                                                                                                                                                                                                                                                                                                                                                                                                                                                                                                                                                                                                                                                                                                                                                                                                                                                                                                                                                                                                                                                               |
| Victoria                     | VIC, Victoria, Melbourne, other cities or suburbs and postal codes of VIC*                                                                                                                                                                                                                                                                                                                                                                                                                                                                                                                                                                                                                                                                                                                                                                                                                                                                                                                                                                                                                                                                                                                                                                                                                                                    |
| Australian Capital Territory | ACT, Australian Capital Territory, Canberra, other cities or suburbs, and postal codes of ACT*                                                                                                                                                                                                                                                                                                                                                                                                                                                                                                                                                                                                                                                                                                                                                                                                                                                                                                                                                                                                                                                                                                                                                                                                                                |
| Western Australia            | WA, Western Australia, Perth, other cities or suburbs, and postal codes of WA*                                                                                                                                                                                                                                                                                                                                                                                                                                                                                                                                                                                                                                                                                                                                                                                                                                                                                                                                                                                                                                                                                                                                                                                                                                                |

| Variable name                                                                                                                                                                                                                                                                                                                                                        | Keyword search                                                                                                                                                                                                                                                                                                                                                                                |
|----------------------------------------------------------------------------------------------------------------------------------------------------------------------------------------------------------------------------------------------------------------------------------------------------------------------------------------------------------------------|-----------------------------------------------------------------------------------------------------------------------------------------------------------------------------------------------------------------------------------------------------------------------------------------------------------------------------------------------------------------------------------------------|
| South Australia                                                                                                                                                                                                                                                                                                                                                      | SA, South Australia, Adelaide, other cities or suburbs, and postal codes of SA*                                                                                                                                                                                                                                                                                                               |
| Northern Territory                                                                                                                                                                                                                                                                                                                                                   | NT, North Territory, other cities or suburbs, and postal codes of NT*                                                                                                                                                                                                                                                                                                                         |
| Tasmania                                                                                                                                                                                                                                                                                                                                                             | TAS, Tasmania, Hobart, other cities or suburbs, and postal codes of Tasmania*                                                                                                                                                                                                                                                                                                                 |
| Overseas                                                                                                                                                                                                                                                                                                                                                             | Overseas: outside of Australia**                                                                                                                                                                                                                                                                                                                                                              |
| *Where the state or capital was not listed, events were hand coded based on postal codes, cities or suburbs                                                                                                                                                                                                                                                          |                                                                                                                                                                                                                                                                                                                                                                                               |
| **Events not taking place in an Australian state were hand-coded                                                                                                                                                                                                                                                                                                     |                                                                                                                                                                                                                                                                                                                                                                                               |
| <b>MEALS</b>                                                                                                                                                                                                                                                                                                                                                         |                                                                                                                                                                                                                                                                                                                                                                                               |
| • Lunch                                                                                                                                                                                                                                                                                                                                                              | Lunch                                                                                                                                                                                                                                                                                                                                                                                         |
| • Dinner                                                                                                                                                                                                                                                                                                                                                             | Dinner                                                                                                                                                                                                                                                                                                                                                                                        |
| • Breakfast                                                                                                                                                                                                                                                                                                                                                          | Breakfast                                                                                                                                                                                                                                                                                                                                                                                     |
| • Tea                                                                                                                                                                                                                                                                                                                                                                | Afternoon tea, morning tea, light refreshments, light meals, sandwiches & drinks, coffee cart, snack and beverage, sushi                                                                                                                                                                                                                                                                      |
| • All day events w/ meals                                                                                                                                                                                                                                                                                                                                            | Day delegate package*; conference package**                                                                                                                                                                                                                                                                                                                                                   |
| • Food unspecified                                                                                                                                                                                                                                                                                                                                                   | food & beverages, meals, drinks, in hospital catering, beverages, wine                                                                                                                                                                                                                                                                                                                        |
| • No meals provided                                                                                                                                                                                                                                                                                                                                                  | Sponsorship/accommodation only, no hospitality provided, travel/accommodation only (domestic events)                                                                                                                                                                                                                                                                                          |
| *Note: "day delegate package" consisted of entries where multiple meals were listed ((Lunch, tea), (Breakfast, tea), (Dinner, tea), (Breakfast, lunch, tea))                                                                                                                                                                                                         |                                                                                                                                                                                                                                                                                                                                                                                               |
| **Note: "conference package" consisted of events lasting multiple days and typically included a day delegate package, often accommodation (food and beverage not reported separately), registration (food and beverage not reported separately), or travel (including flights, registration, airfares, accommodation and food and beverages not reported separately) |                                                                                                                                                                                                                                                                                                                                                                                               |
| <b>EVENTS HELD IN CLINICAL SETTING</b>                                                                                                                                                                                                                                                                                                                               | Hospital; clinic; practice; medicare local; health centre; surgery; medical centre; medical; health care centre; specialist centre; cancer centre; cancer care centre; heart centre; medical and dental centre; endocrine centre; radiotherapy centre; radiation centre; optical centre; eye centre; renal unit; ward; department; dept; community health; family planning; education centre. |
| <b>PROFESSIONAL STATUS</b>                                                                                                                                                                                                                                                                                                                                           |                                                                                                                                                                                                                                                                                                                                                                                               |
| • Primary care doctors                                                                                                                                                                                                                                                                                                                                               | GP; general practitioner; family medicine.                                                                                                                                                                                                                                                                                                                                                    |

| Variable name         | Keyword search                                                                                                                                                                                                                                                                                                                                                                                                                                                                                                                                                                                                                                                                                                                                                                                                                                                                                                                                                                                                                                                                                                                                                                                                                 |
|-----------------------|--------------------------------------------------------------------------------------------------------------------------------------------------------------------------------------------------------------------------------------------------------------------------------------------------------------------------------------------------------------------------------------------------------------------------------------------------------------------------------------------------------------------------------------------------------------------------------------------------------------------------------------------------------------------------------------------------------------------------------------------------------------------------------------------------------------------------------------------------------------------------------------------------------------------------------------------------------------------------------------------------------------------------------------------------------------------------------------------------------------------------------------------------------------------------------------------------------------------------------|
| • Nurses              | Nurse                                                                                                                                                                                                                                                                                                                                                                                                                                                                                                                                                                                                                                                                                                                                                                                                                                                                                                                                                                                                                                                                                                                                                                                                                          |
| • Pharmacists         | Pharmacist                                                                                                                                                                                                                                                                                                                                                                                                                                                                                                                                                                                                                                                                                                                                                                                                                                                                                                                                                                                                                                                                                                                                                                                                                     |
| • Trainees            | Registrar; resident; intern; student; advanced trainee; RMO; resident medical officer; JHO; SHO; senior house officer; PHO; principal house officer; fellow                                                                                                                                                                                                                                                                                                                                                                                                                                                                                                                                                                                                                                                                                                                                                                                                                                                                                                                                                                                                                                                                    |
| • Specialty care      | Specialist; consultant; senior medical officer; SMO; visiting medical officer; VMO; general medicine; general physician; *ology physician; *ology doctor; allergist; allergy physician; anesthesiologist; anesthetist; anaesthesiologist; anaesthetist; andrologist; cardiologist; dermatologist, diabetologist; emergency physician; emergency medicine physician; endocrinologist; epileptologist; gastroenterologist; geriatrician; getriatric physician; gynaecologist; obstetrician; OB/GYN; haematologist; hematologist; hepatologist; immunologist; infectious disease physician; infectious disease doctor; internal medicine physician; microbiologist; neonatologist; neurologist; nuclear medicine physician; nephrologist; renal physician; renal doctor; urologist; oncologist; pharmacologist; pulmonologist; psychogeriatrician; ophthalmologist; rheumatologist; radiologist; respiratory physician; respiratory medicine physician; respiratory medicine doctor; palliative care physician; pathologist; sexual health physician; sexual health doctor; psychiatrist; psychiatry doctor; paediatrician; surgeon; surgery doctor; intensive care doctor; intensivist; intensive care physician; cardiothoracic |
| <b>CLINICAL FOCUS</b> |                                                                                                                                                                                                                                                                                                                                                                                                                                                                                                                                                                                                                                                                                                                                                                                                                                                                                                                                                                                                                                                                                                                                                                                                                                |
| • Allergy/Immunology  | Allergist; allergy; immunologist; immunology                                                                                                                                                                                                                                                                                                                                                                                                                                                                                                                                                                                                                                                                                                                                                                                                                                                                                                                                                                                                                                                                                                                                                                                   |
| • Anaesthesiology     | Anesthesiologist; anesthetist; anaesthesiologist; anaesthetist; anaesthesiology                                                                                                                                                                                                                                                                                                                                                                                                                                                                                                                                                                                                                                                                                                                                                                                                                                                                                                                                                                                                                                                                                                                                                |
| • Andrology           | Andrologist                                                                                                                                                                                                                                                                                                                                                                                                                                                                                                                                                                                                                                                                                                                                                                                                                                                                                                                                                                                                                                                                                                                                                                                                                    |
| • Cardiology          | Cardiologist; cardiology                                                                                                                                                                                                                                                                                                                                                                                                                                                                                                                                                                                                                                                                                                                                                                                                                                                                                                                                                                                                                                                                                                                                                                                                       |
| • Dermatology         | Dermatologist; dermatology                                                                                                                                                                                                                                                                                                                                                                                                                                                                                                                                                                                                                                                                                                                                                                                                                                                                                                                                                                                                                                                                                                                                                                                                     |
| • Emergency           | Emergency                                                                                                                                                                                                                                                                                                                                                                                                                                                                                                                                                                                                                                                                                                                                                                                                                                                                                                                                                                                                                                                                                                                                                                                                                      |
| • Endocrinology       | endocrinologist; endocrinology; diabetologist; diabetology; diabetes                                                                                                                                                                                                                                                                                                                                                                                                                                                                                                                                                                                                                                                                                                                                                                                                                                                                                                                                                                                                                                                                                                                                                           |
| • Gastroenterology    | Gastroenterologist; gastroenterology; Hepatologist; hepatology                                                                                                                                                                                                                                                                                                                                                                                                                                                                                                                                                                                                                                                                                                                                                                                                                                                                                                                                                                                                                                                                                                                                                                 |
| • Geriatrics          | Geriatrician; geriatric; psychogeriatrician; elderly                                                                                                                                                                                                                                                                                                                                                                                                                                                                                                                                                                                                                                                                                                                                                                                                                                                                                                                                                                                                                                                                                                                                                                           |
| • Haematology         | Haematologist; haematology; hematology; hematologist                                                                                                                                                                                                                                                                                                                                                                                                                                                                                                                                                                                                                                                                                                                                                                                                                                                                                                                                                                                                                                                                                                                                                                           |

| Variable name                                                                                                | Keyword search                                                                                                                    |
|--------------------------------------------------------------------------------------------------------------|-----------------------------------------------------------------------------------------------------------------------------------|
| • Infectious Diseases                                                                                        | Infectious disease; microbiologist; microbiology                                                                                  |
| • Internal Medicine                                                                                          | Internal medicine                                                                                                                 |
| • Intensive care                                                                                             | Intensive care; intensivist; critical care                                                                                        |
| • Neonatology                                                                                                | Neonatologist; neonatology; NICU; neonatal                                                                                        |
| • Nuclear medicine                                                                                           | Nuclear medicine                                                                                                                  |
| • Nephrology                                                                                                 | Nephrologist, nephrology; renal; kidney                                                                                           |
| • Neurology                                                                                                  | Neurologist; neurology; epileptologist                                                                                            |
| • Obstetrics/Gynaecology                                                                                     | Gynaecologist; gynaecology; obstetrician; OB/GYN; obstetrics                                                                      |
| • Oncology                                                                                                   | Oncologist; oncology; cancer                                                                                                      |
| • Ophthalmology                                                                                              | Ophthalmologist; ophthalmology                                                                                                    |
| • Otolaryngology                                                                                             | Otolaryngology                                                                                                                    |
| • Palliative care                                                                                            | Palliative care                                                                                                                   |
| • Pathology                                                                                                  | Pathologist; pathology                                                                                                            |
| • Pharmacology                                                                                               | Pharmacologist; pharmacology                                                                                                      |
| • Paediatrics                                                                                                | Paediatrician; paediatric*; pediatric*                                                                                            |
| • Psychiatry                                                                                                 | Psychiatrist; psychiatry; mental health                                                                                           |
| • Radiology                                                                                                  | Radiologist; radiology                                                                                                            |
| • Rheumatology                                                                                               | Rheumatologist; rheumatology                                                                                                      |
| • Respiratory medicine                                                                                       | Lung specialist; respiratory; pulmonologist                                                                                       |
| • Sexual health                                                                                              | Sexual health                                                                                                                     |
| • Surgery                                                                                                    | Surgeon; surgery; surgical; operating theatre                                                                                     |
| • Urology                                                                                                    | Urologist; urology                                                                                                                |
| *Note: clinical focus is a proxy variable based on clinical specialty of attendees and/or event description. |                                                                                                                                   |
| EVENT TYPE                                                                                                   |                                                                                                                                   |
| • Meeting (not otherwise specified)                                                                          | Search for generic word "meeting"                                                                                                 |
| • Journal club                                                                                               | Journal club; journalclub                                                                                                         |
| • Inservice                                                                                                  | Inservice                                                                                                                         |
| • Workshop                                                                                                   | Workshop                                                                                                                          |
| • Grand rounds                                                                                               | Grand round; grandround                                                                                                           |
| • Scientific meeting                                                                                         | scientific meeting; congress; conference AND NOT videoconference/teleconference                                                   |
| • Clinical meeting                                                                                           | internal meeting; departmental meeting; clinical meeting; case review, case conference; case study meeting; case study conference |
| • Multidisciplinary meeting                                                                                  | Multidisciplinary meeting                                                                                                         |

## Appendix Table 2:

## Coding of three included conditions

| Variable name      | Keyword search                                                                                                                                                                                                                                                                                                                                                                                                                                                                                                                                                                                   |
|--------------------|--------------------------------------------------------------------------------------------------------------------------------------------------------------------------------------------------------------------------------------------------------------------------------------------------------------------------------------------------------------------------------------------------------------------------------------------------------------------------------------------------------------------------------------------------------------------------------------------------|
| DEPRESSION         | Depress; Anx; Citalopram; Sertraline; Agomelatine; Vortioxetine; Amitriptyline; Clomipramine; Desvenlafaxine; Dothiepin; Doxepin; Duloxetine; Escitalopram; Fluoxetine; Fluvoxamine; Imipramine; Miaserin; Mirtazapine; Moclobemide; Paroxetine; Reboxetine; Tranylcypromine; Trimipramine; Venlafaxine; Brintellix; Valdoxan; Cymbalta; Anafranil; Pristiq; Sinequan; Andepira; Prozac; Tolvon; Avanza; Mirtazon; Remero; Edronax; Zoloft; Xydep; Altven; Efexor                                                                                                                                |
| OSTEOPOROSIS       | osteop; bone health; bone disease; metabolic bone disease; mineral bone disease; bone mineral; mineral bone; bone and calcium; fracture; Bisphosphonate; Denosumab; Zoledronic acid; Cinacalcet; Teriparatide; Alendronic acid; Alendronate; Cholecalciferol; Calcitriol; Calcium chloride; Disodium Pamidronate; Ibandronate; Raloxifene; Risedronate ; Salcatonin; Sodium Clodronate; Strontium ranelate; Tiludronate; Prolia; Forteo; Sensipar; Adronat; Fosamax; Dronalen; Rocaltrol; Risedronate; Aredia; Bondronat; Evifyne; Evista; Miacalcic; Protos; Skelid; Aclasta; Osteovan; Zometa. |
| OVERACTIVE BLADDER | Incontinence; Overactive AND bladder; Over active AND bladder; Betmiga; Darifenacin; Oxybutynin; Propantheline; Solifenacin; Tolterodine; Mirabegron; Ditropan; Vesicare; Detrusitol                                                                                                                                                                                                                                                                                                                                                                                                             |



Appendix Table 3:

## Top 5 sponsoring companies in total and per condition

| Company      | Number of events (% of category) | Number of attendees (% of category) | Total cost of food and beverage (\$AUD) | Total cost of functions (\$AUD) | Mean total cost per event (SD) (AUD\$) | Median total cost per event (IQR) (AUD\$) |
|--------------|----------------------------------|-------------------------------------|-----------------------------------------|---------------------------------|----------------------------------------|-------------------------------------------|
| General      | 116,845                          | 3,481,750                           | 84,862,791                              | 286,117,928                     | 2,449.70 (SD=15,020)                   | 263 (153-1,195)                           |
| AstraZeneca  | 13,968 (12.0%)                   | 435,686 (12.5%)                     | 12,725,027.09 (15.0%)                   | 31,766,776 (11.1%)              | 2,274 (SD=10,878)                      | 318 (165-2,261)                           |
| Novartis     | 10,120 (8.7%)                    | 244,069 (7.0%)                      | 6,600,502.76 (7.8%)                     | 27,467,246 (9.6%)               | 2,714 (SD=16,109)                      | 270 (167-1,154)                           |
| MSD          | 9,142 (7.8%)                     | 214,621 (6.2%)                      | 5,388,246.54 (6.4%)                     | 18,352,116 (6.4%)               | 2,007 (SD=9,274)                       | 341 (180-1,182)                           |
| Roche        | 7,383 (6.3%)                     | 174,878 (5.0%)                      | 2,891,426.00 (3.4%)                     | 16,625,126 (5.8%)               | 2,252 (SD=22,101)                      | 186 (129-284)                             |
| Pfizer       | 7,125 (6.1%)                     | 188,439 (5.4%)                      | 3,740,677.35 (4.4%)                     | 18,464,785 (6.5%)               | 2,591 (SD=21,482)                      | 236 (141-573)                             |
| Depression   | 1,567                            | 41,472                              | 2,441,950                               | 6,259,581                       | 3,995 (SD=15,895)                      | 1,941 (659 – 3,264)                       |
| Servier      | 803 (51.2%)                      | 19,671 (47.4%)                      | 1,497,510 (61.3%)                       | 3,757,665 (60.0%)               | 4,680 (SD=1,7837)                      | 2,164 (921 - 3,145)                       |
| AstraZeneca  | 361 (23.0%)                      | 9,577 (23.1%)                       | 551,985 (22.6%)                         | 1,269,764 (20.3%)               | 3,517 (SD =5,306)                      | 1,082 (126-2,045)                         |
| Pfizer       | 251 (16.0%)                      | 5,160 (12.4%)                       | 182,306 (7.5%)                          | 326,255 (5.2%)                  | 1,300 (SD=1,846)                       | 420 (195-1,978)                           |
| Eli Lilly    | 57 (3.6%)                        | 1,175 (2.8%)                        | 28,902 (1.2%)                           | 47,485 (0.8%)                   | 833 (SD=1,591)                         | 165 (75-950)                              |
| Janssen      | 33 (2.1%)                        | 974 (2.35%)                         | 5,760 (0.24%)                           | 56,953 (0.91%)                  | 1,726 (SD=5,788)                       | 187 (106-273)                             |
| Osteoporosis | 1,375                            | 33,916                              | 2,314,319                               | 6,073,333                       | 4,417 (SD=21,611)                      | 686 (217-2,500)                           |
| Amgen        | 431 (31.4%)                      | 10,120 (29.84%)                     | 943,254 (40.8%)                         | 2,114,304 (34.8%)               | 4,906 (SD=29,502)                      | 259 (175-630)                             |
| Novartis     | 274 (19.9%)                      | 5,735 (16.91%)                      | 308,064 (13.3%)                         | 971,212 (16.0%)                 | 3,545 (SD=16,701)                      | 369 (159-2,011)                           |
| GSK          | 249 (18.1%)                      | 5,273 (15.55%)                      | 474,364 (20.5%)                         | 928,803 (15.3%)                 | 3,730 (SD=11,982)                      | 2,354 (1,500-3,532)                       |
| Servier      | 206 (15.0%)                      | 4,344 (12.81%)                      | 283,954.11 (12.3%)                      | 523,699.04 (8.6%)               | 2,542 (SD=6,636)                       | 1,647 (546-2,939)                         |

| Company              | Number of events (% of category) | Number of attendees (% of category) | Total cost of food and beverage (\$AUD) | Total cost of functions (\$AUD) | Mean total cost per event (SD) (AUD\$) | Median total cost per event (IQR) (AUD\$) |
|----------------------|----------------------------------|-------------------------------------|-----------------------------------------|---------------------------------|----------------------------------------|-------------------------------------------|
| Sanofi               | 119 (8.7%)                       | 3,798 (11.20%)                      | 100,970.91 (4.4%)                       | 190,200.21 (3.1%)               | 1,598 (SD=3,205)                       | 440 (120-1,755)                           |
| Overactive bladder   | 190                              | 21,270                              | 467,096                                 | 1,136,665                       | 5,951 (SD=41,070)                      | 2,024 (773-3,379)                         |
| Astellas             | 77 (40.5%)                       | 2,294 (10.8%)                       | 113,572 (24.3%)                         | 209,663.47 (18.5%)              | 2,723 (SD=2,616)                       | 2,277 (1,568-2,956)                       |
| CSL                  | 76 (40.0%)                       | 1,950 (9.2%)                        | 94,902 (20.3%)                          | 181,431 (16.0%)                 | 2,387 (SD=2,399)                       | 1,664.50 (169-3,579)                      |
| AstraZeneca          | 9 (4.7%)                         | 194 (0.9%)                          | 3,802 (0.8%)                            | 11,911 (1.0%)                   | 1,323 (SD=883)                         | 795.07 (795-1,778)                        |
| Allergan             | 6 (3.2%)                         | 681 (3.2%)                          | 14,068 (3.0%)                           | 54,569 (4.8%)                   | 9,095 (SD=6,445)                       | 10,654 (1,389-15,148)                     |
| Bristol-Myers Squibb | 6 (3.2%)                         | 2,710 (12.7%)                       | 900 (0.2%)                              | 66,400 (5.8%)                   | 11,067 (SD=7,645)                      | 16,000 (1,350-16,000)                     |

On-line Appendix Figure 3.1

Annual sales of agomelatine, quetiapine for depression (Seroquel XR) and other formulations of quetiapine (Sequase, Seroquel)

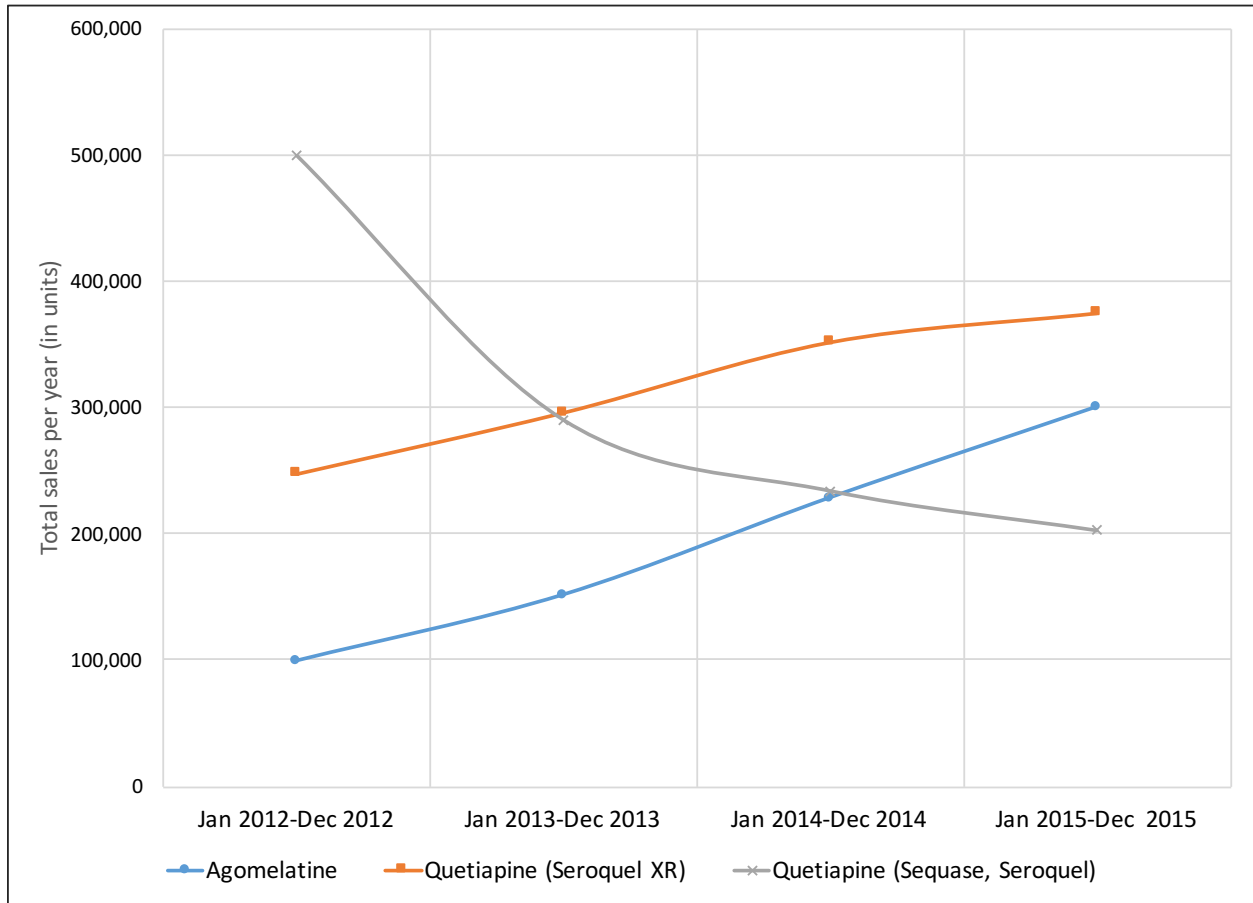

Agomelatine: 1 unit = 28 days@ 25mg/day; quetiapine (Seroquel XR, Sequase, Seroquel): 1 unit = 60 days (various doses) Source: IMS Quintiles

On-line Appendix Figure 3.2

Osteoporosis-related events sponsored by Sanofi

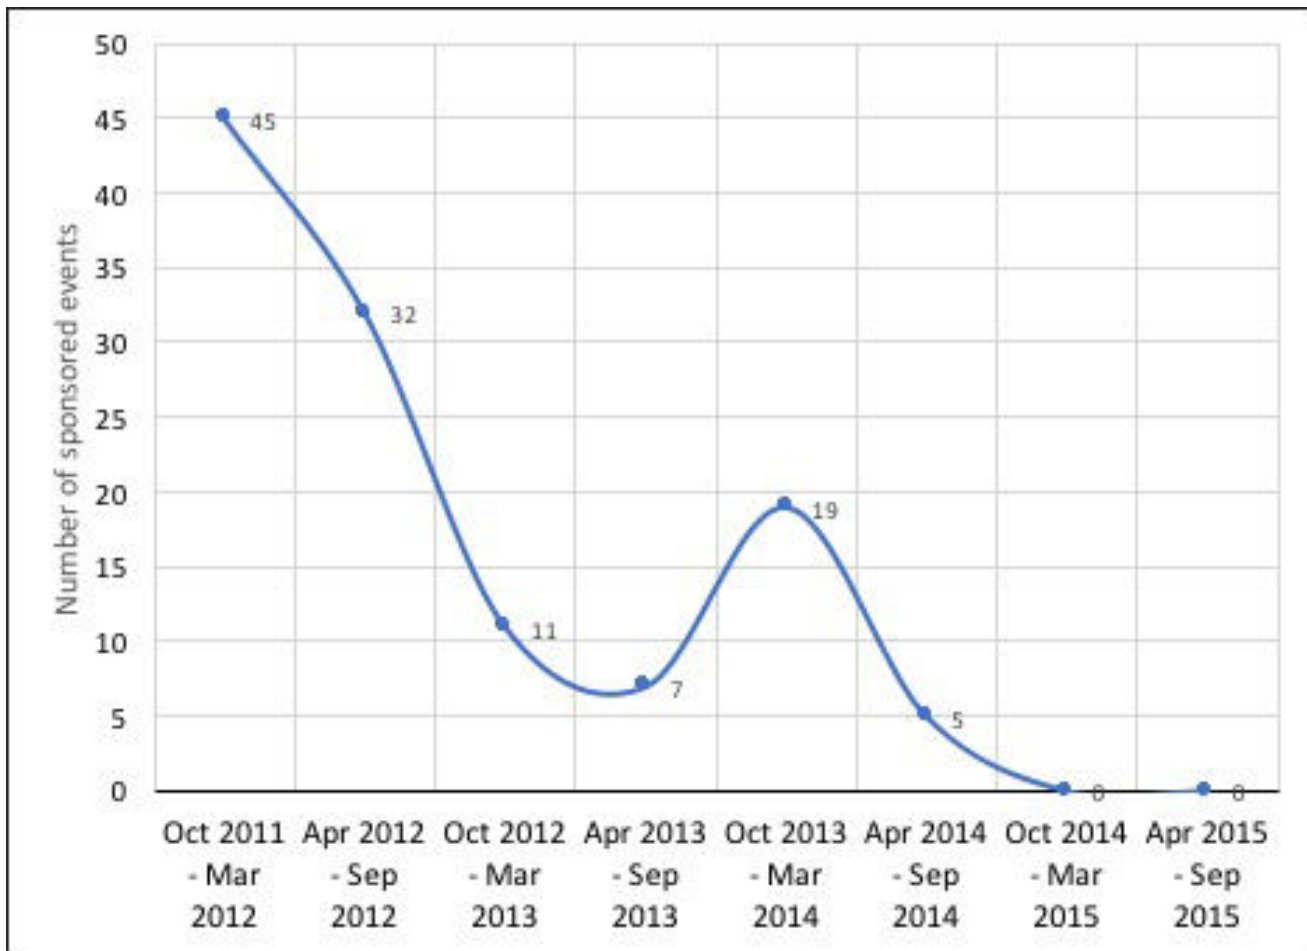

On-line Appendix Figure 3.3

Number of scripts dispensed for osteoporosis drugs, Pharmaceutical Benefits Scheme (PBS)

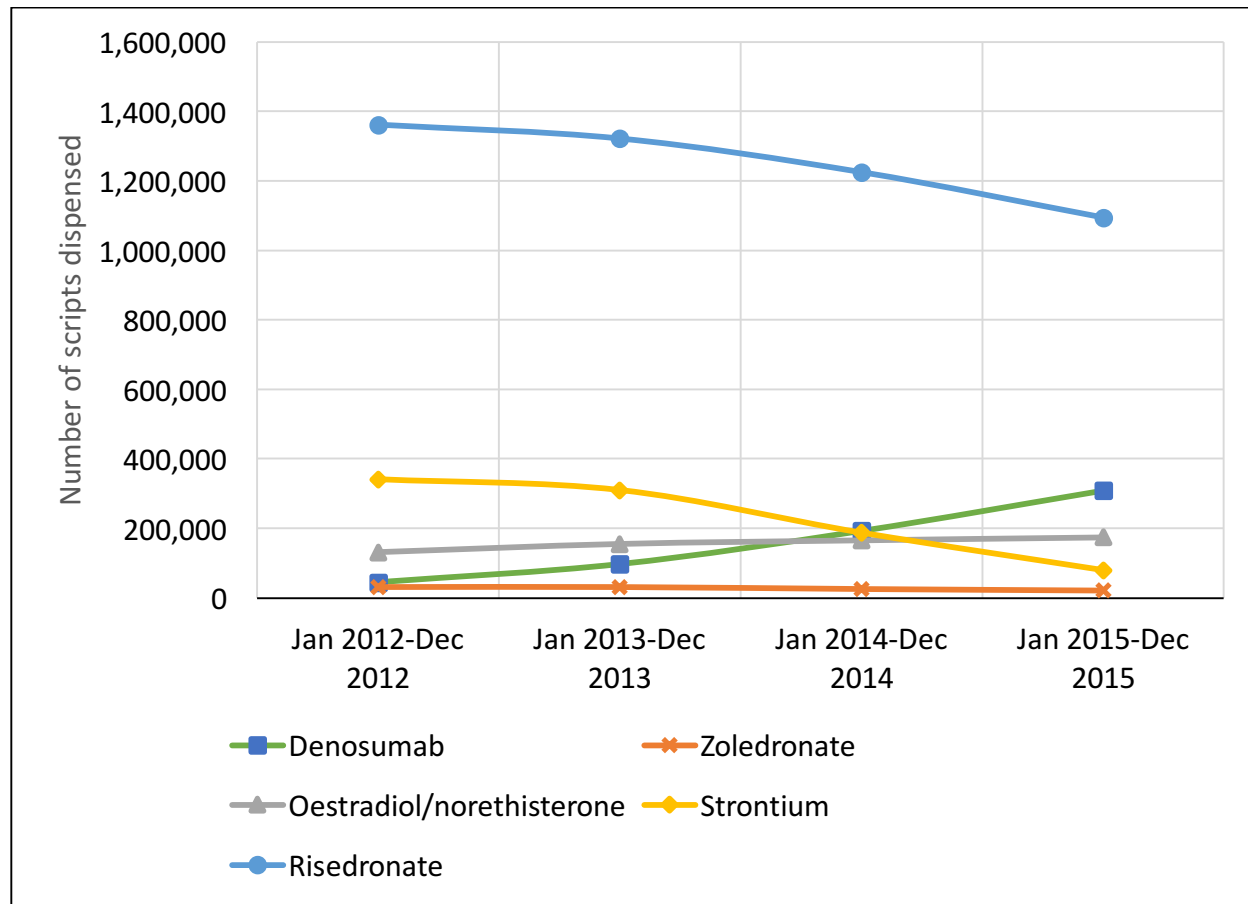

Source: Australian Statistics on Medicines 2012 to 2015. Available at: <https://www.pbs.gov.au/info/browse/statistics#ASM>

## On-line Appendix Figure 3.4

## Event sponsorship over the study period by lead overactive bladder sponsors

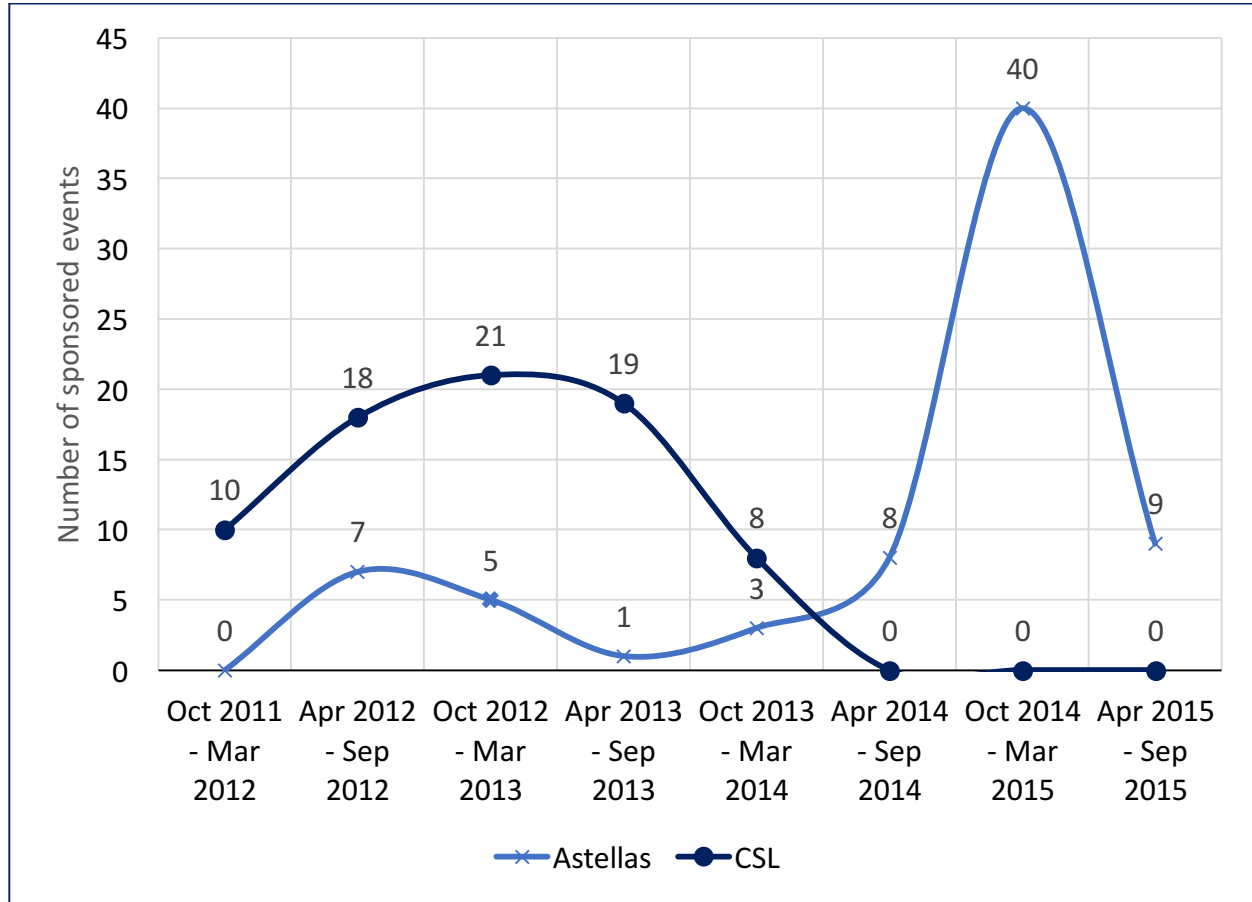

*Note:* CSL marketed solifenacin in Australia from February 2011 to October 2014, when marketing rights shifted to Astellas. Astellas also markets mirabegron, approved in Australia in February 2014.

**On-line Appendix Figure 3.5****Sales of non-PBS funded overactive bladder drugs over the study period**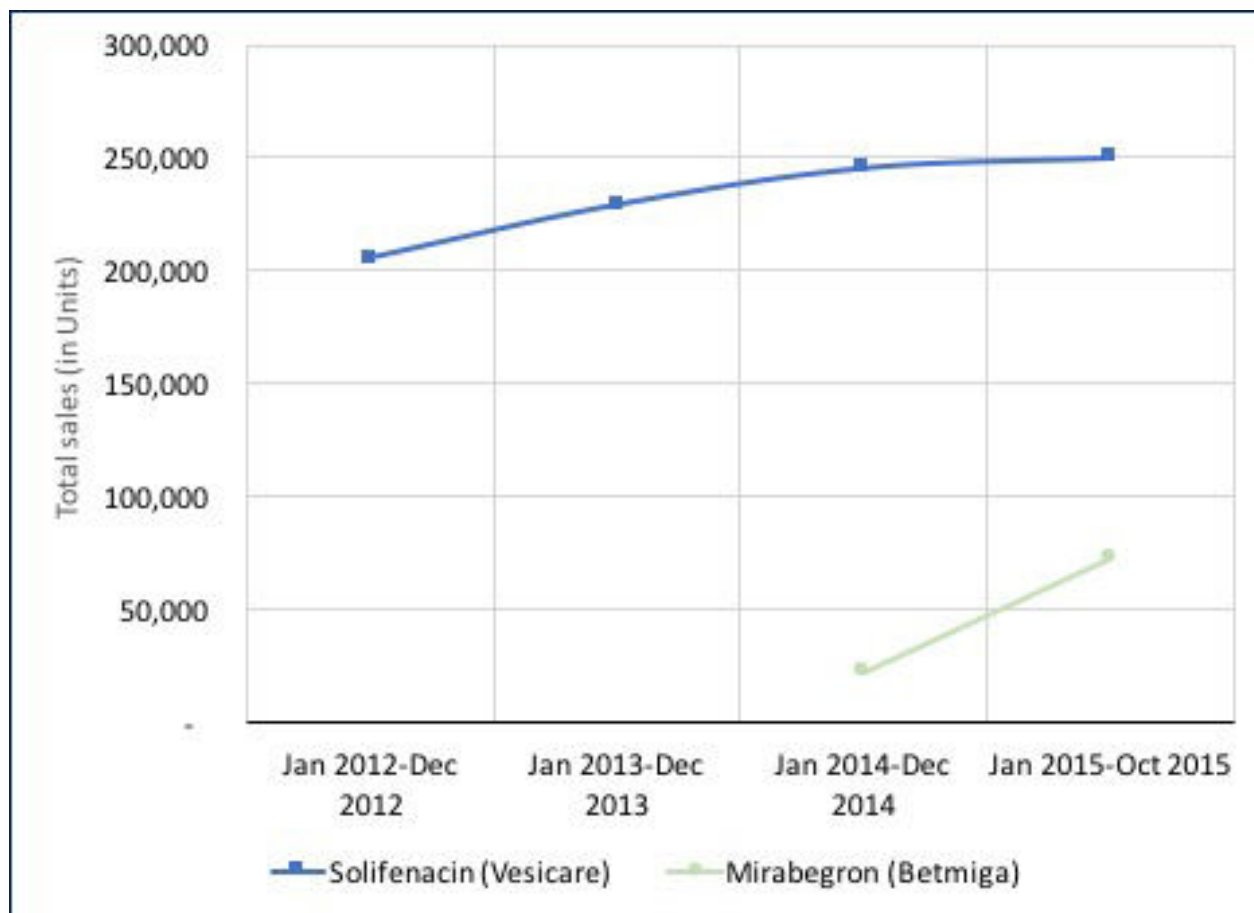

Mirabegron: 1 unit =30 days@ 25mg/day; solifenacin: 30 days@ 5mg or 10mg/day. Source: IMS Quintiles

STROBE Statement—Checklist of items that should be included in reports of *cohort studies*

|                              | Item No | Recommendation                                                                                                                                                                                                    | Page number                                                                |
|------------------------------|---------|-------------------------------------------------------------------------------------------------------------------------------------------------------------------------------------------------------------------|----------------------------------------------------------------------------|
| <b>Title and abstract</b>    | 1       | (a) Indicate the study's design with a commonly used term in the title or the abstract                                                                                                                            | Title page                                                                 |
|                              |         | (b) Provide in the abstract an informative and balanced summary of what was done and what was found                                                                                                               | Abstract                                                                   |
| <b>Introduction</b>          |         |                                                                                                                                                                                                                   |                                                                            |
| Background/rationale         | 2       | Explain the scientific background and rationale for the investigation being reported                                                                                                                              | Page 5-7                                                                   |
| Objectives                   | 3       | State specific objectives, including any prespecified hypotheses                                                                                                                                                  | Page 6                                                                     |
| <b>Methods</b>               |         |                                                                                                                                                                                                                   |                                                                            |
| Study design                 | 4       | Present key elements of study design early in the paper                                                                                                                                                           | Page 7                                                                     |
| Setting                      | 5       | Describe the setting, locations, and relevant dates, including periods of recruitment, exposure, follow-up, and data collection                                                                                   | Page 7                                                                     |
| Participants                 | 6       | (a) Give the eligibility criteria, and the sources and methods of selection of participants. Describe methods of follow-up<br>(b) For matched studies, give matching criteria and number of exposed and unexposed | Page 7-9 on-line appendix table 1 ^2                                       |
| Variables                    | 7       | Clearly define all outcomes, exposures, predictors, potential confounders, and effect modifiers. Give diagnostic criteria, if applicable                                                                          | Page 7-8 (drug data);<br>On-line tables 1 & 2 (event codes)                |
| Data sources/<br>measurement | 8*      | For each variable of interest, give sources of data and details of methods of assessment (measurement). Describe comparability of assessment methods if there is more than one group                              | Page 7-8 (drug data);<br>On-line appendix tables 1 & 2 (event codes)       |
| Bias                         | 9       | Describe any efforts to address potential sources of bias                                                                                                                                                         | Page 9: coder was blinded to sponsor, attendees and event characteristics. |
| Study size                   | 10      | Explain how the study size was arrived at                                                                                                                                                                         | N/A<br>Population-based                                                    |
| Quantitative variables       | 11      | Explain how quantitative variables were handled in the analyses. If applicable, describe which groupings were chosen and why                                                                                      | Page 7-9.<br>Quantitative variables were based on coding above.            |
| Statistical methods          | 12      | (a) Describe all statistical methods, including those used to control for confounding                                                                                                                             | Page 9                                                                     |
|                              |         | (b) Describe any methods used to examine subgroups and interactions                                                                                                                                               | N/A                                                                        |
|                              |         | (c) Explain how missing data were addressed                                                                                                                                                                       | N/A                                                                        |
|                              |         | (d) If applicable, explain how loss to follow-up was addressed                                                                                                                                                    | N/A                                                                        |
|                              |         | (e) Describe any sensitivity analyses                                                                                                                                                                             |                                                                            |
| <b>Results</b>               |         |                                                                                                                                                                                                                   |                                                                            |
| Participants                 | 13*     | (a) Report numbers of individuals at each stage of study—eg numbers potentially eligible, examined for eligibility,                                                                                               | N/A                                                                        |



|                          |     |                                                                                                                                                                                                              |                                 |
|--------------------------|-----|--------------------------------------------------------------------------------------------------------------------------------------------------------------------------------------------------------------|---------------------------------|
|                          |     | confirmed eligible, included in the study, completing follow-up, and analysed                                                                                                                                |                                 |
|                          |     | (b) Give reasons for non-participation at each stage                                                                                                                                                         |                                 |
|                          |     | (c) Consider use of a flow diagram                                                                                                                                                                           |                                 |
| Descriptive data         | 14* | (a) Give characteristics of study participants (eg demographic, clinical, social) and information on exposures and potential confounders                                                                     | N/A                             |
|                          |     | (b) Indicate number of participants with missing data for each variable of interest                                                                                                                          |                                 |
|                          |     | (c) Summarise follow-up time (eg, average and total amount)                                                                                                                                                  |                                 |
| Outcome data             | 15* | Report numbers of outcome events or summary measures over time                                                                                                                                               | Pages 10-12 and online appendix |
| Main results             | 16  | (a) Give unadjusted estimates and, if applicable, confounder-adjusted estimates and their precision (eg, 95% confidence interval). Make clear which confounders were adjusted for and why they were included | Pages 10-12 and online appendix |
|                          |     | (b) Report category boundaries when continuous variables were categorized                                                                                                                                    | N/A                             |
|                          |     | (c) If relevant, consider translating estimates of relative risk into absolute risk for a meaningful time period                                                                                             | Page 10                         |
| Other analyses           | 17  | Report other analyses done—eg analyses of subgroups and interactions, and sensitivity analyses                                                                                                               | N/A                             |
| <b>Discussion</b>        |     |                                                                                                                                                                                                              |                                 |
| Key results              | 18  | Summarise key results with reference to study objectives                                                                                                                                                     | Page 12                         |
| Limitations              | 19  | Discuss limitations of the study, taking into account sources of potential bias or imprecision. Discuss both direction and magnitude of any potential bias                                                   | Page 13-14                      |
| Interpretation           | 20  | Give a cautious overall interpretation of results considering objectives, limitations, multiplicity of analyses, results from similar studies, and other relevant evidence                                   | Pages 14-15                     |
| Generalisability         | 21  | Discuss the generalisability (external validity) of the study results                                                                                                                                        | Page 15                         |
| <b>Other information</b> |     |                                                                                                                                                                                                              |                                 |
| Funding                  | 22  | Give the source of funding and the role of the funders for the present study and, if applicable, for the original study on which the present article is based                                                | Page 2                          |

\*Give information separately for exposed and unexposed groups.

**Note:** An Explanation and Elaboration article discusses each checklist item and gives methodological background and published examples of transparent reporting. The STROBE checklist is best used in conjunction with this article (freely available on the Web sites of PLoS Medicine at <http://www.plosmedicine.org/>, Annals of Internal Medicine at <http://www.annals.org/>, and Epidemiology at <http://www.epidem.com/>). Information on the STROBE Initiative is available at <http://www.strobe-statement.org>.
