# Supplementary material for: Does industry-sponsored education foster overdiagnosis and overtreatment of depression, osteoporosis and over­active bladder syndrome? An Australian cohort study
Source: PubMed Central journal article supplement — BMJ Open. 2018 Feb 13;8(2):e019027. doi: 10.1136/bmjopen-2017-019027 (PMC5829862; doi:10.1136/bmjopen-2017-019027), 2018-02-13
Supplement: bmjopen-2017-019027supp001.pdf [file bmjopen-2017-019027supp001.pdf]

**On-line Appendix:**

**Mintzes et al. Does industry-sponsored education foster overdiagnosis and overtreatment of depression, osteoporosis and overactive bladder syndrome? An Australian cohort study**

**Appendix Table 1:  
Coding of event characteristic and audience variables**

| Variable name                | Keyword search                                                                                                                                                                                                                                                                                                                                                                                                                                                                                                                                                                                                                                                                                                                                                                                                                                                                                                                                                                                                                                                                                                                                                                                                                                                                                                              |
|------------------------------|-----------------------------------------------------------------------------------------------------------------------------------------------------------------------------------------------------------------------------------------------------------------------------------------------------------------------------------------------------------------------------------------------------------------------------------------------------------------------------------------------------------------------------------------------------------------------------------------------------------------------------------------------------------------------------------------------------------------------------------------------------------------------------------------------------------------------------------------------------------------------------------------------------------------------------------------------------------------------------------------------------------------------------------------------------------------------------------------------------------------------------------------------------------------------------------------------------------------------------------------------------------------------------------------------------------------------------|
| COMPANY                      | A. Menarini Australia Pty Ltd; Abbott Australasia Pty Ltd OR AbbVie Pty Ltd; Actelion Pharmaceuticals Australia Pty Ltd; Alexion Pharmaceuticals Australasia PTY LTD; Allergan Australia Pty Ltd; Amgen Australia; Astellas Pharma Australia Pty Ltd; Astrazeneca Pty Ltd; Baxter Healthcare Pty Ltd; Bayer Australia Ltd; Besins Healthcare Australia; BioCeuticals; Biogen Idec Australia Pty Limited; Boehringer Ingelheim Pty Limited; Bristol-Myers Squibb Australia Pty Limited; Celgene Pty Ltd; CSL (includes also bioCSL Australia Pty Ltd and CSL Behring); Eisai Australia Pty Ltd; Eli Lilly Australia Pty Ltd; Fresenius Kabi Australia; Gilead Sciences Pty.; GlaxoSmithKline Australia Pty Ltd *(GSK); iNova Pharmaceuticals (Aus) Pty Ltd; IPSEN Pty Ltd; Janssen; LEO Pharma Pty Ltd; Lundbeck Australia; Merck Serono Australia Pty Ltd; MSD Australia Pty Ltd; Mundipharma Pty Ltd; Mylan EPD; Norgine Pty Limited; Novartis Pharmaceuticals Australia Pty Limited (includes also Alcon Laboratories); Novo Nordisk Pharmaceuticals; Pfizer Australia; Roche Products Pty Limited; Sanofi/Sanofi Aventis Australia Pty Ltd; Servier Laboratories (Australia) Pty Ltd; Shire Australia; Takeda Pharmaceuticals Australia Pty Ltd (includes also Nycomed Pty Ltd Report); UCB Pharma; Vifor Pharma Pty Ltd |
| LOCATION                     |                                                                                                                                                                                                                                                                                                                                                                                                                                                                                                                                                                                                                                                                                                                                                                                                                                                                                                                                                                                                                                                                                                                                                                                                                                                                                                                             |
| New South Wales              | NSW, New South Wales, Sydney, other cities or suburbs, and postal codes of NSW*                                                                                                                                                                                                                                                                                                                                                                                                                                                                                                                                                                                                                                                                                                                                                                                                                                                                                                                                                                                                                                                                                                                                                                                                                                             |
| Victoria                     | VIC, Victoria, Melbourne, other cities or suburbs and postal codes of VIC*                                                                                                                                                                                                                                                                                                                                                                                                                                                                                                                                                                                                                                                                                                                                                                                                                                                                                                                                                                                                                                                                                                                                                                                                                                                  |
| Australian Capital Territory | ACT, Australian Capital Territory, Canberra, other cities or suburbs, and postal codes of ACT*                                                                                                                                                                                                                                                                                                                                                                                                                                                                                                                                                                                                                                                                                                                                                                                                                                                                                                                                                                                                                                                                                                                                                                                                                              |
| Western Australia            | WA, Western Australia, Perth, other cities or suburbs, and postal codes of WA*                                                                                                                                                                                                                                                                                                                                                                                                                                                                                                                                                                                                                                                                                                                                                                                                                                                                                                                                                                                                                                                                                                                                                                                                                                              |

| Variable name                                                                                                                                                                                                                                                                                                                                                        | Keyword search                                                                                                                                                                                                                                                                                                                                                                                |
|----------------------------------------------------------------------------------------------------------------------------------------------------------------------------------------------------------------------------------------------------------------------------------------------------------------------------------------------------------------------|-----------------------------------------------------------------------------------------------------------------------------------------------------------------------------------------------------------------------------------------------------------------------------------------------------------------------------------------------------------------------------------------------|
| South Australia                                                                                                                                                                                                                                                                                                                                                      | SA, South Australia, Adelaide, other cities or suburbs, and postal codes of SA*                                                                                                                                                                                                                                                                                                               |
| Northern Territory                                                                                                                                                                                                                                                                                                                                                   | NT, North Territory, other cities or suburbs, and postal codes of NT*                                                                                                                                                                                                                                                                                                                         |
| Tasmania                                                                                                                                                                                                                                                                                                                                                             | TAS, Tasmania, Hobart, other cities or suburbs, and postal codes of Tasmania*                                                                                                                                                                                                                                                                                                                 |
| Overseas                                                                                                                                                                                                                                                                                                                                                             | Overseas: outside of Australia**                                                                                                                                                                                                                                                                                                                                                              |
| *Where the state or capital was not listed, events were hand coded based on postal codes, cities or suburbs                                                                                                                                                                                                                                                          |                                                                                                                                                                                                                                                                                                                                                                                               |
| **Events not taking place in an Australian state were hand-coded                                                                                                                                                                                                                                                                                                     |                                                                                                                                                                                                                                                                                                                                                                                               |
| <b>MEALS</b>                                                                                                                                                                                                                                                                                                                                                         |                                                                                                                                                                                                                                                                                                                                                                                               |
| • Lunch                                                                                                                                                                                                                                                                                                                                                              | Lunch                                                                                                                                                                                                                                                                                                                                                                                         |
| • Dinner                                                                                                                                                                                                                                                                                                                                                             | Dinner                                                                                                                                                                                                                                                                                                                                                                                        |
| • Breakfast                                                                                                                                                                                                                                                                                                                                                          | Breakfast                                                                                                                                                                                                                                                                                                                                                                                     |
| • Tea                                                                                                                                                                                                                                                                                                                                                                | Afternoon tea, morning tea, light refreshments, light meals, sandwiches & drinks, coffee cart, snack and beverage, sushi                                                                                                                                                                                                                                                                      |
| • All day events w/ meals                                                                                                                                                                                                                                                                                                                                            | Day delegate package*; conference package**                                                                                                                                                                                                                                                                                                                                                   |
| • Food unspecified                                                                                                                                                                                                                                                                                                                                                   | food & beverages, meals, drinks, in hospital catering, beverages, wine                                                                                                                                                                                                                                                                                                                        |
| • No meals provided                                                                                                                                                                                                                                                                                                                                                  | Sponsorship/accommodation only, no hospitality provided, travel/accommodation only (domestic events)                                                                                                                                                                                                                                                                                          |
| *Note: "day delegate package" consisted of entries where multiple meals were listed ((Lunch, tea), (Breakfast, tea), (Dinner, tea), (Breakfast, lunch, tea))                                                                                                                                                                                                         |                                                                                                                                                                                                                                                                                                                                                                                               |
| **Note: "conference package" consisted of events lasting multiple days and typically included a day delegate package, often accommodation (food and beverage not reported separately), registration (food and beverage not reported separately), or travel (including flights, registration, airfares, accommodation and food and beverages not reported separately) |                                                                                                                                                                                                                                                                                                                                                                                               |
| <b>EVENTS HELD IN CLINICAL SETTING</b>                                                                                                                                                                                                                                                                                                                               | Hospital; clinic; practice; medicare local; health centre; surgery; medical centre; medical; health care centre; specialist centre; cancer centre; cancer care centre; heart centre; medical and dental centre; endocrine centre; radiotherapy centre; radiation centre; optical centre; eye centre; renal unit; ward; department; dept; community health; family planning; education centre. |
| <b>PROFESSIONAL STATUS</b>                                                                                                                                                                                                                                                                                                                                           |                                                                                                                                                                                                                                                                                                                                                                                               |
| • Primary care doctors                                                                                                                                                                                                                                                                                                                                               | GP; general practitioner; family medicine.                                                                                                                                                                                                                                                                                                                                                    |

| Variable name                                                        | Keyword search                                                                                                                                                                                                                                                                                                                                                                                                                                                                                                                                                                                                                                                                                                                                                                                                                                                                                                                                                                                                                                                                                                                                                                                                                |
|----------------------------------------------------------------------|-------------------------------------------------------------------------------------------------------------------------------------------------------------------------------------------------------------------------------------------------------------------------------------------------------------------------------------------------------------------------------------------------------------------------------------------------------------------------------------------------------------------------------------------------------------------------------------------------------------------------------------------------------------------------------------------------------------------------------------------------------------------------------------------------------------------------------------------------------------------------------------------------------------------------------------------------------------------------------------------------------------------------------------------------------------------------------------------------------------------------------------------------------------------------------------------------------------------------------|
| <ul style="list-style-type: none"> <li>Nurses</li> </ul>             | Nurse                                                                                                                                                                                                                                                                                                                                                                                                                                                                                                                                                                                                                                                                                                                                                                                                                                                                                                                                                                                                                                                                                                                                                                                                                         |
| <ul style="list-style-type: none"> <li>Pharmacists</li> </ul>        | Pharmacist                                                                                                                                                                                                                                                                                                                                                                                                                                                                                                                                                                                                                                                                                                                                                                                                                                                                                                                                                                                                                                                                                                                                                                                                                    |
| <ul style="list-style-type: none"> <li>Trainees</li> </ul>           | Registrar; resident; intern; student; advanced trainee; RMO; resident medical officer; JHO; SHO; senior house officer; PHO; principal house officer; fellow                                                                                                                                                                                                                                                                                                                                                                                                                                                                                                                                                                                                                                                                                                                                                                                                                                                                                                                                                                                                                                                                   |
| <ul style="list-style-type: none"> <li>Specialty care</li> </ul>     | Specialist; consultant; senior medical officer; SMO; visiting medical officer; VMO; general medicine; general physician; *ology physician; *ology doctor; allergist; allergy physician; anesthesiologist; anesthetist; anaesthesiologist; anaesthetist; andrologist; cardiologist; dermatologist, diabetologist; emergency physician; emergency medicine physician; endocrinologist; epileptologist; gastroenterologist; geriatrician; geriatric physician; gynaecologist; obstetrician; OB/GYN; haematologist; hematologist; hepatologist; immunologist; infectious disease physician; infectious disease doctor; internal medicine physician; microbiologist; neonatologist; neurologist; nuclear medicine physician; nephrologist; renal physician; renal doctor; urologist; oncologist; pharmacologist; pulmonologist; psychogeriatrician; ophthalmologist; rheumatologist; radiologist; respiratory physician; respiratory medicine physician; respiratory medicine doctor; palliative care physician; pathologist; sexual health physician; sexual health doctor; psychiatrist; psychiatry doctor; paediatrician; surgeon; surgery doctor; intensive care doctor; intensivist; intensive care physician; cardiothoracic |
| CLINICAL FOCUS                                                       |                                                                                                                                                                                                                                                                                                                                                                                                                                                                                                                                                                                                                                                                                                                                                                                                                                                                                                                                                                                                                                                                                                                                                                                                                               |
| <ul style="list-style-type: none"> <li>Allergy/Immunology</li> </ul> | Allergist; allergy; immunologist; immunology                                                                                                                                                                                                                                                                                                                                                                                                                                                                                                                                                                                                                                                                                                                                                                                                                                                                                                                                                                                                                                                                                                                                                                                  |
| <ul style="list-style-type: none"> <li>Anaesthesiology</li> </ul>    | Anesthesiologist; anesthetist; anaesthesiologist; anaesthetist; anaesthesiology                                                                                                                                                                                                                                                                                                                                                                                                                                                                                                                                                                                                                                                                                                                                                                                                                                                                                                                                                                                                                                                                                                                                               |
| <ul style="list-style-type: none"> <li>Andrology</li> </ul>          | Andrologist                                                                                                                                                                                                                                                                                                                                                                                                                                                                                                                                                                                                                                                                                                                                                                                                                                                                                                                                                                                                                                                                                                                                                                                                                   |
| <ul style="list-style-type: none"> <li>Cardiology</li> </ul>         | Cardiologist; cardiology                                                                                                                                                                                                                                                                                                                                                                                                                                                                                                                                                                                                                                                                                                                                                                                                                                                                                                                                                                                                                                                                                                                                                                                                      |
| <ul style="list-style-type: none"> <li>Dermatology</li> </ul>        | Dermatologist; dermatology                                                                                                                                                                                                                                                                                                                                                                                                                                                                                                                                                                                                                                                                                                                                                                                                                                                                                                                                                                                                                                                                                                                                                                                                    |
| <ul style="list-style-type: none"> <li>Emergency</li> </ul>          | Emergency                                                                                                                                                                                                                                                                                                                                                                                                                                                                                                                                                                                                                                                                                                                                                                                                                                                                                                                                                                                                                                                                                                                                                                                                                     |
| <ul style="list-style-type: none"> <li>Endocrinology</li> </ul>      | endocrinologist; endocrinology; diabetologist; diabetology; diabetes                                                                                                                                                                                                                                                                                                                                                                                                                                                                                                                                                                                                                                                                                                                                                                                                                                                                                                                                                                                                                                                                                                                                                          |
| <ul style="list-style-type: none"> <li>Gastroenterology</li> </ul>   | Gastroenterologist; gastroenterology; Hepatologist; hepatology                                                                                                                                                                                                                                                                                                                                                                                                                                                                                                                                                                                                                                                                                                                                                                                                                                                                                                                                                                                                                                                                                                                                                                |
| <ul style="list-style-type: none"> <li>Geriatrics</li> </ul>         | Geriatrician; geriatric; psychogeriatrician; elderly                                                                                                                                                                                                                                                                                                                                                                                                                                                                                                                                                                                                                                                                                                                                                                                                                                                                                                                                                                                                                                                                                                                                                                          |
| <ul style="list-style-type: none"> <li>Haematology</li> </ul>        | Haematologist; haematology; hematology; hematologist                                                                                                                                                                                                                                                                                                                                                                                                                                                                                                                                                                                                                                                                                                                                                                                                                                                                                                                                                                                                                                                                                                                                                                          |

| Variable name                                                                                                | Keyword search                                                                                                                    |
|--------------------------------------------------------------------------------------------------------------|-----------------------------------------------------------------------------------------------------------------------------------|
| • Infectious Diseases                                                                                        | Infectious disease; microbiologist; microbiology                                                                                  |
| • Internal Medicine                                                                                          | Internal medicine                                                                                                                 |
| • Intensive care                                                                                             | Intensive care; intensivist; critical care                                                                                        |
| • Neonatology                                                                                                | Neonatologist; neonatology; NICU; neonatal                                                                                        |
| • Nuclear medicine                                                                                           | Nuclear medicine                                                                                                                  |
| • Nephrology                                                                                                 | Nephrologist, nephrology; renal; kidney                                                                                           |
| • Neurology                                                                                                  | Neurologist; neurology; epileptologist                                                                                            |
| • Obstetrics/Gynaecology                                                                                     | Gynaecologist; gynaecology; obstetrician; OB/GYN; obstetrics                                                                      |
| • Oncology                                                                                                   | Oncologist; oncology; cancer                                                                                                      |
| • Ophthalmology                                                                                              | Ophthalmologist; ophthalmology                                                                                                    |
| • Otolaryngology                                                                                             | Otolaryngology                                                                                                                    |
| • Palliative care                                                                                            | Palliative care                                                                                                                   |
| • Pathology                                                                                                  | Pathologist; pathology                                                                                                            |
| • Pharmacology                                                                                               | Pharmacologist; pharmacology                                                                                                      |
| • Paediatrics                                                                                                | Paediatrician; paediatric*; pediatric*                                                                                            |
| • Psychiatry                                                                                                 | Psychiatrist; psychiatry; mental health                                                                                           |
| • Radiology                                                                                                  | Radiologist; radiology                                                                                                            |
| • Rheumatology                                                                                               | Rheumatologist; rheumatology                                                                                                      |
| • Respiratory medicine                                                                                       | Lung specialist; respiratory; pulmonologist                                                                                       |
| • Sexual health                                                                                              | Sexual health                                                                                                                     |
| • Surgery                                                                                                    | Surgeon; surgery; surgical; operating theatre                                                                                     |
| • Urology                                                                                                    | Urologist; urology                                                                                                                |
| *Note: clinical focus is a proxy variable based on clinical specialty of attendees and/or event description. |                                                                                                                                   |
| EVENT TYPE                                                                                                   |                                                                                                                                   |
| • Meeting (not otherwise specified)                                                                          | Search for generic word “meeting”                                                                                                 |
| • Journal club                                                                                               | Journal club; journalclub                                                                                                         |
| • Inservice                                                                                                  | Inservice                                                                                                                         |
| • Workshop                                                                                                   | Workshop                                                                                                                          |
| • Grand rounds                                                                                               | Grand round; grandround                                                                                                           |
| • Scientific meeting                                                                                         | scientific meeting; congress; conference AND NOT videoconference/teleconference                                                   |
| • Clinical meeting                                                                                           | internal meeting; departmental meeting; clinical meeting; case review, case conference; case study meeting; case study conference |
| • Multidisciplinary meeting                                                                                  | Multidisciplinary meeting                                                                                                         |

**Appendix Table 2:**

**Coding of three included conditions**

| Variable name      | Keyword search                                                                                                                                                                                                                                                                                                                                                                                                                                                                                                                                                                                   |
|--------------------|--------------------------------------------------------------------------------------------------------------------------------------------------------------------------------------------------------------------------------------------------------------------------------------------------------------------------------------------------------------------------------------------------------------------------------------------------------------------------------------------------------------------------------------------------------------------------------------------------|
| DEPRESSION         | Depress; Anx; Citalopram; Sertraline; Agomelatine; Vortioxetine; Amitriptyline; Clomipramine; Desvenlafaxine; Dothiepin; Doxepin; Duloxetine; Escitalopram; Fluoxetine; Fluvoxamine; Imipramine; Miaserin; Mirtazapine; Moclobemide; Paroxetine; Reboxetine; Tranylcypromine; Trimipramine; Venlafaxine; Brintellix; Valdoxan; Cymbalta; Anafranil; Pristiq; Sinequan; Andepira; Prozac; Tolvon; Avanza; Mirtazon; Remero; Edronax; Zoloft; Xydep; Altven; Efexor                                                                                                                                |
| OSTEOPOROSIS       | osteop; bone health; bone disease; metabolic bone disease; mineral bone disease; bone mineral; mineral bone; bone and calcium; fracture; Bisphosphonate; Denosumab; Zoledronic acid; Cinacalcet; Teriparatide; Alendronic acid; Alendronate; Cholecalciferol; Calcitriol; Calcium chloride; Disodium Pamidronate; Ibandronate; Raloxifene; Risedronate ; Salcatonin; Sodium Clodronate; Strontium ranelate; Tiludronate; Prolia; Forteo; Sensipar; Adronat; Fosamax; Dronalen; Rocaltrol; Risedronate; Aredia; Bondronat; Evifyne; Evista; Miacalcic; Protos; Skelid; Aclasta; Osteovan; Zometa. |
| OVERACTIVE BLADDER | Incontinence; Overactive AND bladder; Over active AND bladder; Betmiga; Darifenacin; Oxybutynin; Propantheline; Solifenacin; Tolterodine; Mirabegron; Ditropan; Vesicare; Detrusitol                                                                                                                                                                                                                                                                                                                                                                                                             |

**Appendix Table 3:**

**Top 5 sponsoring companies in total and per condition**

| <b>Company</b> | <b>Number of events (% of category)</b> | <b>Number of attendees (% of category)</b> | <b>Total cost of food and beverage (\$AUD)</b> | <b>Total cost of functions (\$AUD)</b> | <b>Mean total cost per event (SD) (AUD\$)</b> | <b>Median total cost per event (IQR) (AUD\$)</b> |
|----------------|-----------------------------------------|--------------------------------------------|------------------------------------------------|----------------------------------------|-----------------------------------------------|--------------------------------------------------|
| General        | 116,845                                 | 3,481,750                                  | 84,862,791                                     | 286,117,928                            | 2,449.70<br>(SD=15,020)                       | 263<br>(153-1,195)                               |
| AstraZeneca    | 13,968<br>(12.0%)                       | 435,686<br>(12.5%)                         | 12,725,027<br>.09 (15.0%)                      | 31,766,776<br>(11.1%)                  | 2,274<br>(SD=10,878)                          | 318<br>(165-2,261)                               |
| Novartis       | 10,120<br>(8.7%)                        | 244,069<br>(7.0%)                          | 6,600,502.<br>76 (7.8%)                        | 27,467,246<br>(9.6%)                   | 2,714<br>(SD=16,109)                          | 270<br>(167-1,154)                               |
| MSD            | 9,142<br>(7.8%)                         | 214,621<br>(6.2%)                          | 5,388,246.<br>54 (6.4%)                        | 18,352,116<br>(6.4%)                   | 2,007<br>(SD=9,274)                           | 341<br>(180-1,182)                               |
| Roche          | 7,383<br>(6.3%)                         | 174,878<br>(5.0%)                          | 2,891,426.<br>00 (3.4%)                        | 16,625,126<br>(5.8%)                   | 2,252<br>(SD=22,101)                          | 186 (129-284)                                    |
| Pfizer         | 7,125<br>(6.1%)                         | 188,439<br>(5.4%)                          | 3,740,677.<br>35 (4.4%)                        | 18,464,785<br>(6.5%)                   | 2,591<br>(SD=21,482)                          | 236 (141-573)                                    |
| Depression     | 1,567                                   | 41,472                                     | 2,441,950                                      | 6,259,581                              | 3,995<br>(SD=15,895)                          | 1,941<br>(659 – 3,264)                           |
| Servier        | 803<br>(51.2%)                          | 19,671<br>(47.4%)                          | 1,497,510<br>(61.3%)                           | 3,757,665<br>(60.0%)                   | 4,680<br>(SD=1,7837)                          | 2,164<br>(921 - 3,145)                           |
| AstraZeneca    | 361<br>(23.0%)                          | 9,577<br>(23.1%)                           | 551,985<br>(22.6%)                             | 1,269,764<br>(20.3%)                   | 3,517<br>(SD =5,306)                          | 1,082<br>(126-2,045)                             |
| Pfizer         | 251<br>(16.0%)                          | 5,160<br>(12.4%)                           | 182,306<br>(7.5%)                              | 326,255<br>(5.2%)                      | 1,300<br>(SD=1,846)                           | 420<br>(195-1,978)                               |
| Eli Lilly      | 57 (3.6%)                               | 1,175<br>(2.8%)                            | 28,902<br>(1.2%)                               | 47,485<br>(0.8%)                       | 833<br>(SD=1,591)                             | 165 (75-950)                                     |
| Janssen        | 33 (2.1%)                               | 974<br>(2.35%)                             | 5,760<br>(0.24%)                               | 56,953<br>(0.91%)                      | 1,726<br>(SD=5,788)                           | 187 (106-273)                                    |
| Osteoporosis   | 1,375                                   | 33,916                                     | 2,314,319                                      | 6,073,333                              | 4,417<br>(SD=21,611)                          | 686 (217-<br>2,500)                              |
| Amgen          | 431<br>(31.4%)                          | 10,120<br>(29.84%)                         | 943,254<br>(40.8%)                             | 2,114,304<br>(34.8%)                   | 4,906<br>(SD=29,502)                          | 259 (175-630)                                    |
| Novartis       | 274<br>(19.9%)                          | 5,735<br>(16.91%)                          | 308,064<br>(13.3%)                             | 971,212<br>(16.0%)                     | 3,545<br>(SD=16,701)                          | 369<br>(159-2,011)                               |
| GSK            | 249<br>(18.1%)                          | 5,273<br>(15.55%)                          | 474,364<br>(20.5%)                             | 928,803<br>(15.3%)                     | 3,730<br>(SD=11,982)                          | 2,354<br>(1,500-3,532)                           |
| Servier        | 206<br>(15.0%)                          | 4,344<br>(12.81%)                          | 283,954.11<br>(12.3%)                          | 523,699.04<br>(8.6%)                   | 2,542<br>(SD=6,636)                           | 1,647<br>(546-2,939)                             |

| <b>Company</b>       | <b>Number of events (% of category)</b> | <b>Number of attendees (% of category)</b> | <b>Total cost of food and beverage (\$AUD)</b> | <b>Total cost of functions (\$AUD)</b> | <b>Mean total cost per event (SD) (AUD\$)</b> | <b>Median total cost per event (IQR) (AUD\$)</b> |
|----------------------|-----------------------------------------|--------------------------------------------|------------------------------------------------|----------------------------------------|-----------------------------------------------|--------------------------------------------------|
| Sanofi               | 119 (8.7%)                              | 3,798 (11.20%)                             | 100,970.91 (4.4%)                              | 190,200.21 (3.1%)                      | 1,598 (SD=3,205)                              | 440 (120-1,755)                                  |
| Overactive bladder   | 190                                     | 21,270                                     | 467,096                                        | 1,136,665                              | 5,951 (SD=41,070)                             | 2,024 (773-3,379)                                |
| Astellas             | 77 (40.5%)                              | 2,294 (10.8%)                              | 113,572 (24.3%)                                | 209,663.47 (18.5%)                     | 2,723 (SD=2,616)                              | 2,277 (1,568-2,956)                              |
| CSL                  | 76 (40.0%)                              | 1,950 (9.2%)                               | 94,902 (20.3%)                                 | 181,431 (16.0%)                        | 2,387 (SD=2,399)                              | 1,664.50 (169-3,579)                             |
| AstraZeneca          | 9 (4.7%)                                | 194 (0.9%)                                 | 3,802 (0.8%)                                   | 11,911 (1.0%)                          | 1,323 (SD=883)                                | 795.07 (795-1,778)                               |
| Allergan             | 6 (3.2%)                                | 681 (3.2%)                                 | 14,068 (3.0%)                                  | 54,569 (4.8%)                          | 9,095 (SD=6,445)                              | 10,654 (1,389-15,148)                            |
| Bristol-Myers Squibb | 6 (3.2%)                                | 2,710 (12.7%)                              | 900 (0.2%)                                     | 66,400 (5.8%)                          | 11,067 (SD=7,645)                             | 16,000 (1,350-16,000)                            |

**On-line Appendix Figure 1**

**Annual sales of agomelatine, slow release quetiapine (Seroquel XR)\* and other formulations of quetiapine (Sequase, Seroquel)**

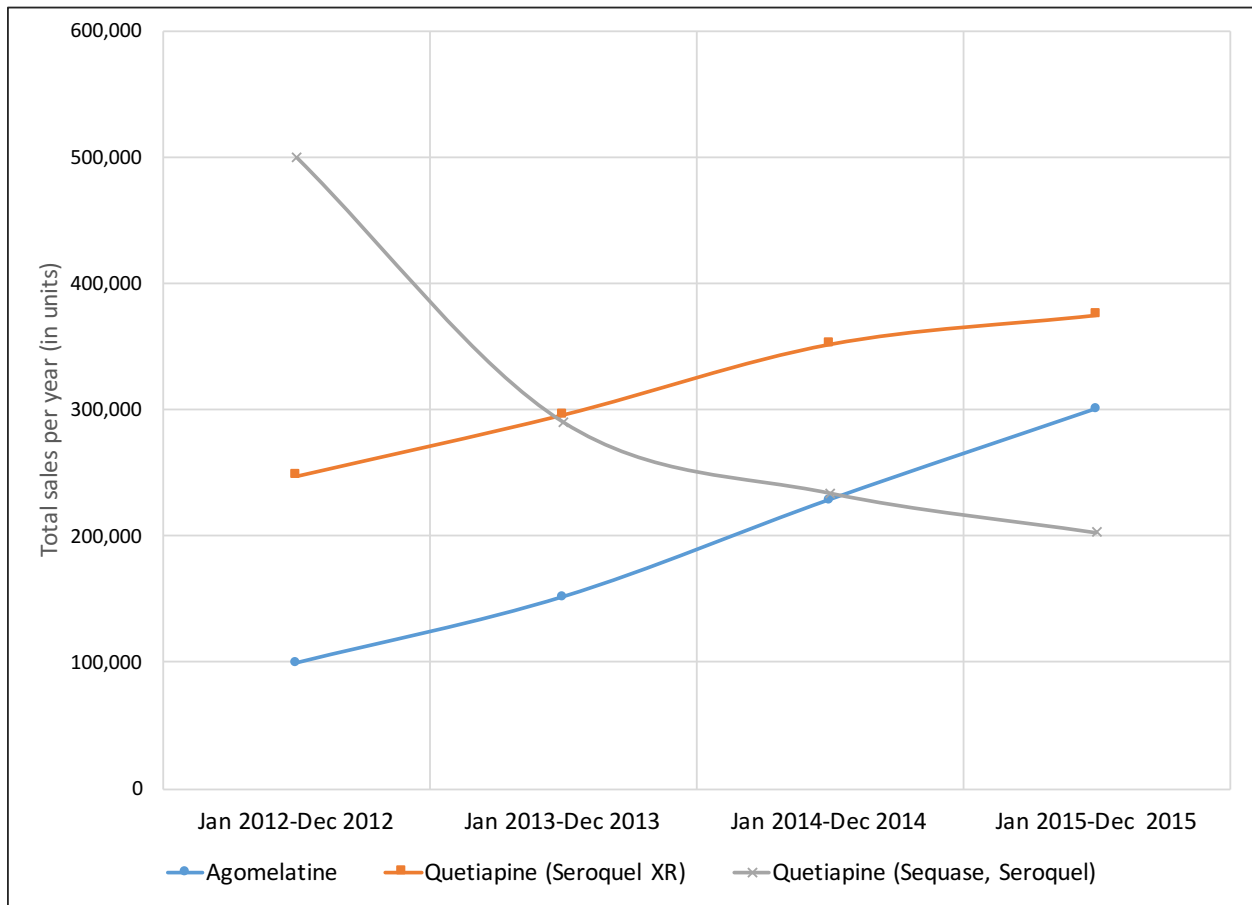

Agomelatine: 1 unit = 28 days@ 25mg/day; quetiapine (Seroquel XR, Sequase, Seroquel): 1 unit = 60 days (various doses) Source: IMS Quintiles

\*slow release quetiapine (Seroquel XR) is the only formulation of quetiapine that is indicated for use in depression and in generalised anxiety



On-line Appendix Figure 2

Osteoporosis-related events sponsored by Sanofi

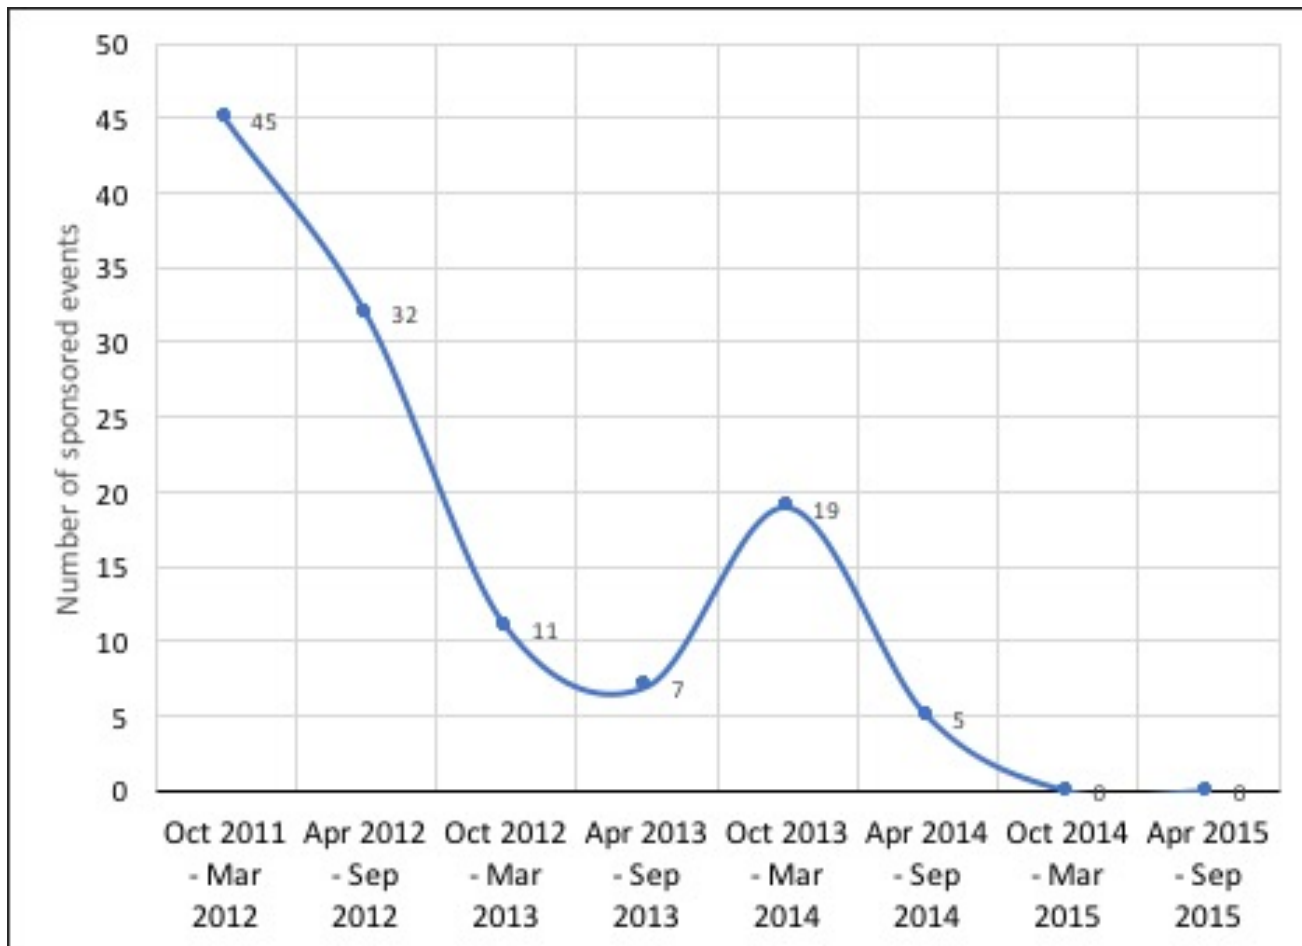

**On-line Appendix Figure 3**

**Number of scripts dispensed for osteoporosis drugs, Pharmaceutical Benefits Scheme (PBS)**

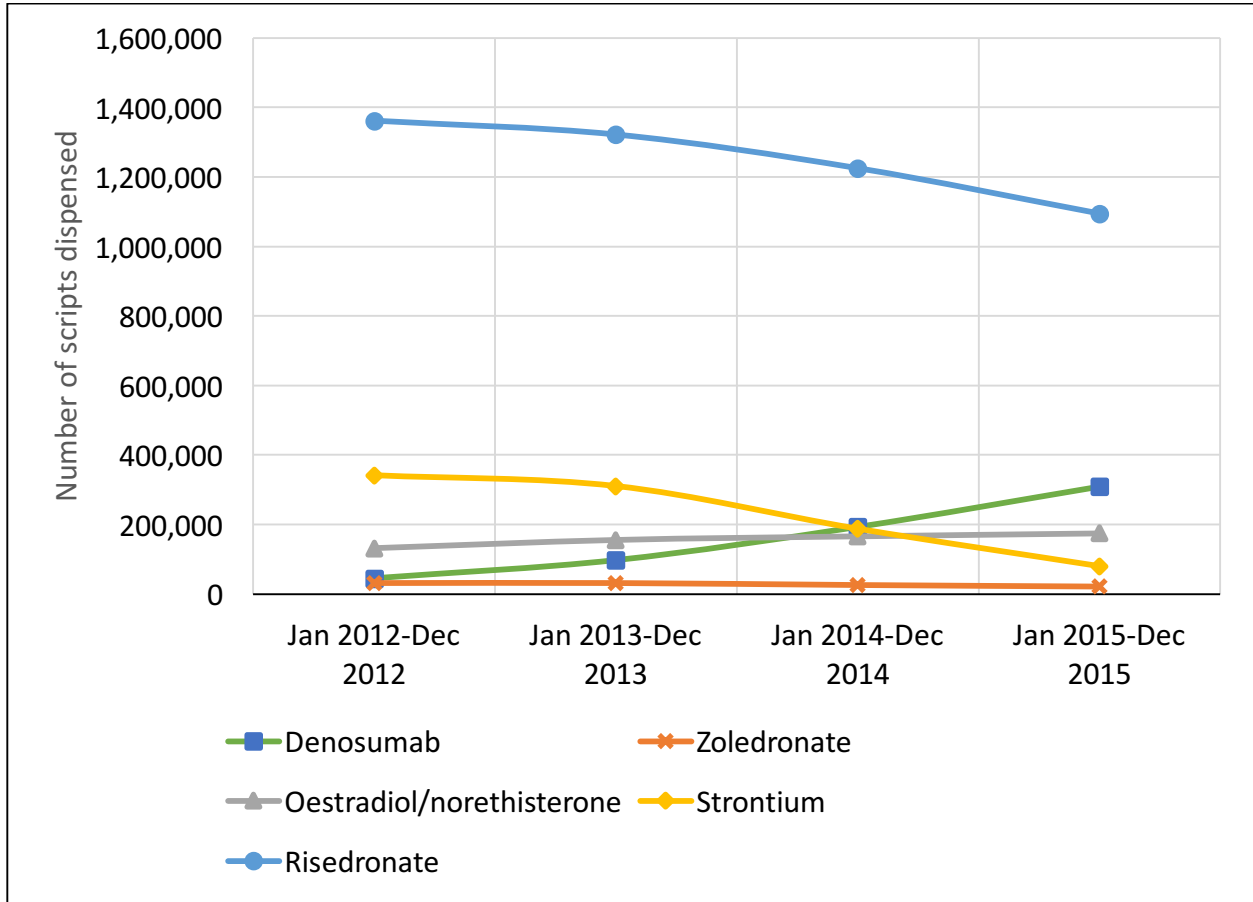

Source: Australian Statistics on Medicines 2012 to 2015. Available at: <https://www.pbs.gov.au/info/browse/statistics#ASM>

**On-line Appendix Figure 4**

**Event sponsorship over the study period by lead overactive bladder sponsors**

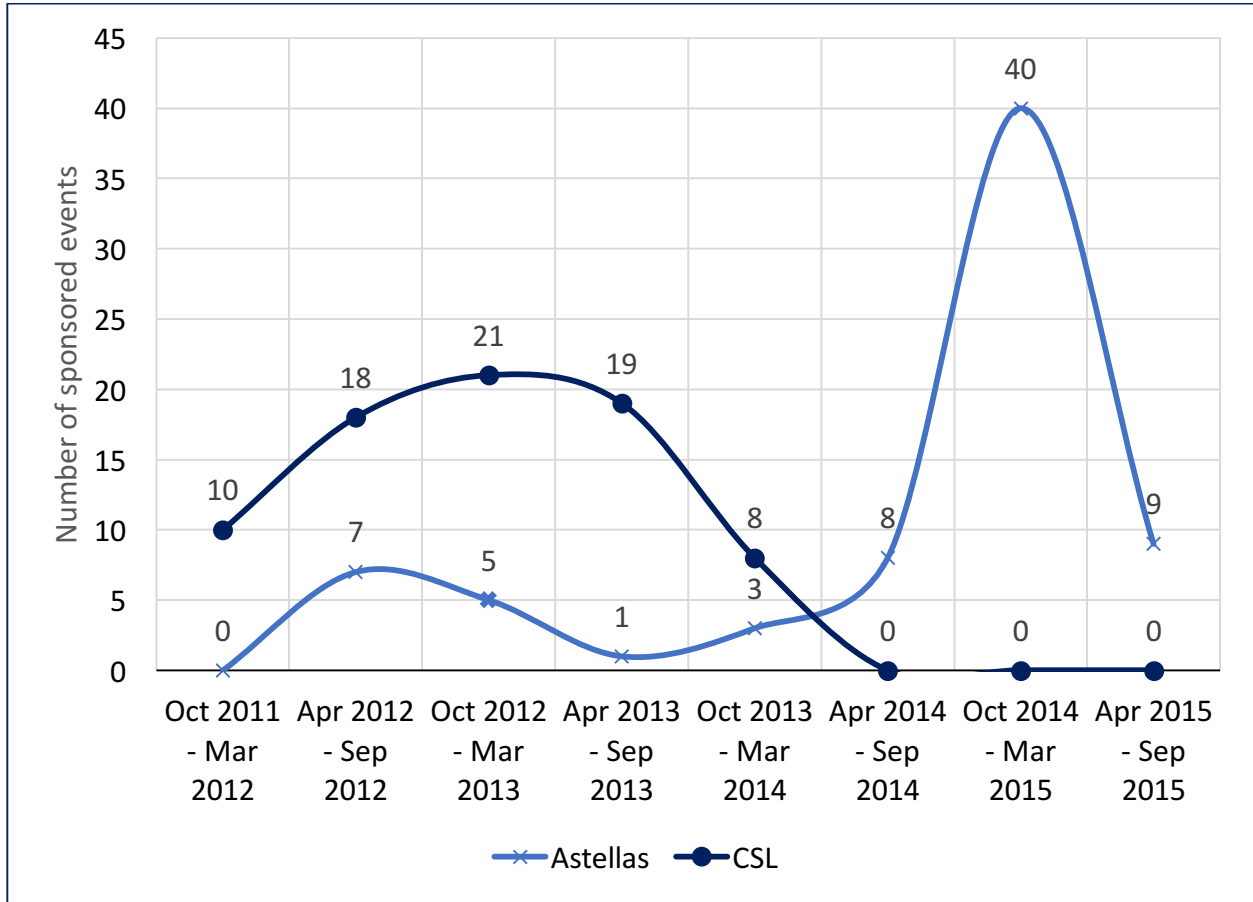

*Note:* CSL marketed solifenacin in Australia from February 2011 to October 2014, when marketing rights shifted to Astellas. Astellas also markets mirabegron, approved in Australia in February 2014.

**On-line Appendix Figure 5**

**Sales of non-PBS funded overactive bladder drugs over the study period**

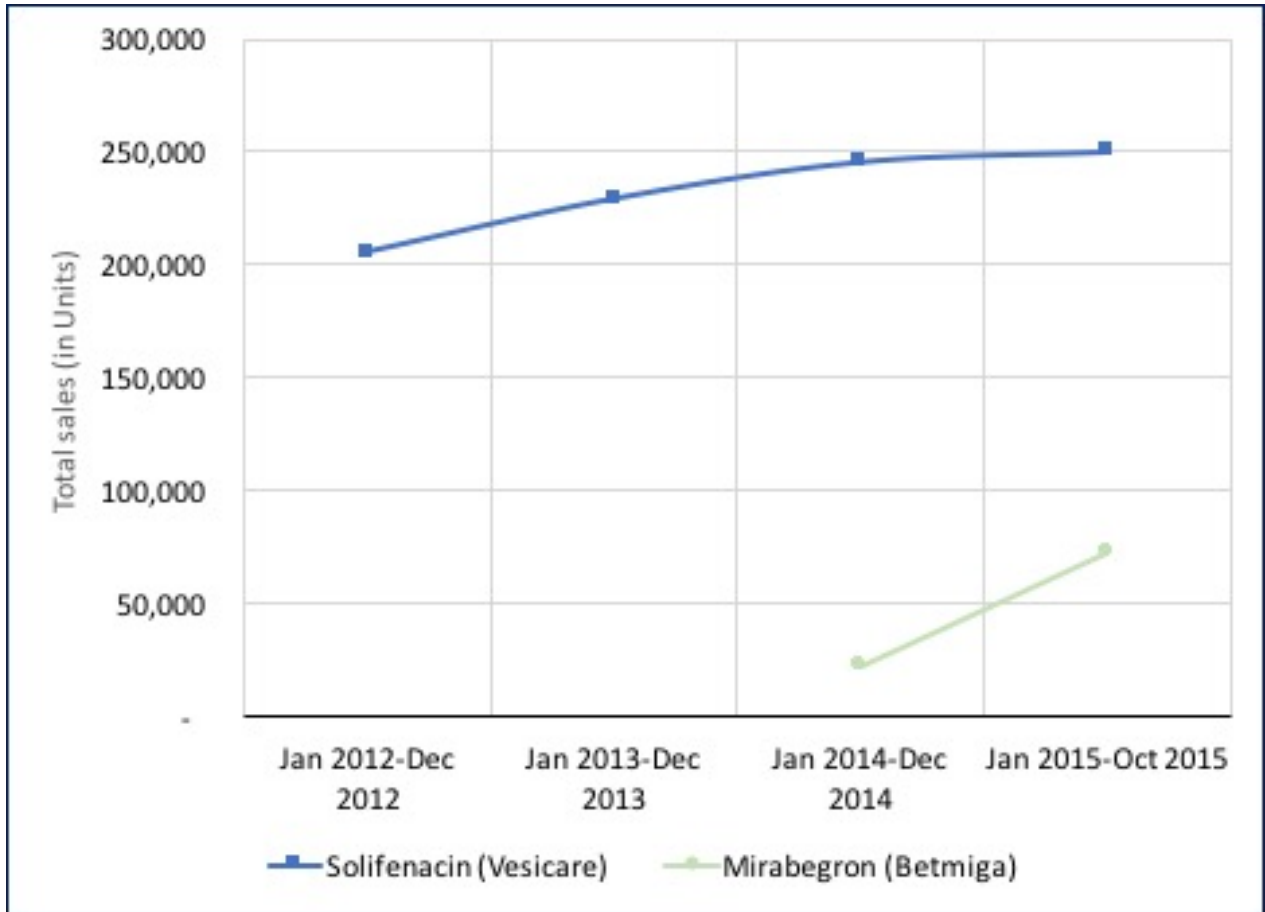

Mirabegron: 1 unit =30 days@ 25mg/day; solifenacin: 30 days@ 5mg or 10mg/day. Source: IMS Quintiles
